# Supplementary material for: Silica gel-immobilised chiral 1,2-benzenedisulfonimide: a Brønsted acid heterogeneous catalyst for enantioselective multicomponent Passerini reaction
Source: Royal Society of Chemistry journal article supplement (doi:10.1039/d1ra05297g), 2021-01-01

## Supplementary Information

**Silica gel-immobilized chiral 1,2-benzenedisulfonimide: a Brønsted acid heterogeneous catalyst for enantioselective Passerini reaction**

Achille Antenucci, Francesco Marra and Stefano Dughera

### INDEX

1. NMR spectra of 4,5-dicarboxy-3,6-bis(1-naphthyl)-1,2-benzenedisulfonimide (10); pag. 2
2. IR spectra of 4,5-dicarboxy-3,6-bis(1-naphthyl)-1,2-benzenedisulfonimide (10); pag. 3
3. IR spectrum of 3-aminopropyl functionalized silica gel (7); pag. 4
4. IR spectrum of solide residue of reaction carried out without EDCM; pag. 5
5. Table. Scope of the Passerini reaction carried out in DES without chiral heterogeneous catalyst 11; pag. 6
6. Spectra, HPLC diagrams and physical properties of adducts 15; pag. 8
7. IR and NMR spectra of urea/choline chloride DES; pag. 59

# NMR spectra of 4,5-dicarboxy-3,6-bis(1-naphthyl)-1,2-benzenedisulfonimide (10)

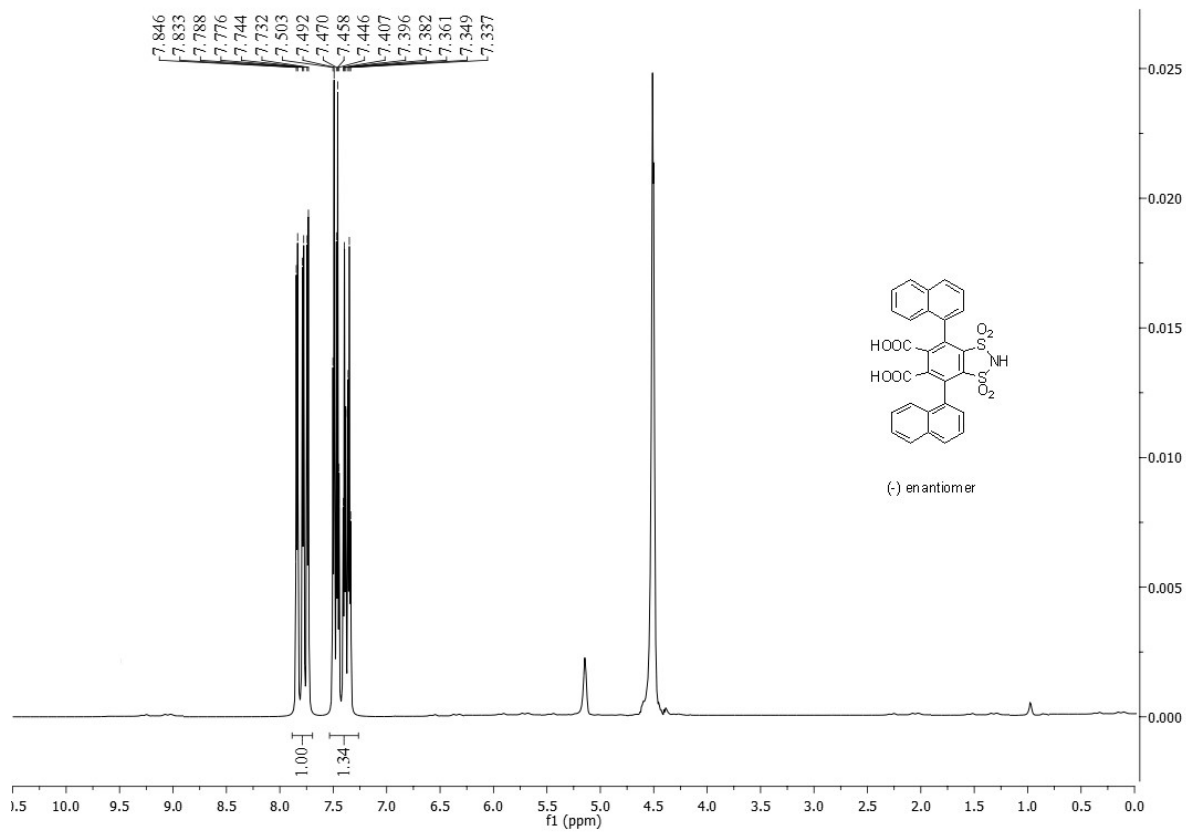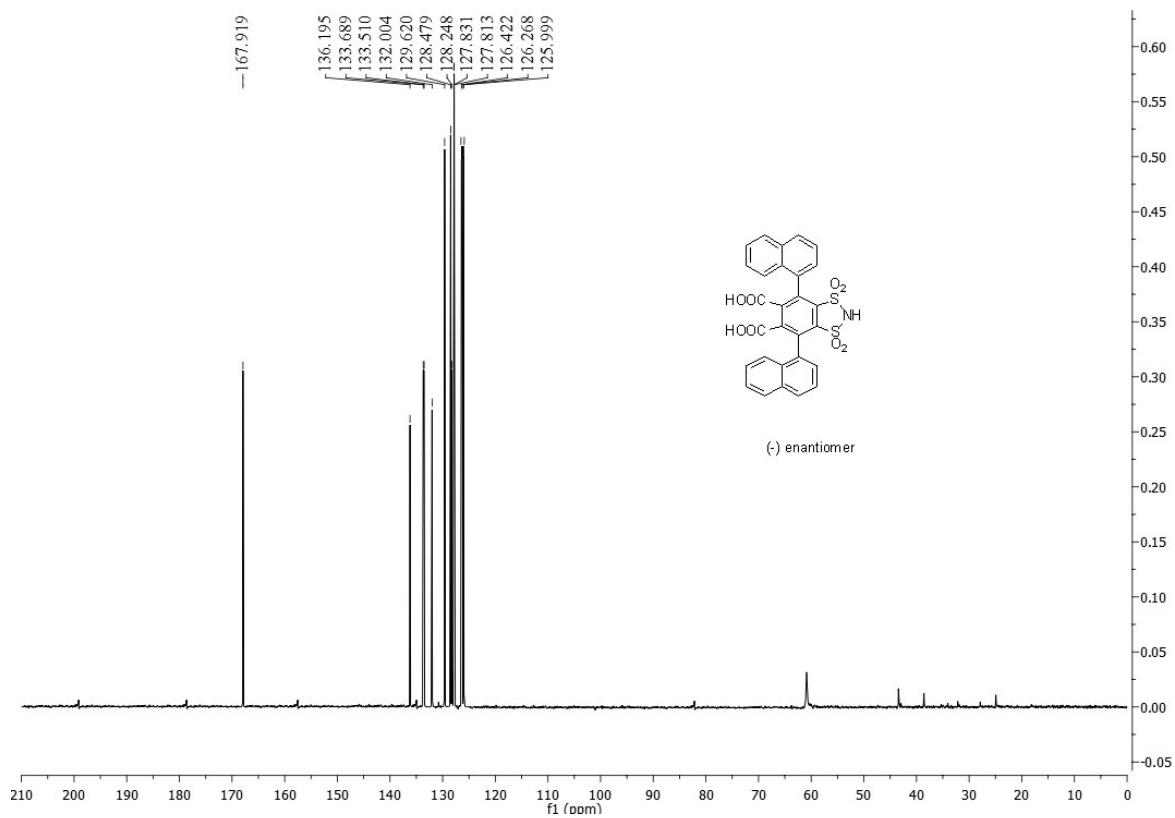

IR spectrum of 4,5-dicarboxy-3,6-bis(1-naphthyl)-1,2-benzenedisulfonimide (10)

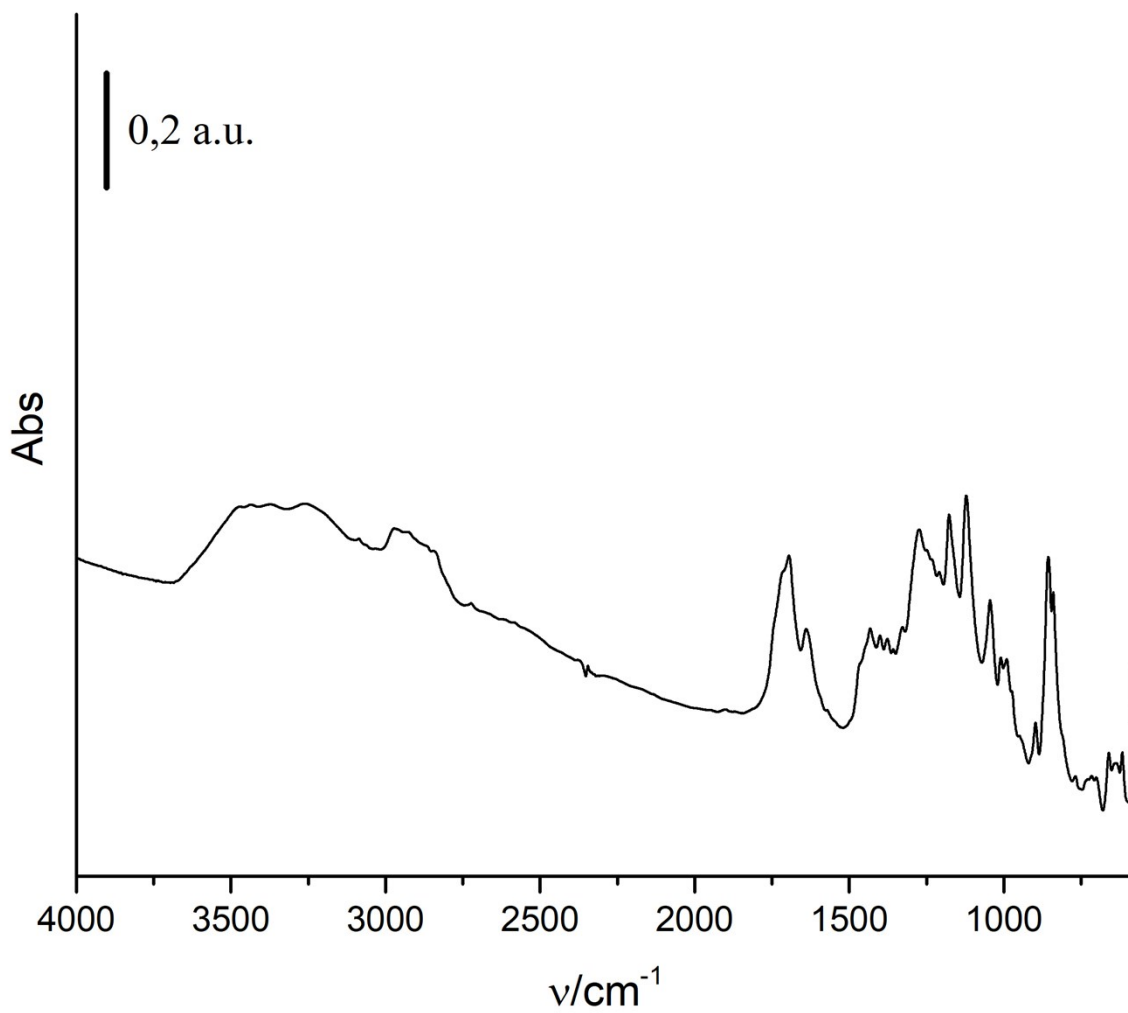

IR spectrum of 3-aminopropyl functionalized silica gel (7)

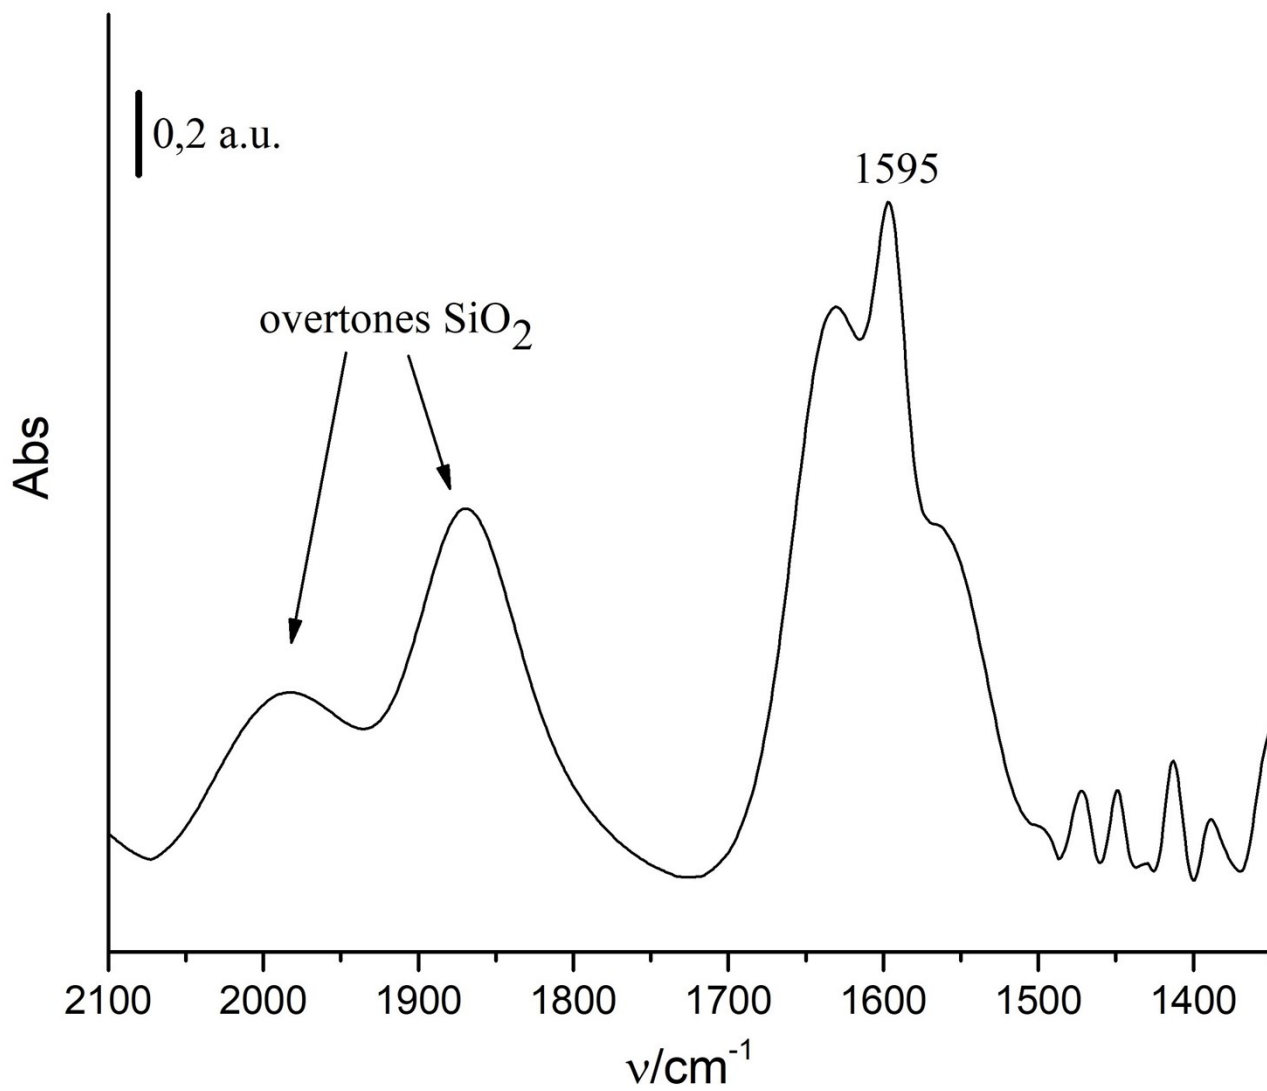

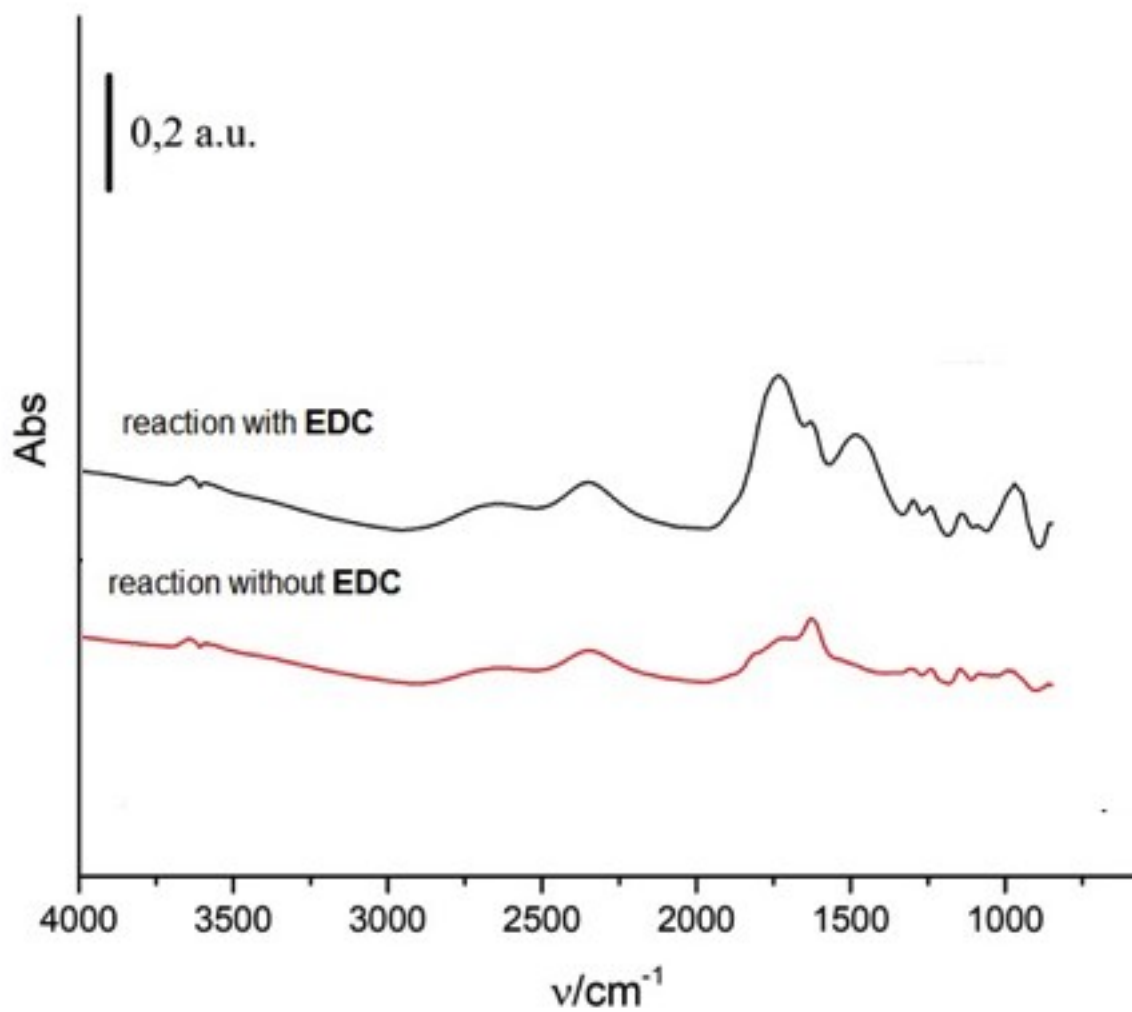

**Table.** Scope of the Passerini reaction carried out in DES without chiral heterogeneous catalyst **11**.

| $  \begin{array}{c}  \text{R}_1\text{---COOH} + \text{R}_2\text{---CHO} + \text{R}_3\text{---NC} \xrightarrow{\text{U/CC}} \text{R}_1\text{---C(=O)---O---CH(R}_2\text{)---C(=O)---N---R}_3 \\  \mathbf{12} \qquad \qquad \mathbf{13} \qquad \qquad \mathbf{14} \qquad \qquad \qquad \qquad \mathbf{15}  \end{array}  $ |                                                              |                                                              |                                 |          |            |                        |
|-------------------------------------------------------------------------------------------------------------------------------------------------------------------------------------------------------------------------------------------------------------------------------------------------------------------------|--------------------------------------------------------------|--------------------------------------------------------------|---------------------------------|----------|------------|------------------------|
| Entry                                                                                                                                                                                                                                                                                                                   | R <sub>1</sub> in RCOOH <b>12</b>                            | R <sub>2</sub> in RCHO <b>13</b>                             | R <sub>3</sub> in RNC <b>14</b> | Time (h) | <b>15</b>  | Yield (%) <sup>a</sup> |
| 1                                                                                                                                                                                                                                                                                                                       | Ph; <b>12a</b>                                               | Ph; <b>13a</b>                                               | <i>t</i> -Bu; <b>14a</b>        | 36       | <b>15a</b> | 91                     |
| 2                                                                                                                                                                                                                                                                                                                       | Ph; <b>12a</b>                                               | 3-NO <sub>2</sub> C <sub>6</sub> H <sub>4</sub> ; <b>13b</b> | <i>t</i> -Bu; <b>14a</b>        | 38       | <b>15b</b> | 95                     |
| 3                                                                                                                                                                                                                                                                                                                       | Ph; <b>12a</b>                                               | 4-MeOC <sub>6</sub> H <sub>4</sub> ; <b>13c</b>              | <i>t</i> -Bu; <b>14a</b>        | 40       | <b>15c</b> | 83                     |
| 4                                                                                                                                                                                                                                                                                                                       | Ph; <b>12a</b>                                               | 4-ClC <sub>6</sub> H <sub>4</sub> ; <b>13d</b>               | <i>t</i> -Bu; <b>14a</b>        | 32       | <b>15d</b> | 98                     |
| 5                                                                                                                                                                                                                                                                                                                       | Ph; <b>12a</b>                                               | 4-MeC <sub>6</sub> H <sub>4</sub> ; <b>13e</b>               | <i>t</i> -Bu; <b>14a</b>        | 34       | <b>15e</b> | 85                     |
| 6                                                                                                                                                                                                                                                                                                                       | Ph; <b>12a</b>                                               | PhCH=CH; <b>13f</b>                                          | <i>t</i> -Bu; <b>14a</b>        | 42       | <b>15f</b> | 84                     |
| 7                                                                                                                                                                                                                                                                                                                       | Ph; <b>12a</b>                                               | <i>i</i> -Pr; <b>13g</b>                                     | <i>t</i> -Bu; <b>14a</b>        | 38       | <b>15g</b> | 91                     |
| 8                                                                                                                                                                                                                                                                                                                       | 4-NO <sub>2</sub> C <sub>6</sub> H <sub>4</sub> ; <b>12b</b> | Ph; <b>13a</b>                                               | <i>t</i> -Bu; <b>14a</b>        | 30       | <b>15h</b> | 86                     |
| 9                                                                                                                                                                                                                                                                                                                       | 4-MeOC <sub>6</sub> H <sub>4</sub> ; <b>12c</b>              | Ph; <b>13a</b>                                               | <i>t</i> -Bu; <b>14a</b>        | 48       | <b>15i</b> | 84                     |
| 10                                                                                                                                                                                                                                                                                                                      | 4-ClC <sub>6</sub> H <sub>4</sub> ; <b>12d</b>               | Ph; <b>13a</b>                                               | <i>t</i> -Bu; <b>14a</b>        | 36       | <b>15j</b> | 92                     |
| 11                                                                                                                                                                                                                                                                                                                      | Me; <b>12e</b>                                               | Ph; <b>13a</b>                                               | <i>t</i> -Bu; <b>14a</b>        | 30       | <b>15k</b> | 86                     |
| 12                                                                                                                                                                                                                                                                                                                      | PhCH <sub>2</sub> ; <b>12f</b>                               | Ph; <b>13a</b>                                               | <i>t</i> -Bu; <b>14a</b>        | 34       | <b>15l</b> | 90                     |
| 13                                                                                                                                                                                                                                                                                                                      | 3-Pyridyl; <b>12g</b>                                        | 4-ClC <sub>6</sub> H <sub>4</sub> ; <b>13d</b>               | <i>t</i> -Bu; <b>14a</b>        | 36       | <b>15m</b> | 82                     |

|    |                |                                                              |                          |                 |            |    |
|----|----------------|--------------------------------------------------------------|--------------------------|-----------------|------------|----|
| 14 | Ph; <b>12a</b> | Ph; <b>13a</b>                                               | 2-Naphthyl; <b>14b</b>   | 36              | <b>15n</b> | 86 |
| 15 | Ph; <b>12a</b> | 4-ClC <sub>6</sub> H <sub>4</sub> ; <b>13d</b>               | 2-Naphthyl; <b>14b</b>   | 32              | <b>15o</b> | 83 |
| 16 | Me; <b>12e</b> | 3-NO <sub>2</sub> C <sub>6</sub> H <sub>4</sub> ; <b>13b</b> | 2-Naphthyl; <b>14b</b>   | 32              | <b>15p</b> | 88 |
| 17 | Me; <b>12e</b> | <i>i</i> -Pr; <b>13g</b>                                     | 2-Naphthyl; <b>14b</b>   | 30              | <b>15q</b> | 87 |
| 18 | Ph; <b>12a</b> | PhCOMe; <b>13h</b>                                           | <i>t</i> -Bu; <b>14a</b> | 48 <sup>b</sup> | <b>15r</b> | -  |

<sup>a</sup> Yields refer to pure and isolated **15**. Times and yields refer to the reactions carried out with 1 mmol of **12a**, **13a**, **14a**.<sup>b</sup> After 48 h, GC-MS analyses showed the presence of unreacted **12a**, **13h** and **14a**. **15r** was detected only in traces ; *m/z*: 325 (M<sup>+</sup>).

**2-(*tert*-Butylamino)-2-oxo-1-phenylethyl benzoate (15a):**

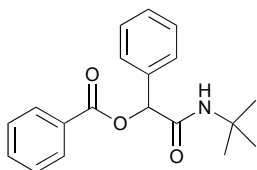

White solid (270 mg, 87% yield); mp 151–152 °C (from EtOH; lit. 150–151°C). 94.8% ee, determined by chiral stationary phase HPLC analysis (Daicel Chiralpack IG-SFC) isopropanol/hexane = 30/70, 1.0 mL/min,  $\lambda = 230$  nm,  $t_R$  (minor) = 15.4 min,  $t_R$  (major) = 16.3 min].  $\nu_{\max}/\text{cm}^{-1}$  3283 (NH), 1729, 1648 (CO).  $\delta_H$  (600 MHz,  $\text{CDCl}_3$ ) 8.09–8.08 (m, 2H), 7.63–7.59 (m, 1H), 7.52–7.51 (m, 4H), 7.39–7.35 (m, 3H), 6.22 (s, 2H), 1.36 (s, 9H).  $\delta_C$  (150 MHz,  $\text{CDCl}_3$ ) 167.5, 165.0, 136.1, 133.7, 129.9, 129.2, 129.1, 128.9, 128.7, 127.5, 76.1, 51.8, 28.9.  $m/z$ : 311 ( $M^+$ , 1%), 212 (45), 105 (100). HRMS (ESI,  $m/z$ ): 312.16 ( $M+H^+$ ).

L. A. Polindara-Garcia and E. Juaristi, *Eur. J. Org. Chem.*, 2016, 1095–1102.



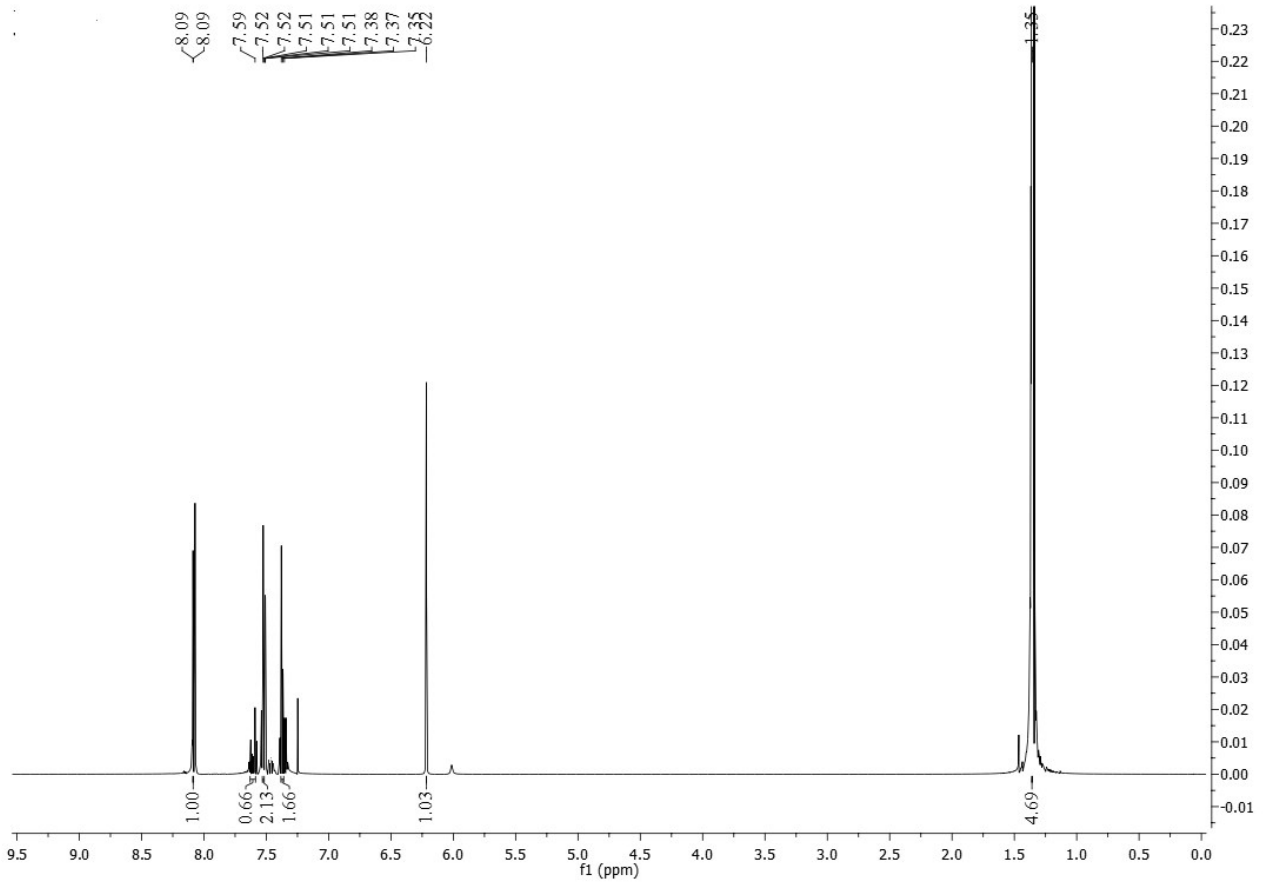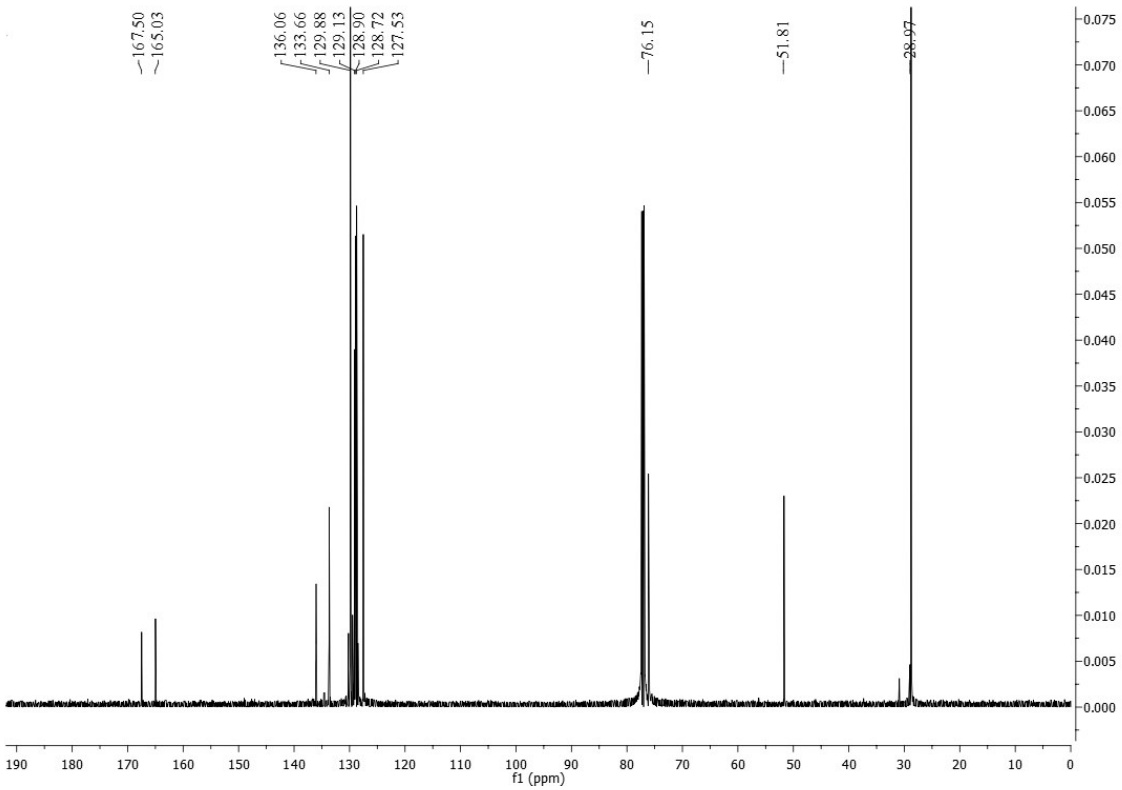

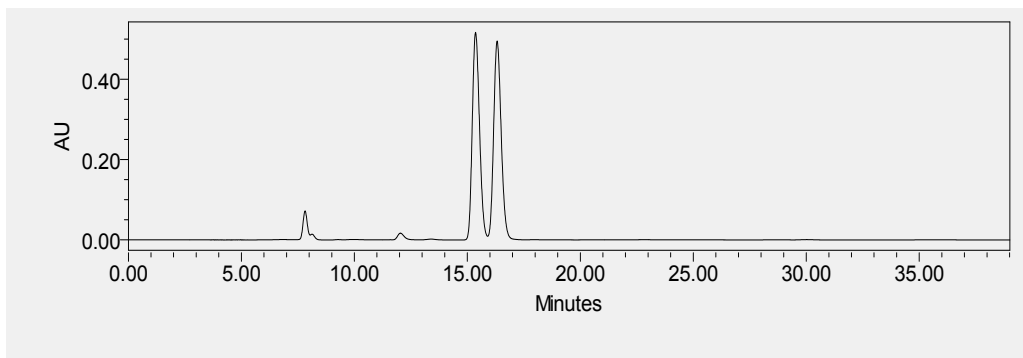

| Name | Retention Time | Area     | % Area | Height | Int Type | Amount | Units | Peak Type | Peak Codes |
|------|----------------|----------|--------|--------|----------|--------|-------|-----------|------------|
| 1    | 15.364         | 14969151 | 49.89  | 699175 | bb       |        |       | Unknown   |            |
| 2    | 16.319         | 15034694 | 50.11  | 669843 | bb       |        |       | Unknown   |            |

**2-(*tert*-butylamino)-2-oxo-1-phenylethyl benzoate (15a): racemate**

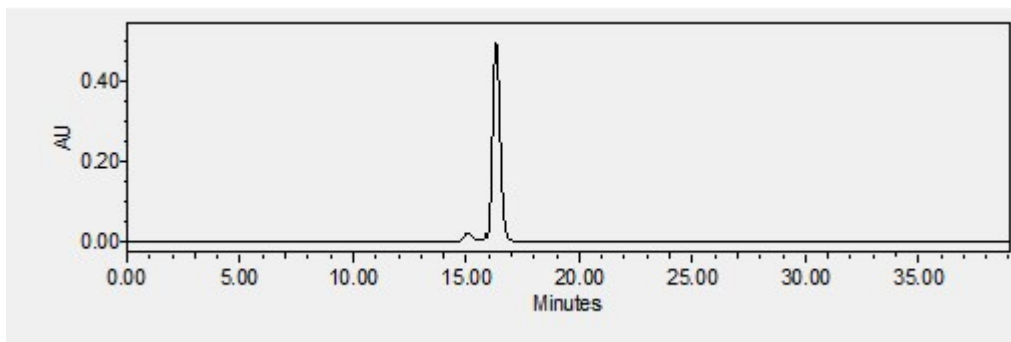

| Name | Retention Time | Area     | % Area | Height | Int Type | Amount | Units | Peak Type | Peak Codes |
|------|----------------|----------|--------|--------|----------|--------|-------|-----------|------------|
| 1    | 15.392         | 412375   | 2.59   | 775    | bb       |        |       | Unknown   |            |
| 2    | 16.309         | 15529121 | 97.41  | 667756 | bb       |        |       | Unknown   |            |

**2-(*tert*-butylamino)-2-oxo-1-phenylethyl benzoate (15a): in the presence of chiral catalyst 11.**

**2-(*tert*-butylamino)-1-(3-nitrophenyl)-2-oxoethyl benzoate (15b):**

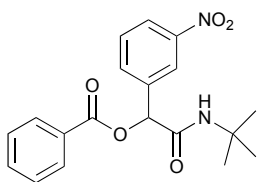

White solid (332 mg, 93% yield); mp 166–167 °C (from EtOH; lit. 163–165°C). 96.4% ee, determined by chiral stationary phase HPLC analysis (Daicel Chiralpack IG-SFC) isopropanol/hexane = 15/85, 1.0 mL/min,  $\lambda$  = 230 nm,  $t_R$  (minor) = 26.6 min,  $t_R$  (major) = 28.9 min].  $\nu_{\max}/\text{cm}^{-1}$  3294 (NH), 1731, 1645 (CO).  $\delta_H$  (600 MHz,  $\text{CDCl}_3$ ) 8.36 (s, 1H), 8.22–8.17 (m, 1H), 8.07 (d,  $J$  = 7.8 Hz, 2H), 7.89 (d,  $J$  = 7.8 Hz, 1H), 7.75 (t,  $J$  = 7.8 Hz, 1H), 7.56 (t,  $J$  = 8.4 Hz, 1H), 7.49–7.47 (m, 2H), 6.28 (s, 2H), 1.36 (s, 9H).  $\delta_C$  (150 MHz,  $\text{CDCl}_3$ ) 166.4, 164.7, 148.4, 138.2, 134.1, 133.8, 129.83, 129.81, 128.8, 128.7, 123.8, 122.1, 74.7, 51.8, 28.6.  $m/z$ : 356 ( $M^+$ , 1%), 135 (55), 105 (100). HRMS (ESI,  $m/z$ ): 357.15 ( $M+H^+$ ).

X. Fan, Y. Li, X. Zhang, G. Qu and J. Wang, *Can. J. Chem.*, 2006, **84**, 794–799.

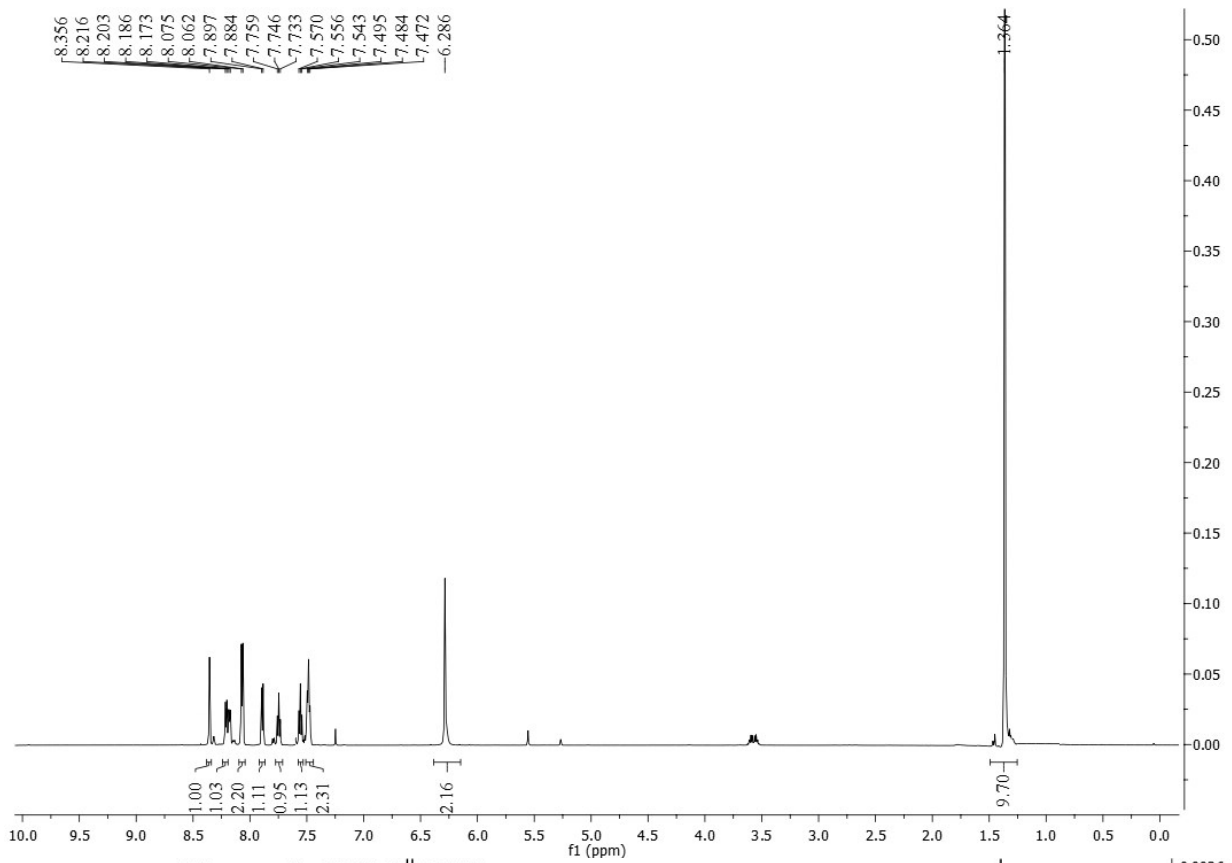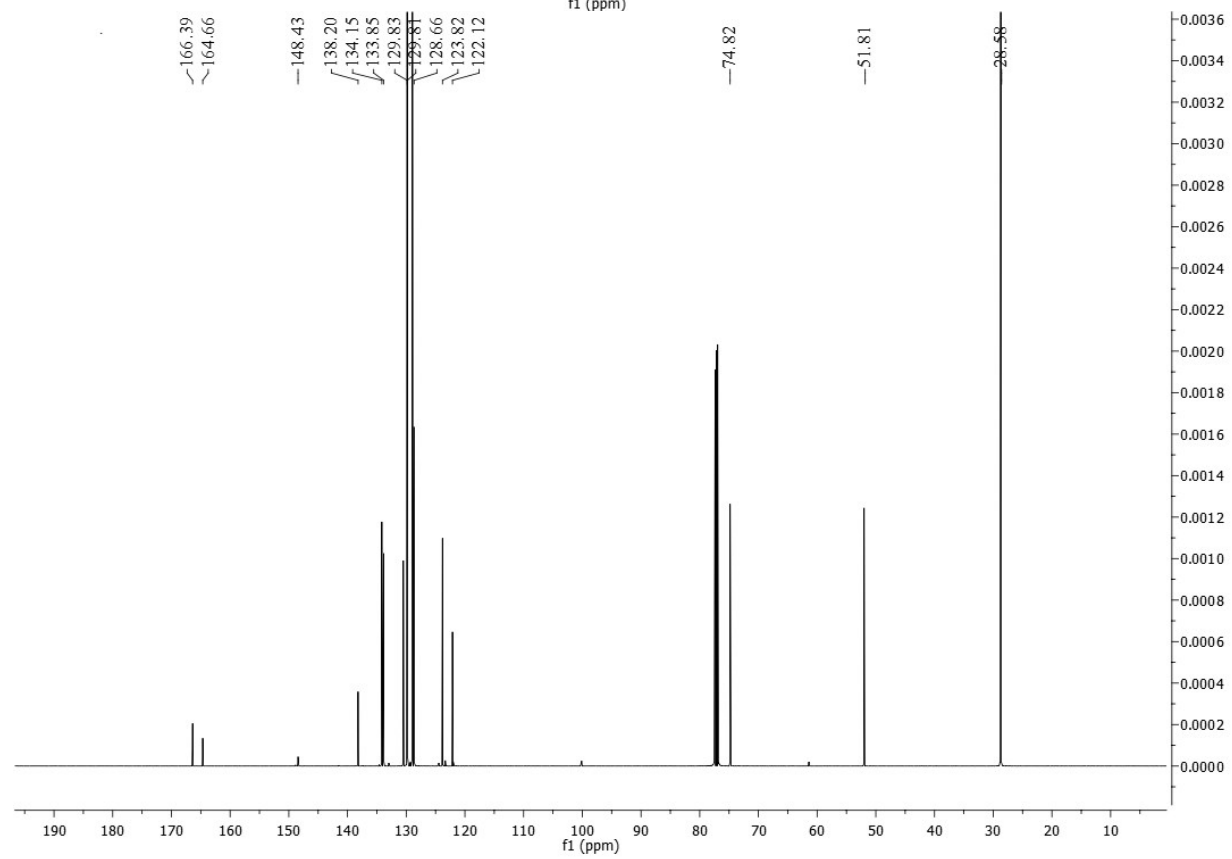

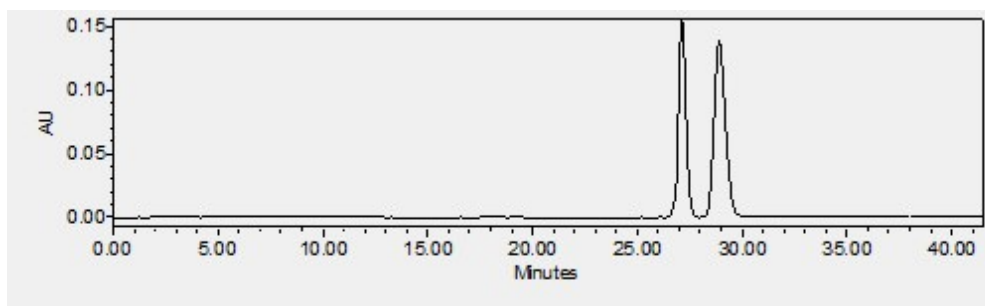

| Name | Retention Time | Area     | % Area | Height | Int Type | Amount | Units | Peak Type | Peak Codes |
|------|----------------|----------|--------|--------|----------|--------|-------|-----------|------------|
|      | 26.595         | 15023459 | 49.84  | 367009 | bb       |        |       | Unknown   |            |
|      | 28.928         | 15119735 | 50.16  | 327841 | bb       |        |       | Unknown   |            |

**2-(*tert*-butylamino)-2-oxo-1-(3-nitrophenyl)ethyl benzoate (15b): racemate**

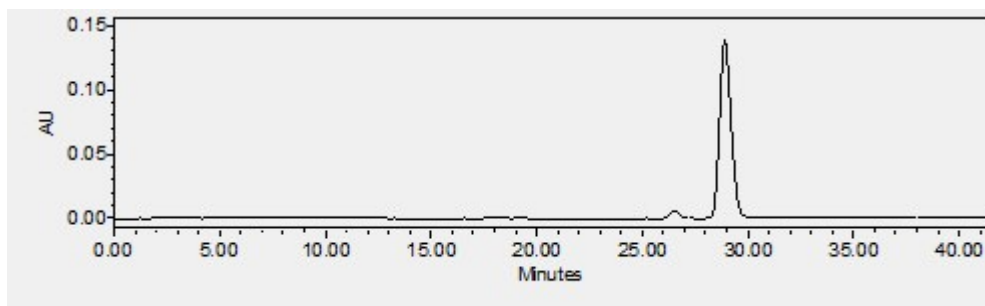

|   | Name | Retention Time | Area     | % Area | Height | Int Type | Amount | Units | Peak Type | Peak Codes |
|---|------|----------------|----------|--------|--------|----------|--------|-------|-----------|------------|
| 1 |      | 26.575         | 205660   | 1.82   | 550    | bb       |        |       | Unknown   |            |
| 2 |      | 28.908         | 11118735 | 98.18  | 307841 | bb       |        |       | Unknown   |            |

**2-(*tert*-butylamino)-2-oxo-1-(3-nitrophenyl)ethyl benzoate (15b): in the presence of chiral catalyst 11.**

**2-(*tert*-butylamino)-1-(4-methoxyphenyl)-2-oxoethyl benzoate (15c) :**

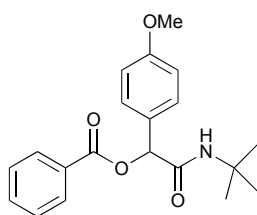

White solid (291 mg, 85% yield); mp 147–148 °C (from EtOH; lit. 149–150°C). 96.8% ee, determined by chiral stationary phase HPLC analysis (Daicel Chiralpack IG-SFC) isopropanol/hexane = 10/90, 1.0 mL/min,  $\lambda$  = 214 nm,  $t_R$  (minor) = 18.9 min,  $t_R$  (major) = 19.9 min.  $\nu_{\max}/\text{cm}^{-1}$  3284 (NH), 1728, 1654 (CO).  $\delta_H$  (600 MHz,  $\text{CDCl}_3$ ) 8.06 (d,  $J$  = 7.8 Hz, 2H), 7.58–7.56 (m, 1H), 7.46–7.42 (m, 4H), 6.89 (d,  $J$  = 9.0 Hz, 2H), 6.19 (s, 1H), 6.02 (br s, 1H), 3.86 (s, 3H), 1.35 (s, 9H).  $\delta_C$  (150 MHz,  $\text{CDCl}_3$ ) 167.8, 165.0, 160.1, 133.6, 129.8, 129.6, 129.1, 128.7, 128.5, 114.4, 75.9, 55.7, 51.8, 28.9.  $m/z$ : 341 ( $M^+$ , 1%), 242 (45), 105 (100). HRMS (ESI,  $m/z$ ): 342.18 ( $M+H^+$ ).

L. A. Polindara-Garcia and E. Juaristi, *Eur. J. Org. Chem.*, 2016, 1095–1102.

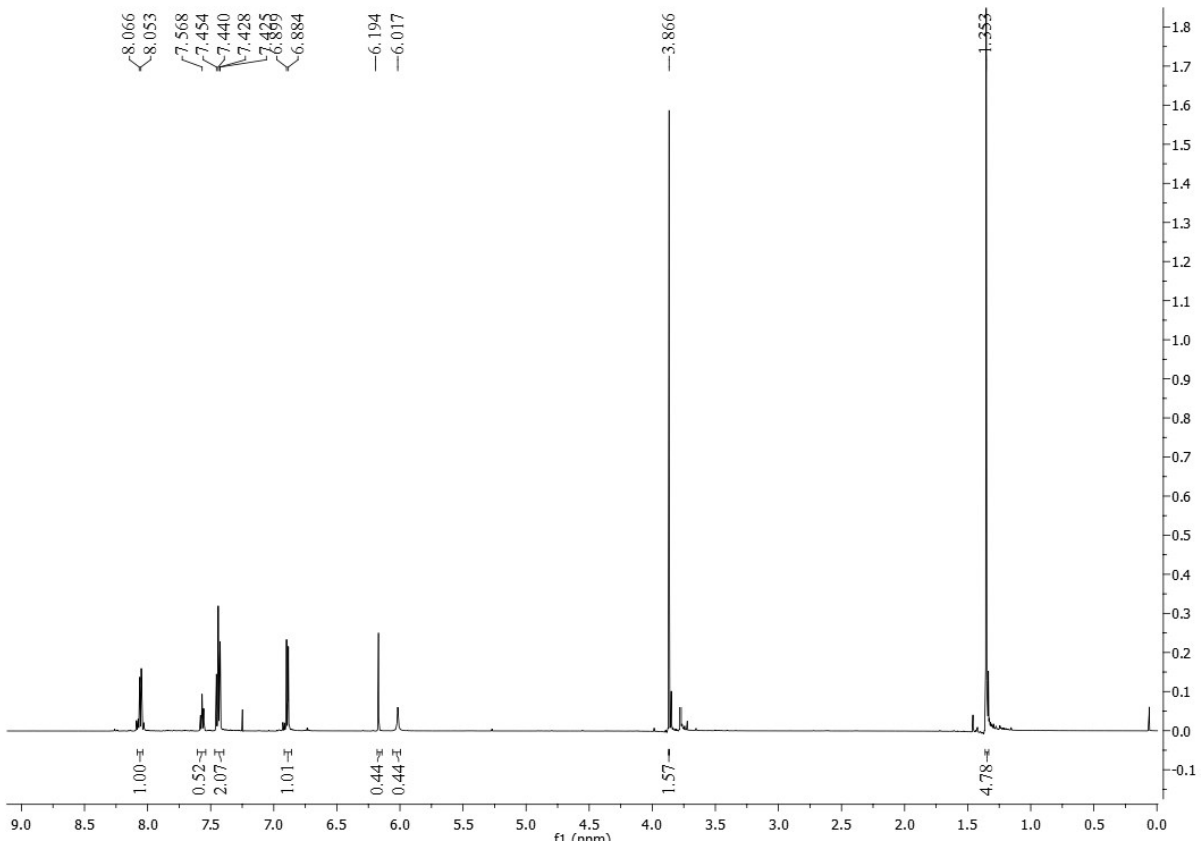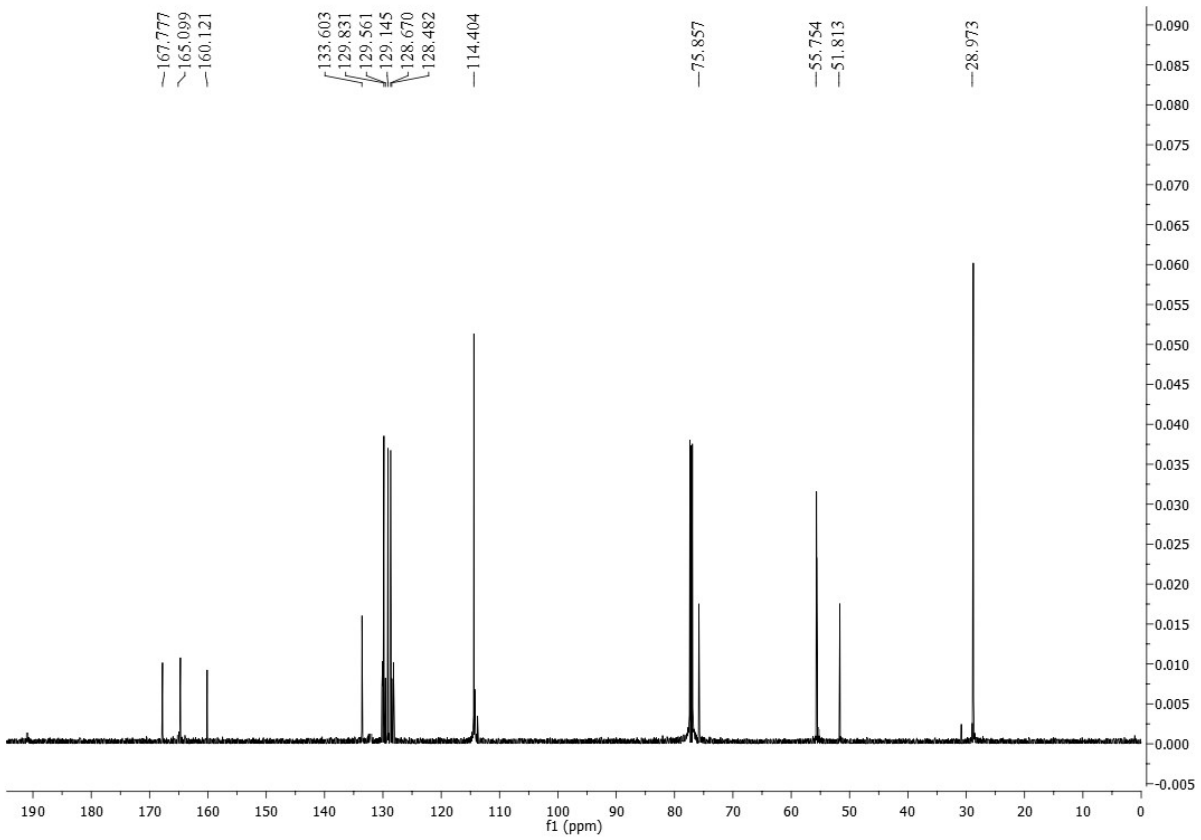

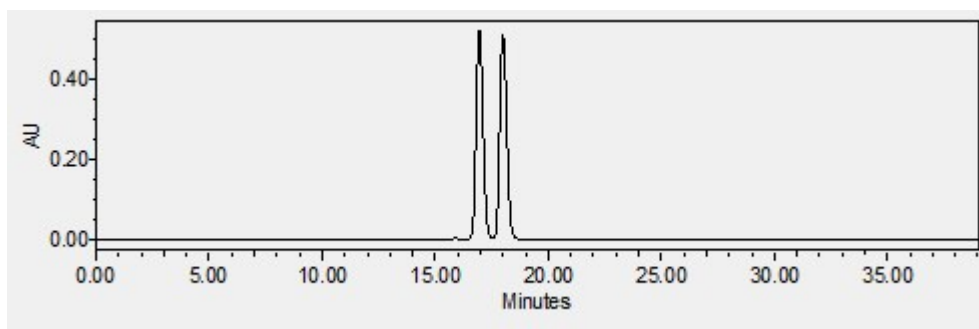

| Name | Retention Time | Area    | % Area | Height | Int Type | Amount | Units | Peak Type | Peak Codes |
|------|----------------|---------|--------|--------|----------|--------|-------|-----------|------------|
| 1    | 17.010         | 8923946 | 50.96  | 365176 | bb       |        |       | Unknown   |            |
| 2    | 18.115         | 8587991 | 49.04  | 349168 | bb       |        |       | Unknown   |            |

**2-(*tert*-butylamino)-2-oxo-1-(4-methoxyphenyl)ethyl benzoate (15c): racemate**

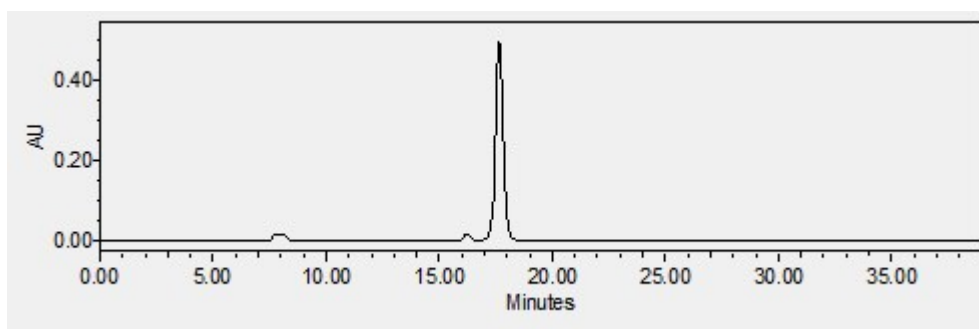

| Name | Retention Time | Area    | % Area | Height | Int Type | Amount | Units | Peak Type | Peak Codes |
|------|----------------|---------|--------|--------|----------|--------|-------|-----------|------------|
| 1    | 18.885         | 128663  | 1.56   | 451    | bb       |        |       | Unknown   |            |
| 2    | 19.890         | 8139009 | 98.34  | 355473 | bb       |        |       | Unknown   |            |

**2-(*tert*-butylamino)-2-oxo-1-(4-methoxyphenyl)ethyl benzoate (15c): in the presence of chiral catalyst 11.**



**2-(tert-butylamino)-1-(4-chlorophenyl)-2-oxoethyl benzoate (15d) :**

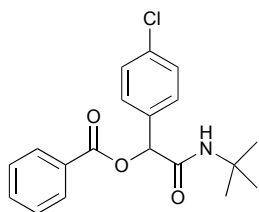

White solid (322 mg, 93% yield); mp 151–152 °C (from EtOH; lit. 150–151°C). 96.9% ee, determined by chiral stationary phase HPLC analysis (Daicel Chiralpack IG-SFC) isopropanol/hexane = 20/80, 1.0 mL/min,  $\lambda = 254$  nm,  $t_R$  (minor) = 18.8 min,  $t_R$  (major) = 19.8 min.  $\nu_{\max}/\text{cm}^{-1}$  3281 (NH), 1728, 1651 (CO).  $\delta_H$  (600 MHz,  $\text{CDCl}_3$ ) 8.06 (d,  $J = 8.4$  Hz, 2H), 7.81–7.80 (m, 1H), 7.51–7.44 (m, 4H), 7.34 (d,  $J = 8.4$  Hz, 2H), 6.17 (s, 1H), 6.06 (br s, 1H), 1.34 (s, 9H).  $\delta_C$  (150 MHz,  $\text{CDCl}_3$ ). 167.0, 165.2, 134.9, 134.8, 133.9, 130.9, 129.8, 129.5, 129.1, 128.8, 75.4, 51.7, 28.9.  $m/z$ : 345 ( $M^+$ , 1%), 246 (35), 105 (100). HRMS (ESI,  $m/z$ ): 346.12 ( $M+H^+$ ).

L. A. Polindara-Garcia and E. Juaristi, *Eur. J. Org. Chem.*, 2016, 1095–1102.

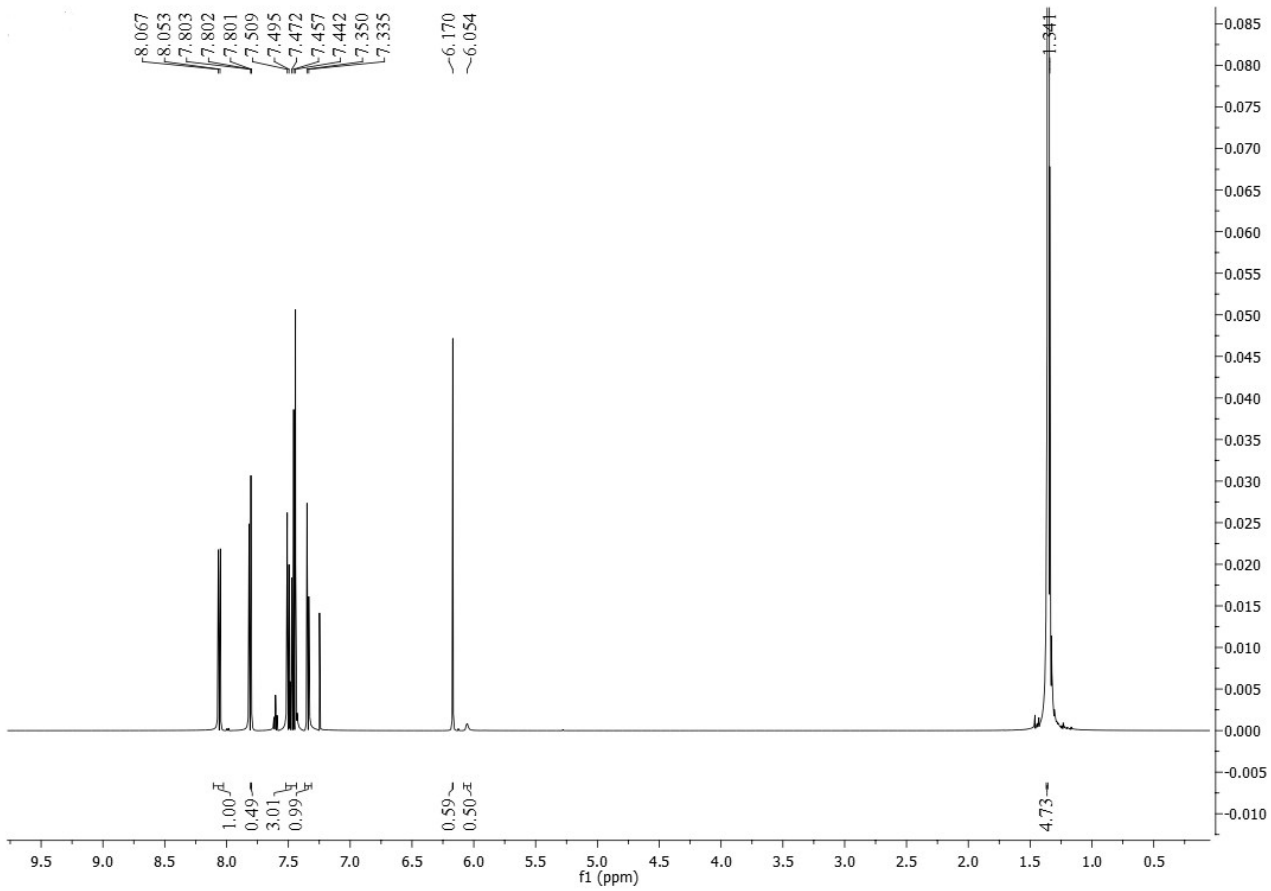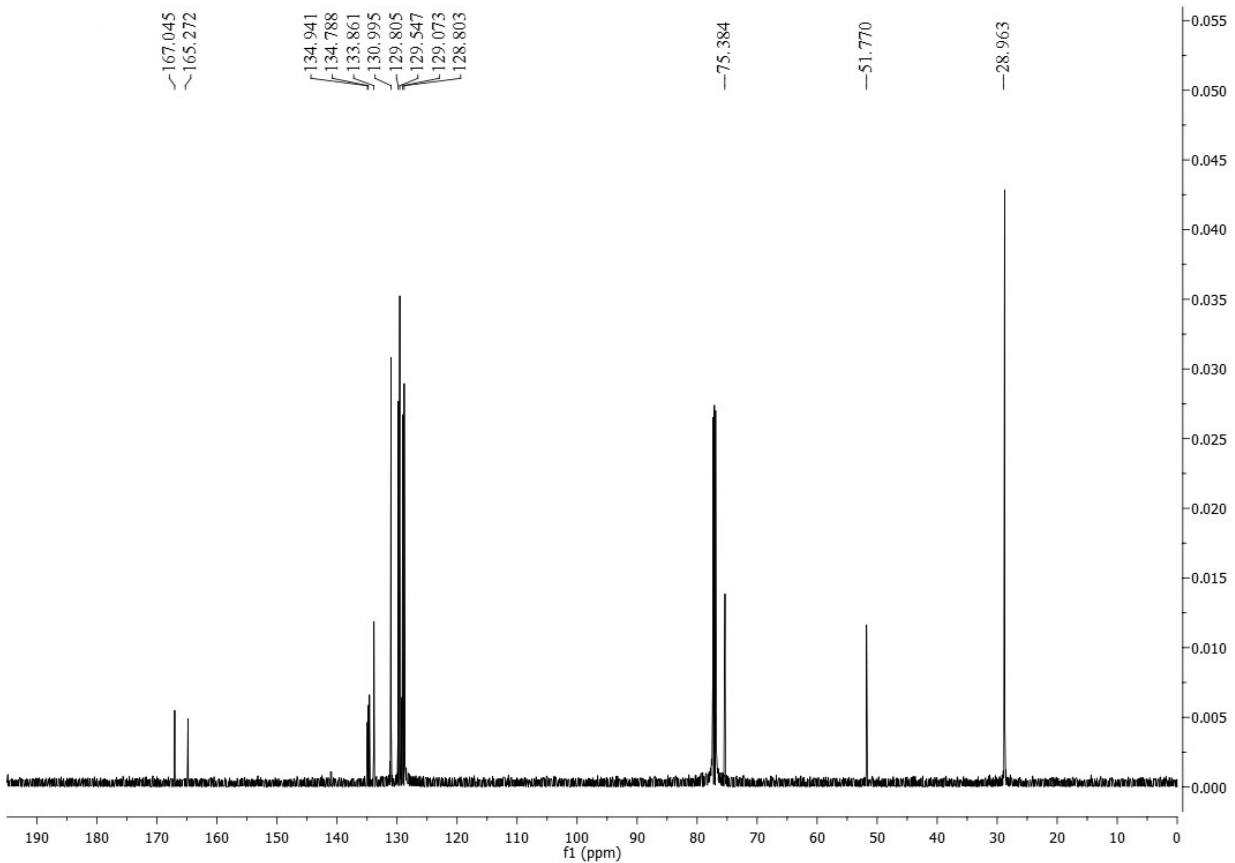

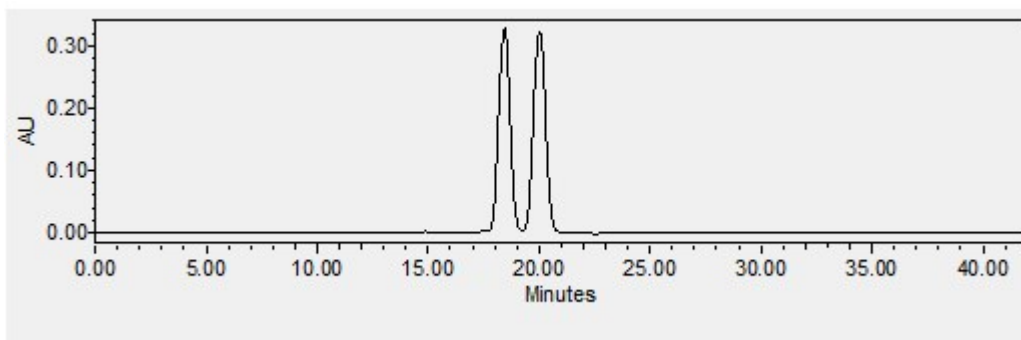

|   | Name | Retention Time | Area    | % Area | Height  | Int Type | Amount | Units | Peak Type | Peak Codes |
|---|------|----------------|---------|--------|---------|----------|--------|-------|-----------|------------|
| 1 |      | 18.999         | 4045807 | 48.96  | 1077602 | bb       |        |       | Unknown   |            |
| 2 |      | 20.107         | 4217634 | 51.04  | 1055291 | bb       |        |       | Unknown   |            |

**2-(*tert*-butylamino)-1-(4-chlorophenyl)-2-oxoethyl benzoate (15d): racemate**

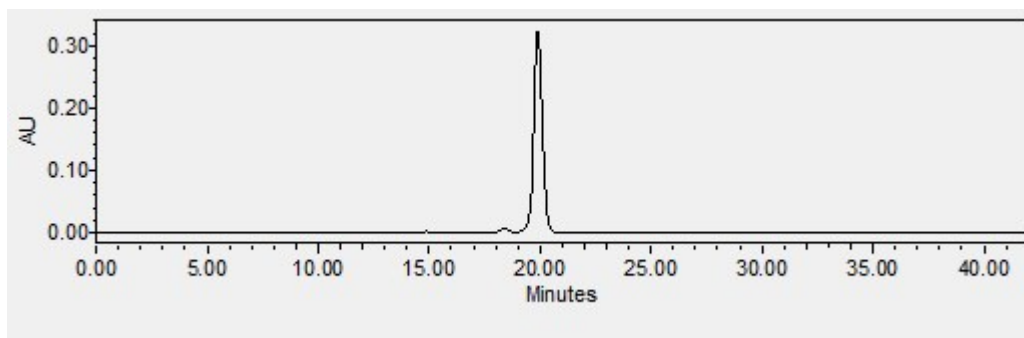

|   | Name | Retention Time | Area    | % Area | Height  | Int Type | Amount | Units | Peak Type | Peak Codes |
|---|------|----------------|---------|--------|---------|----------|--------|-------|-----------|------------|
| 1 |      | 18.807         | 128663  | 1.56   | 1251    | bb       |        |       | Unknown   |            |
| 2 |      | 19.799         | 8139009 | 98.44  | 1055183 | bb       |        |       | Unknown   |            |

**2-(*tert*-butylamino)-1-(4-chlorophenyl)-2-oxoethyl benzoate (15d): in the presence of chiral catalyst 11.**

**2-(tert-butylamino)-2-oxo-1-(4-tolyl)ethyl benzoate (15e):**

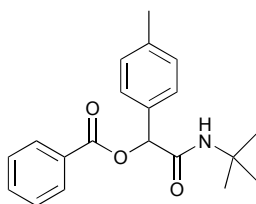

White solid (282 mg, 87% yield); mp 157–158 °C (from EtOH; lit. 157–158°C). 97.6% ee, determined by chiral stationary phase HPLC analysis (Daicel Chiralpack IG-SFC) isopropanol/hexane = 20/80, 1.0 mL/min,  $\lambda = 214$  nm,  $t_R$  (minor) = 16.9 min,  $t_R$  (major) = 18.0 min.  $\nu_{\max}/\text{cm}^{-1}$  3282 (NH), 1719, 1653 (CO).  $\delta_H$  (600 MHz,  $\text{CDCl}_3$ ). 8.06 (d,  $J = 8.4$  2H), 7.59–7.58 (m, 1H), 7.47–7.44 (m, 2H), 7.40–7.39 (m, 2H), 7.18 (d,  $J = 8.4$  Hz, 2H), 6.18 (s, 1H), 5.97 (br s, 1H), 2.34 (s, 3H), 1.36 (s, 9H).  $\delta_C$  (150 MHz,  $\text{CDCl}_3$ ) 167.7, 164.8, 138.9, 133.6, 133.1, 129.8, 129.6, 128.7, 127.5, 76.1, 51.6, 28.9, 21.3.  $m/z$ : 325 ( $M^+$ , 1%), 266 (55), 105 (100). HRMS (ESI,  $m/z$ ): 326.19 ( $M+H^+$ ).

L. A. Polindara-Garcia and E. Juaristi, *Eur. J. Org. Chem.*, 2016, 1095–1102.

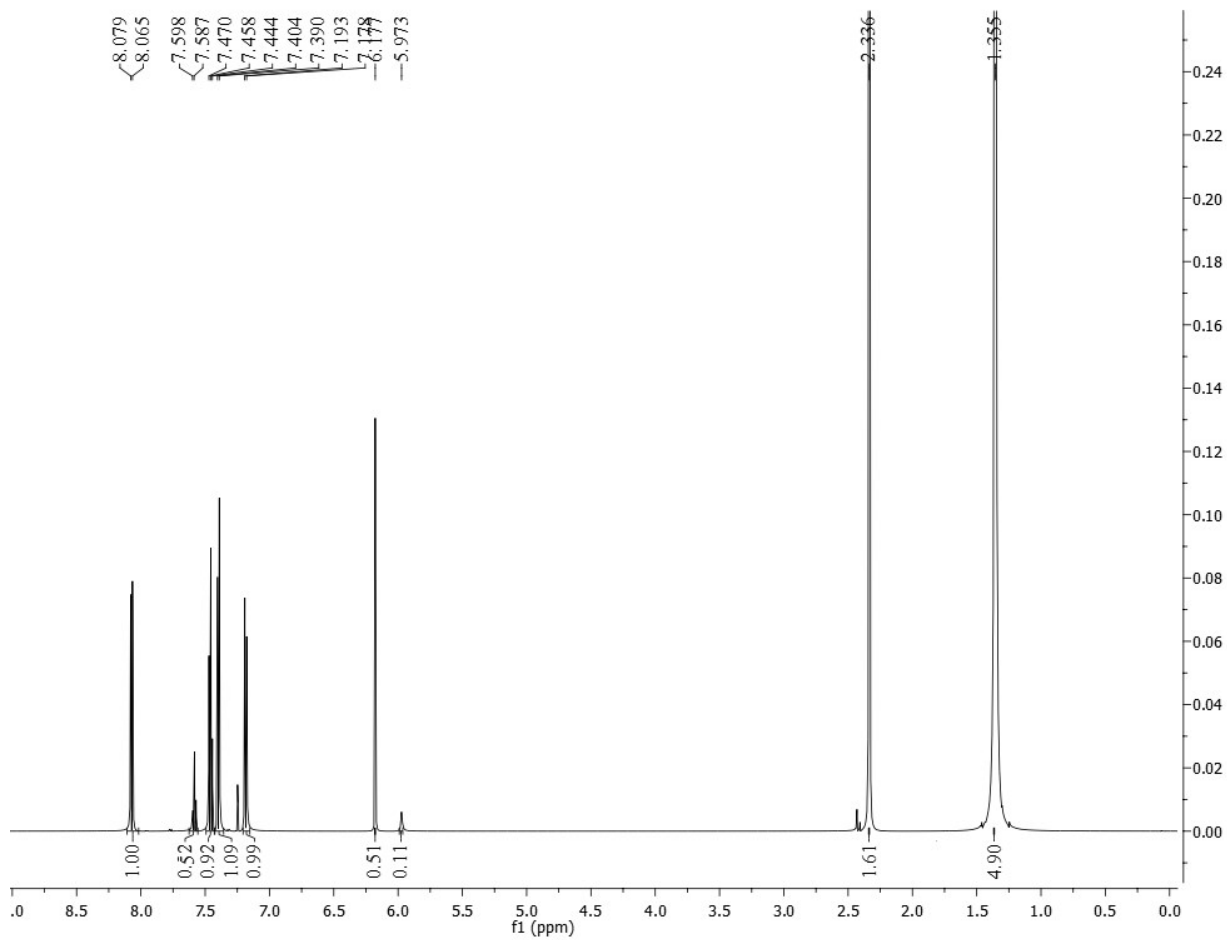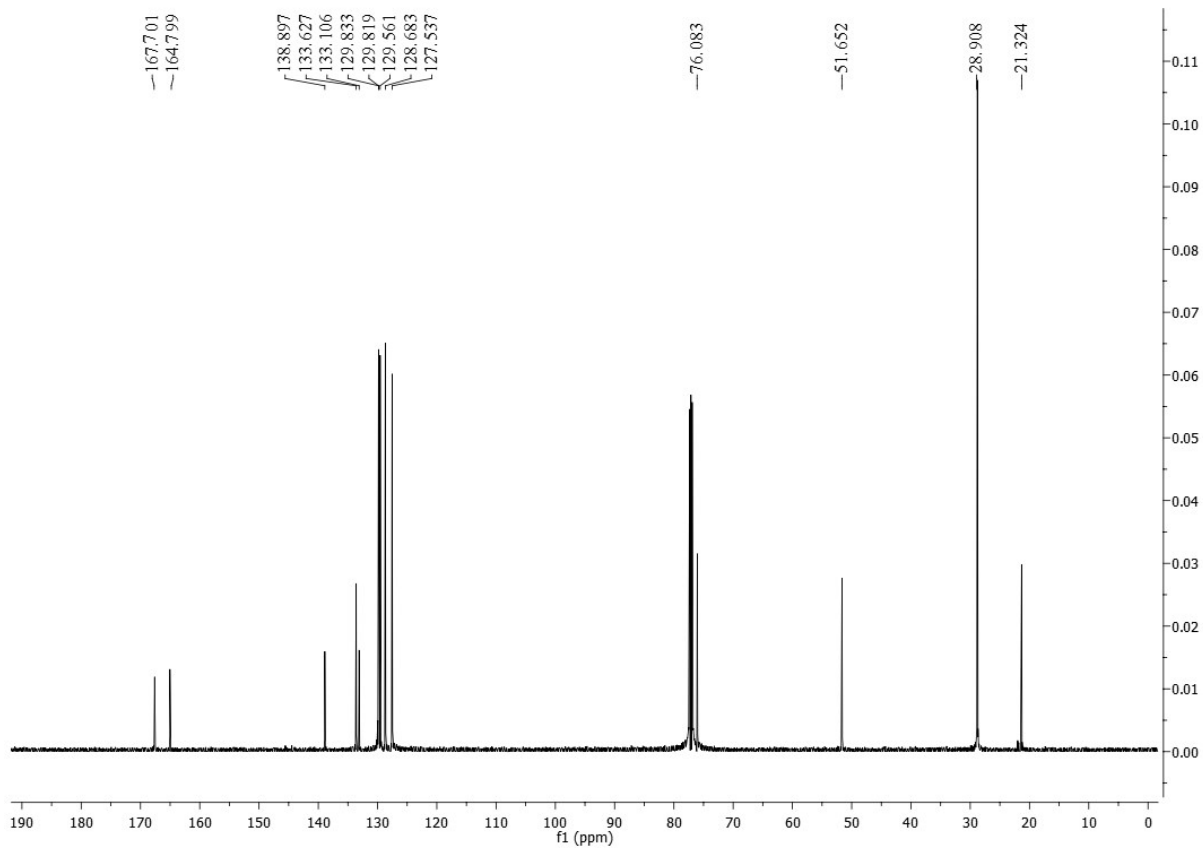

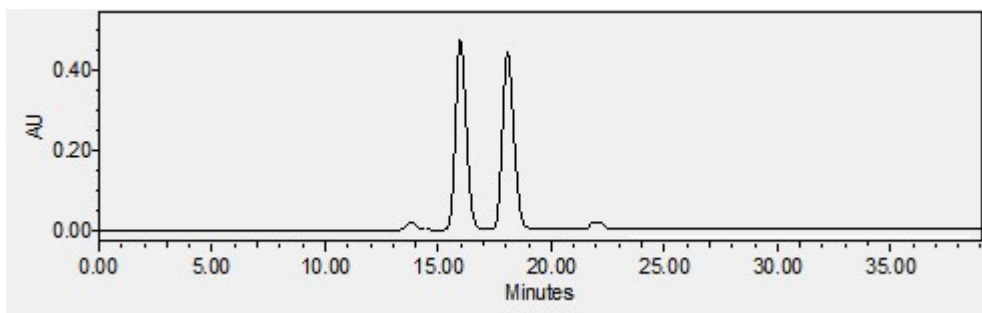

|   | Name | Retention Time | Area     | % Area | Height | Int Type | Amount | Units | Peak Type | Peak Codes |
|---|------|----------------|----------|--------|--------|----------|--------|-------|-----------|------------|
| 1 |      | 16.065         | 11176566 | 49.35  | 325050 | bb       |        |       | Unknown   |            |
| 2 |      | 18.118         | 11468735 | 50.65  | 307841 | bb       |        |       | Unknown   |            |

**2-(*tert*-butylamino)-2-oxo-1-(4-tolyl)ethyl benzoate (15e): racemate**

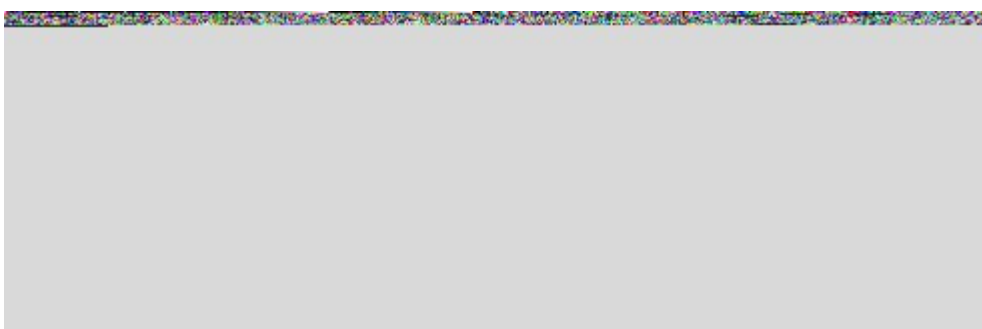

|   | Name | Retention Time | Area     | % Area | Height | Int Type | Amount | Units | Peak Type | Peak Codes |
|---|------|----------------|----------|--------|--------|----------|--------|-------|-----------|------------|
| 1 |      | 16.294         | 169151   | 1.19   | 575    | bb       |        |       | Unknown   |            |
| 2 |      | 18.009         | 14033694 | 98.81  | 321843 | bb       |        |       | Unknown   |            |

**2-(*tert*-butylamino)-2-oxo-1-(4-tolyl)ethyl benzoate (15e): in the presence of chiral catalyst 11.**

**(E)-1-(tert-butylamino)-1-oxo-4-phenylbut-3-en-2-yl benzoate (15f):**

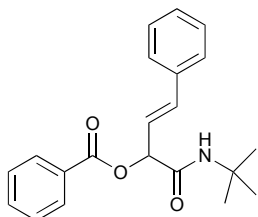

White solid (289 mg, 86% yield); mp 145–146°C (from EtOH). Found: C, 74.51; H, 6.52; N 4.31. Calc. for C<sub>21</sub>H<sub>23</sub>NO<sub>3</sub>: C, 74.75; H, 6.87; N, 4.15. 92.7% ee, determined by chiral stationary phase HPLC analysis (Daicel Chiralpack IG-SFC) isopropanol/hexane = 20/80, 1.0 mL/min, λ = 230 nm, t<sub>R</sub> (minor) = 17.4 min, t<sub>R</sub> (major) = 18.6 min.  $\nu_{\max}/\text{cm}^{-1}$  3278 (NH), 1724, 1661 (CO).  $\delta_{\text{H}}$  (600 MHz, CDCl<sub>3</sub>) 8.12–8.11 (m, 2H), 7.50–7.47 (m, 2H), 7.41–7.39 (m, 3H), 7.31–7.29 (m, 3H), 6.79 (d,  $J = 16.2$  Hz, 1H), 6.41 (dd,  $J_1 = 16.2$  Hz,  $J_2 = 7.2$  Hz, 1H), 5.98 (br s, 1H), 5.90 (dd,  $J_1 = 7.2$  Hz,  $J_2 = 1.8$  Hz, 1H), 1.38 (s, 9H).  $\delta_{\text{C}}$  (150 MHz, CDCl<sub>3</sub>) 167.3, 165.5, 135.9, 134.7, 133.7, 129.9, 129.2, 128.8, 128.7, 128.4, 126.9, 122.9, 75.1, 51.2, 28.9.  $m/z$ : 337 (M<sup>+</sup>, 1%), 238 (20), 105 (100). HRMS (ESI,  $m/z$ ): 338.18 (M+H<sup>+</sup>).

**15f** is known in the literature, however no physical and spectral data are reported.

H. Yu, T. Gai, W. L. Sun and M. S. Zhang, *Chin. Chem. Lett.*, 2011, **22**, 379–381.

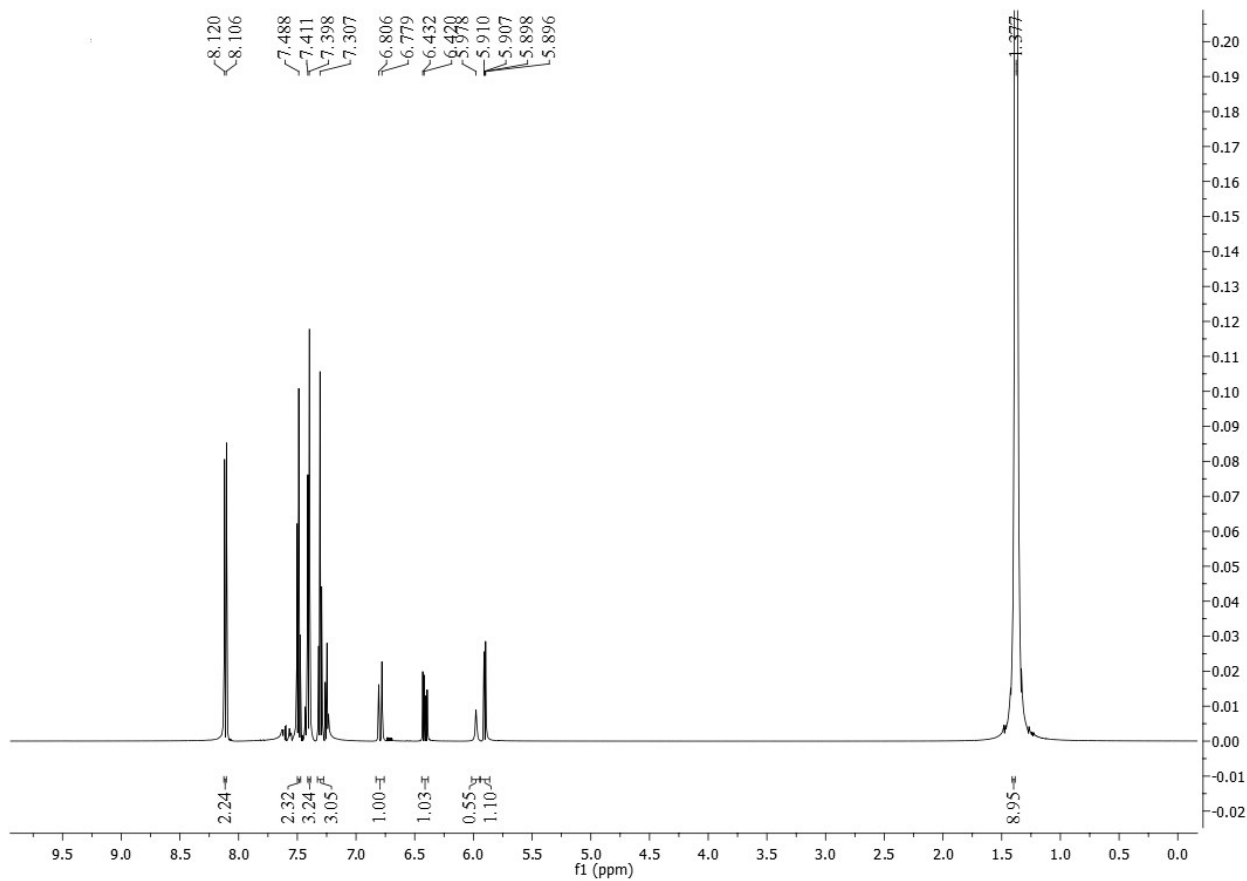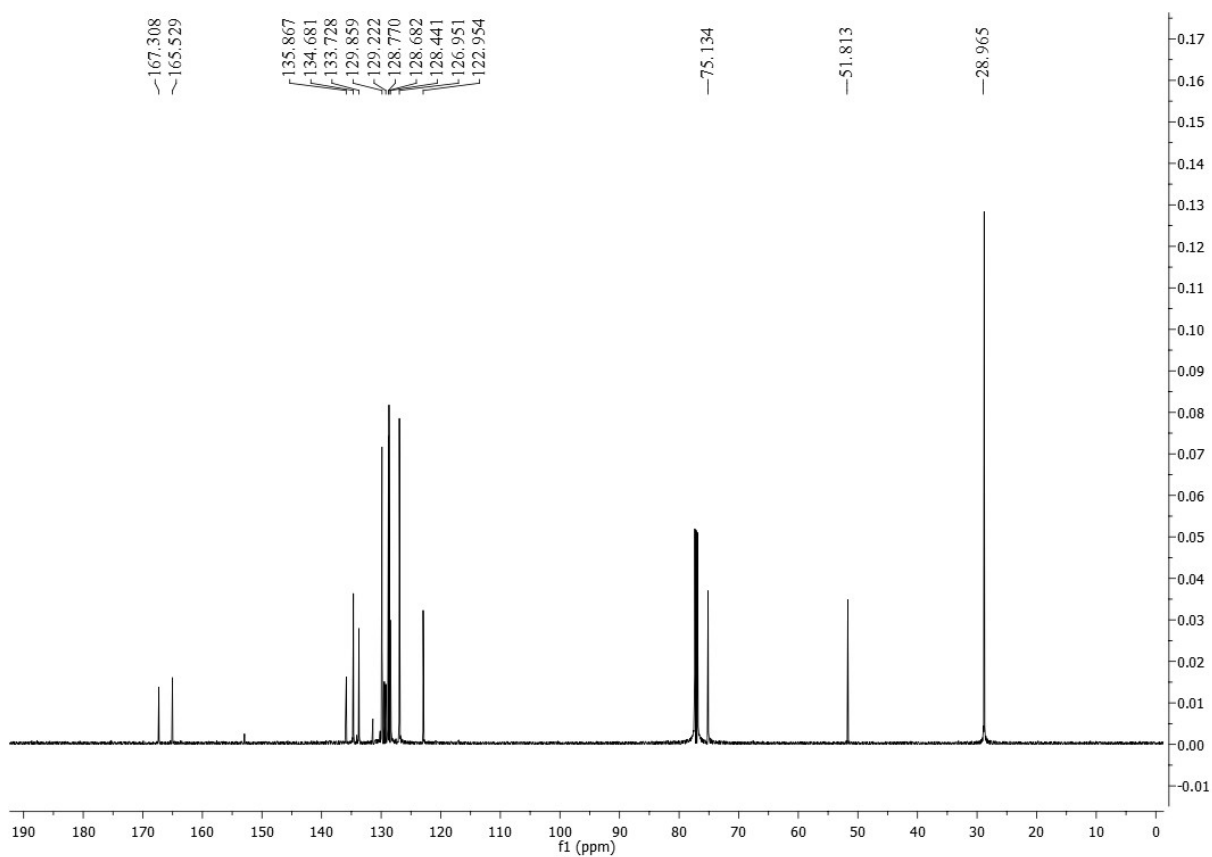



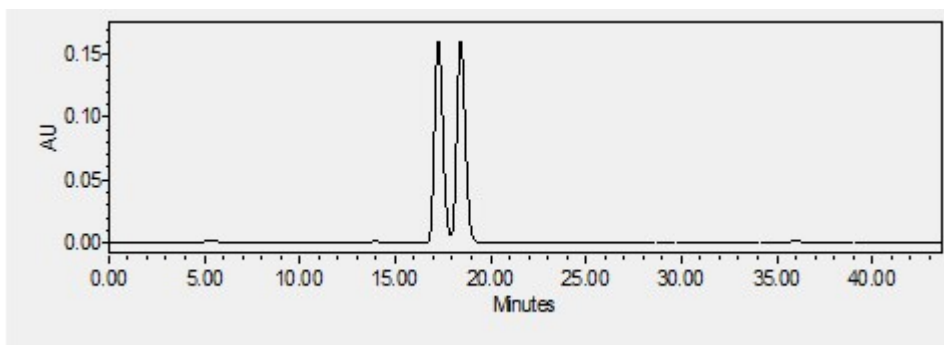

|   | Name | Retention Time | Area    | % Area | Height | Int Type | Amount | Units | Peak Type | Peak Codes |
|---|------|----------------|---------|--------|--------|----------|--------|-------|-----------|------------|
| 1 |      | 16.995         | 8128663 | 49.97  | 318451 | bb       |        |       | Unknown   |            |
| 2 |      | 18.890         | 8139009 | 50.03  | 315473 | bb       |        |       | Unknown   |            |

**(E)-1-(tert-butylamino)-1-oxo-3-phenylbut-3-en-2-yl benzoate (15f):  
racemate**

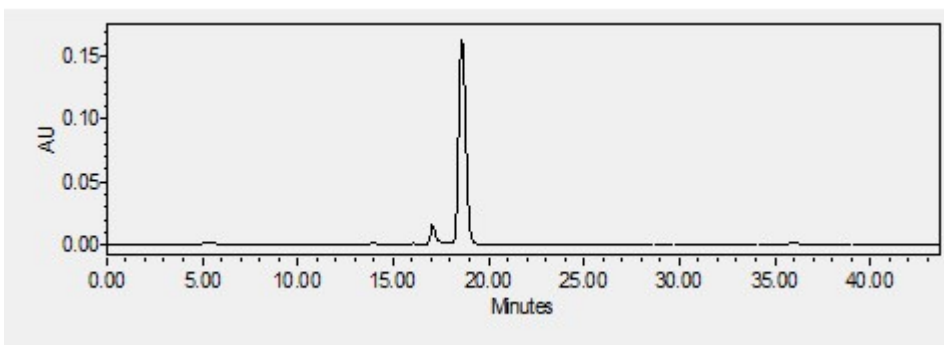

|   | Name | Retention Time | Area    | % Area | Height | Int Type | Amount | Units | Peak Type | Peak Codes |
|---|------|----------------|---------|--------|--------|----------|--------|-------|-----------|------------|
| 1 |      | 17.359         | 323946  | 3.63   | 676    | bb       |        |       | Unknown   |            |
| 2 |      | 18.599         | 8587991 | 96.37  | 319168 | bb       |        |       | Unknown   |            |

**(E)-1-(tert-butylamino)-1-oxo-4-phenylbut-3-en-2-yl benzoate (15f): in the presence of chiral catalyst 11.**

**1-(*tert*-butylamino)-3-methyl-1-oxobut-2-yl benzoate (15g):**

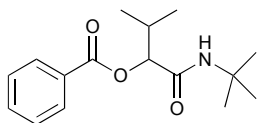

White solid (241 mg, 87% yield); mp 155–156°C (from EtOH). Found: C, 68.99; H, 8.52; N 4.88. Calc. for C<sub>16</sub>H<sub>23</sub>NO<sub>3</sub>: C, 69.29; H, 8.36; N, 5.05. 95.5% ee, determined by chiral stationary phase HPLC analysis (Daicel Chiralpack IG-SFC) isopropanol/hexane = 20/80, 1.0 mL/min, λ = 230 nm, t<sub>R</sub> (minor) = 11.5 min, t<sub>R</sub> (major) = 13.1 min.  $\nu_{\max}/\text{cm}^{-1}$  3278 (NH), 1724, 1661 (CO).  $\delta_{\text{H}}$  (600 MHz, CDCl<sub>3</sub>) 8.07–8.06 (m, 2H), 8.07–8.06 (m, 2H), 7.62–7.59 (m, 1H), 7.49–7.46 (m, 2H), 5.82 (br s, 1H), 5.18 (d,  $J=4.2$  Hz, 1H), 2.46–2.40 (m, 1H), 1.33 (s, 9H), 1.02 (d,  $J=6.6$  Hz, 3H), 0.98 (d,  $J=6.6$  Hz, 3H).  $\delta_{\text{C}}$  (150 MHz, CDCl<sub>3</sub>) 168.5, 165.4, 133.6, 129.7, 129.6, 128.7, 78.7, 51.8, 30.7, 28.7, 19.0, 16.9.  $m/z$ : 277 (M<sup>+</sup>, 1%), 178 (20), 123 (25), 105 (100). HRMS (ESI,  $m/z$ ): 278.18 (M+H<sup>+</sup>).

**15g** is known in the literature, however no physical and spectral data are reported.

A. J. Clark, Y. S. S. Al Faiyz, D. Patel and M. J. Broadhurst, *Tetrahedron Lett.*, 2001, **42**, 2007–2009.

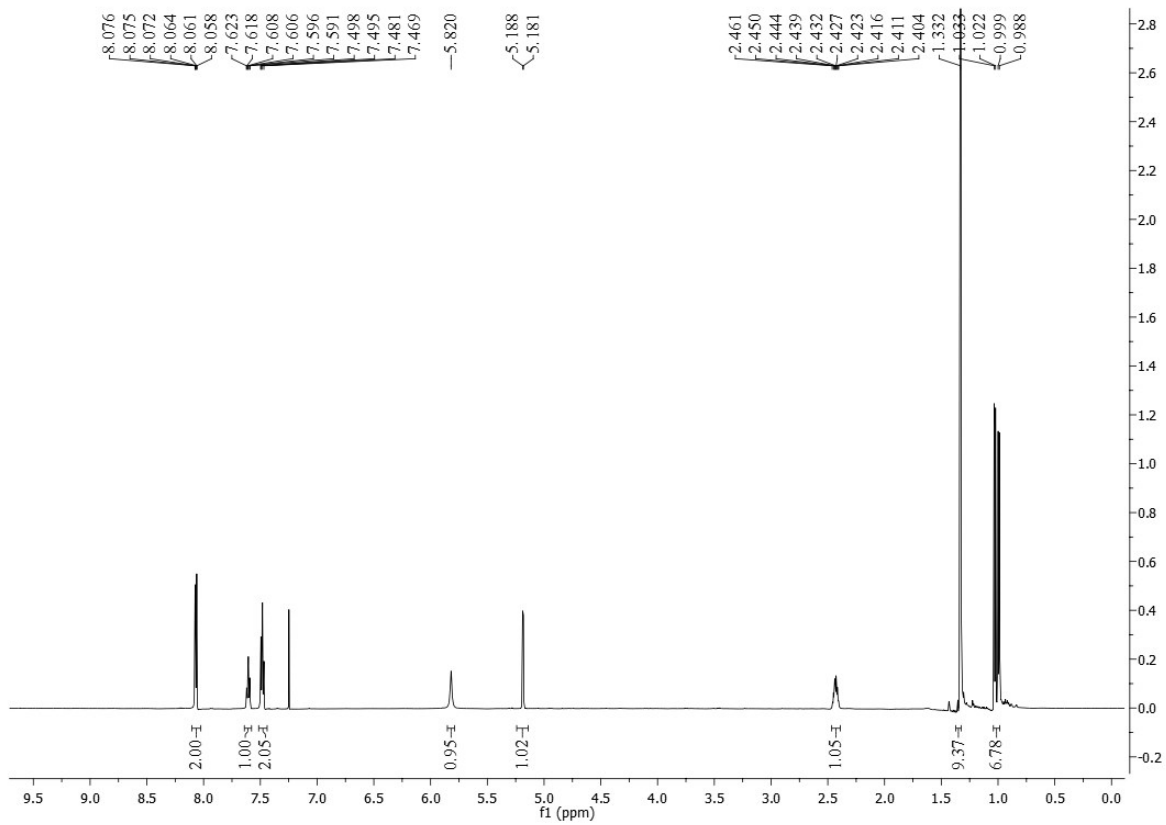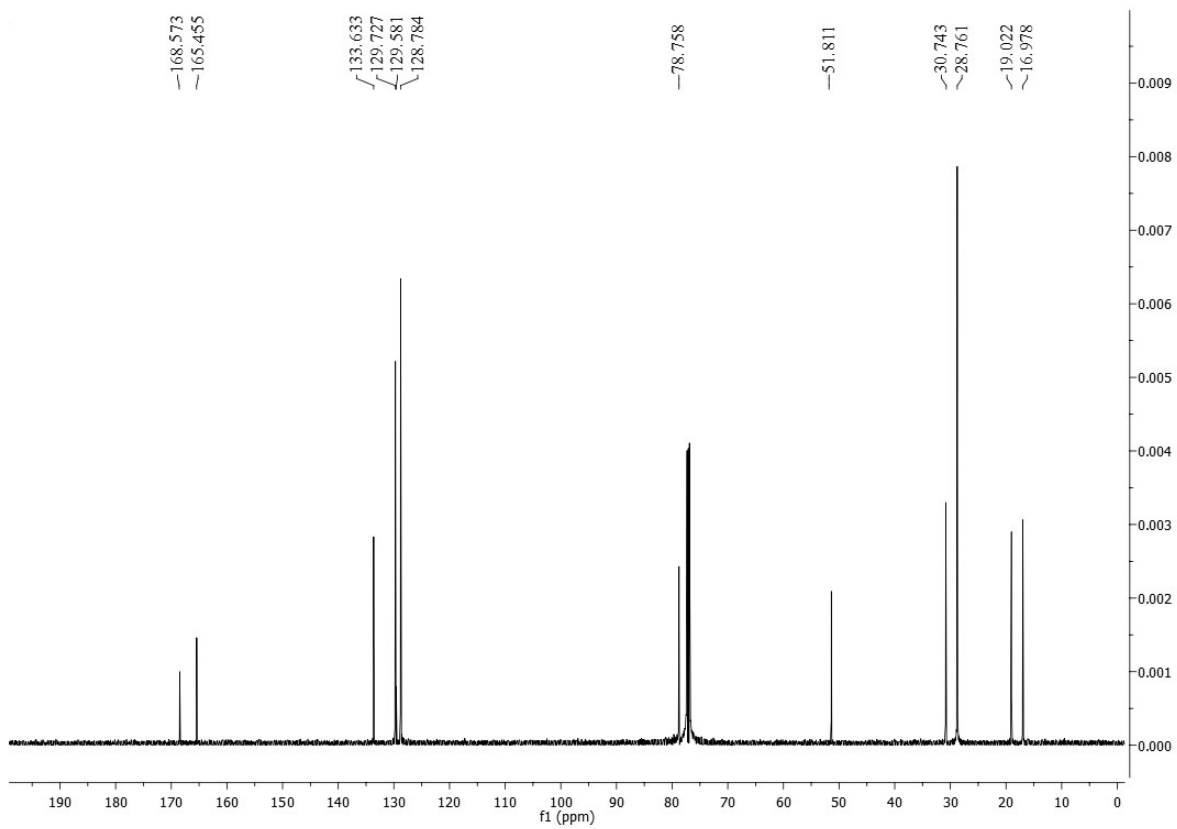

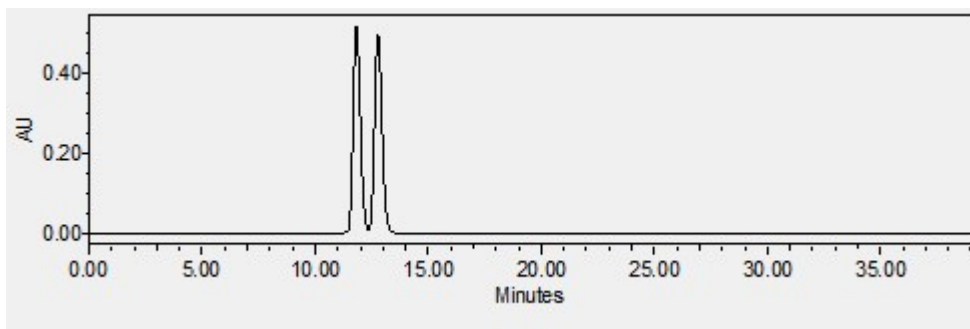

|   | Name | Retention Time | Area     | % Area | Height | Int Type | Amount | Units | Peak Type | Peak Codes |
|---|------|----------------|----------|--------|--------|----------|--------|-------|-----------|------------|
| 1 |      | 11.834         | 13848262 | 49.82  | 699175 | bb       |        |       | Unknown   |            |
| 2 |      | 13.134         | 13945773 | 50.18  | 669843 | bb       |        |       | Unknown   |            |

**1-(*tert*-butylamino)-3-methyl-1-oxobut-2-yl benzoate (15g): racemate**

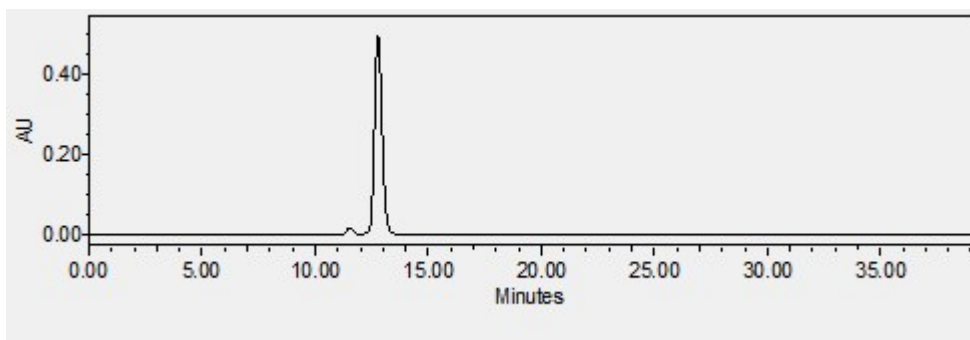

| Name | Retention Time | Area     | % Area | Height | Int Type | Amount | Units | Peak Type | Peak Codes |
|------|----------------|----------|--------|--------|----------|--------|-------|-----------|------------|
|      | 11.508         | 651329   | 2.23   | 875    | bb       |        |       | Unknown   |            |
|      | 13.086         | 28500124 | 97.77  | 667746 | bb       |        |       | Unknown   |            |

**1-(*tert*-butylamino)-3-methyl-1-oxobut-2-yl benzoate (15g): in the presence of chiral catalyst 11.**

**2-(*tert*-butylamino)-2-oxo-1-phenylethyl 4-nitrobenzoate (15h):**

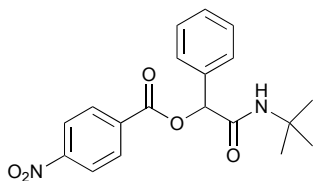

White solid (300 mg, 84% yield); mp 137–138 °C (from EtOH; lit. 136–137°C). 95.5% ee, determined by chiral stationary phase HPLC analysis (Daicel Chiralpack IG-SFC) isopropanol/hexane = 10/90, 1.0 mL/min,  $\lambda = 254$  nm,  $t_R$  (minor) = 23.7 min,  $t_R$  (major) = 25.8 min.  $\nu_{\max}/\text{cm}^{-1}$  3290 (NH), 1727, 1650 (CO).  $\delta_H$  (600 MHz,  $\text{CDCl}_3$ ) 8.30–8.24 (m, 4H), 7.52–7.50 (m, 3H), 7.42–7.41 (m, 2H), 6.21 (br s, 1H) 6.16 (s, 1H), 1.34 (s, 9H).  $\delta_C$  (150 MHz,  $\text{CDCl}_3$ ) 166.7, 163.6, 150.8, 135.1, 134.9, 131.1, 129.8, 129.1, 127.8, 123.7, 76.1, 51.8, 28.8.  $m/z$ : 356 ( $M^+$ , 1%), 257 (65), 150 (100). HRMS (ESI,  $m/z$ ): 357.15 ( $M+H^+$ ).

L. A. Polindara-Garcia and E. Juaristi, *Eur. J. Org. Chem.*, 2016, 1095–1102.

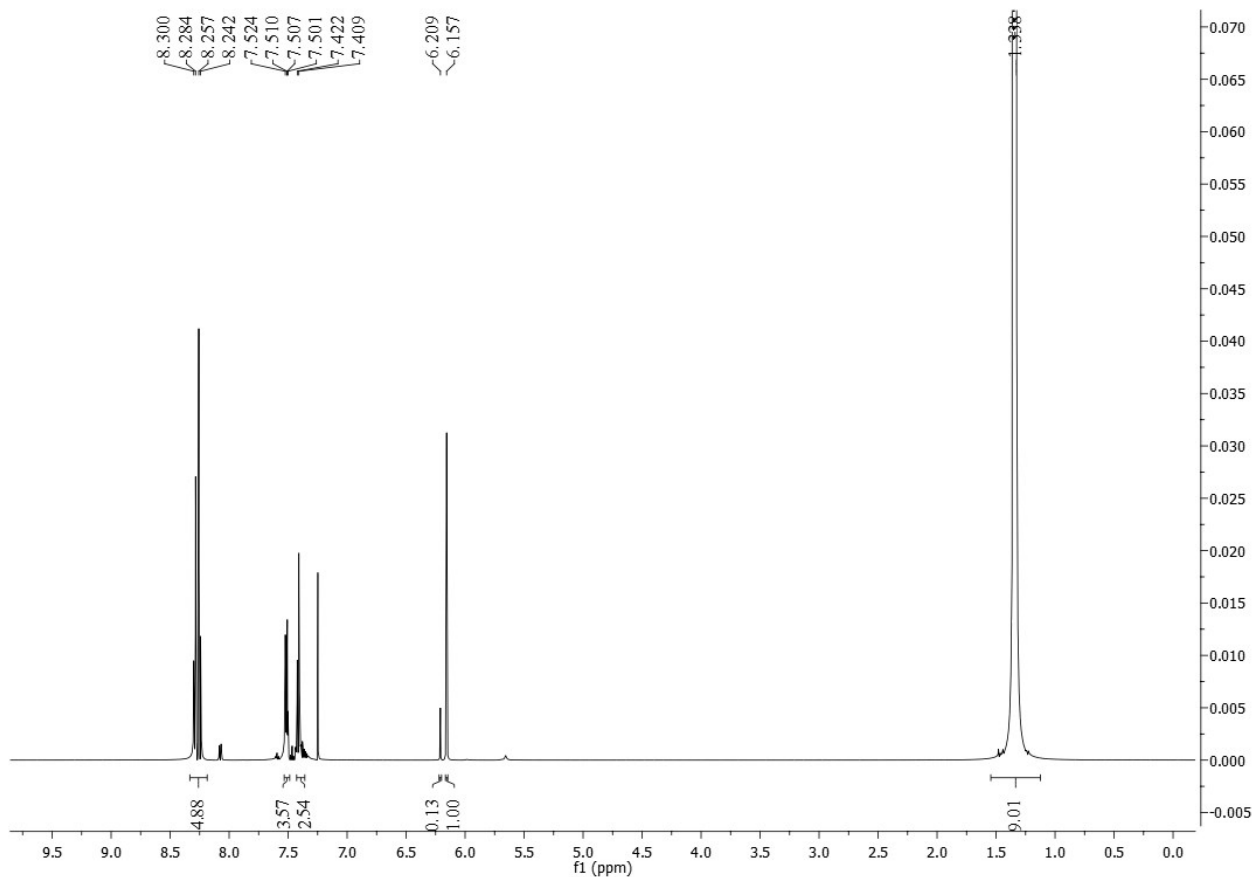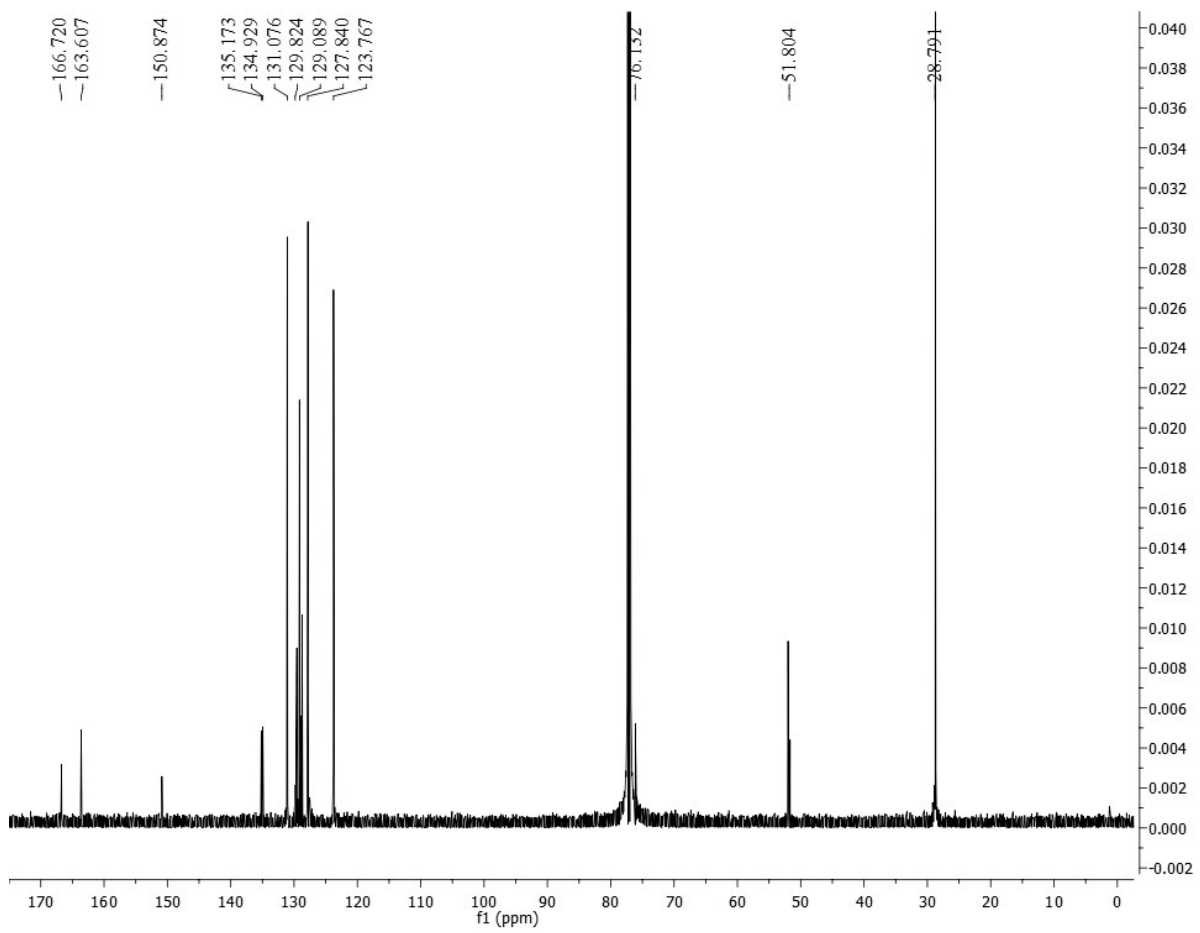

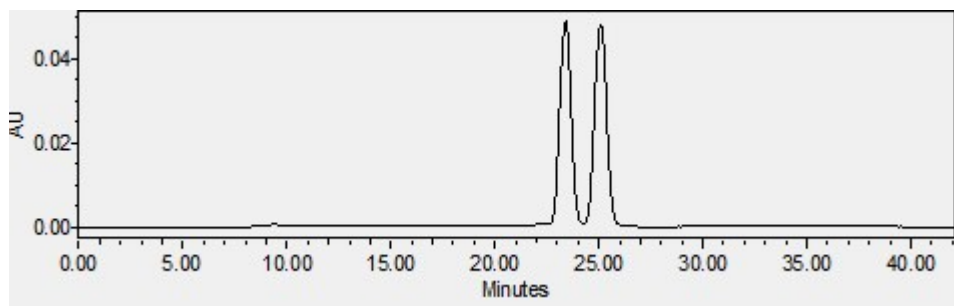

| Name | Retention Time | Area    | % Area | Height  | Int Type | Amount | Units | Peak Type | Peak Codes |
|------|----------------|---------|--------|---------|----------|--------|-------|-----------|------------|
|      | 19.846         | 3996129 | 49.88  | 1047602 | bb       |        |       | Unknown   |            |
|      | 21.541         | 4015433 | 50.12  | 1035292 | bb       |        |       | Unknown   |            |

**2-(*tert*-butylamino)-2-oxo-1-phenylethyl 4-nitrobenzoate (15h): racemate**

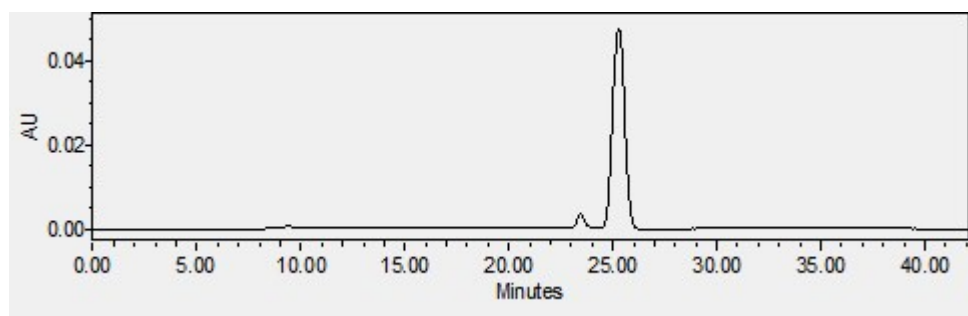

| Name | Retention Time | Area    | % Area | Height  | Int Type | Amount | Units | Peak Type | Peak Codes |
|------|----------------|---------|--------|---------|----------|--------|-------|-----------|------------|
| 1    | 23.646         | 120490  | 2.25   | 1060    | bb       |        |       | Unknown   |            |
| 2    | 25.881         | 5238635 | 97.75  | 1056782 | bb       |        |       | Unknown   |            |

**2-(*tert*-butylamino)-2-oxo-1-phenylethyl 4-nitrobenzoate (15h): in the presence of chiral catalyst 11.**

**2-(*tert*-butylamino)-2-oxo-1-phenylethyl 4-methoxybenzoate (15i):**

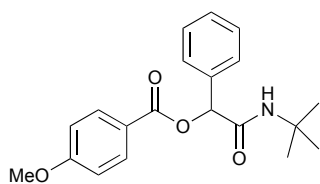

White solid (298 mg, 87% yield); mp 147–148 °C (from EtOH). Found: C, 70.65; H, 6.71; N 4.29. Calc. for  $C_{20}H_{23}NO_4$ : C, 70.36; H, 6.79; N, 4.10. 95.9% ee, determined by chiral stationary phase HPLC analysis (Daicel Chiralpack IG-SFC) isopropanol/hexane = 10/90, 1.0 mL/min,  $\lambda$  = 254 nm,  $t_R$  (minor) = 18.8 min,  $t_R$  (major) = 20.8 min.  $\nu_{\max}/\text{cm}^{-1}$  3281 (NH), 1729, 1654 (CO).  $\delta_H$  (600 MHz,  $CDCl_3$ ) 8.03 (d,  $J$  = 9.0 Hz, 2H), 7.52–7.50 (m, 2H), 7.39–7.32 (m, 3H), 6.93 (d,  $J$  = 9.0 Hz, 2H), 6.20 (s, 1H), 6.03 (br s, 1H), 3.85 (s, 3H), 1.36 (s, 9H).  $\delta_C$  (150 MHz,  $CDCl_3$ ) 167.8, 164.9, 163.9, 133.7, 129.8, 128.9, 128.86, 128.80, 128.7, 114.3, 75.5, 55.7, 51.8, 29.5.  $m/z$ : 341 ( $M^+$ , 1%), 242 (15), 135 (100). HRMS (ESI,  $m/z$ ): 342.17 ( $M+H^+$ ).



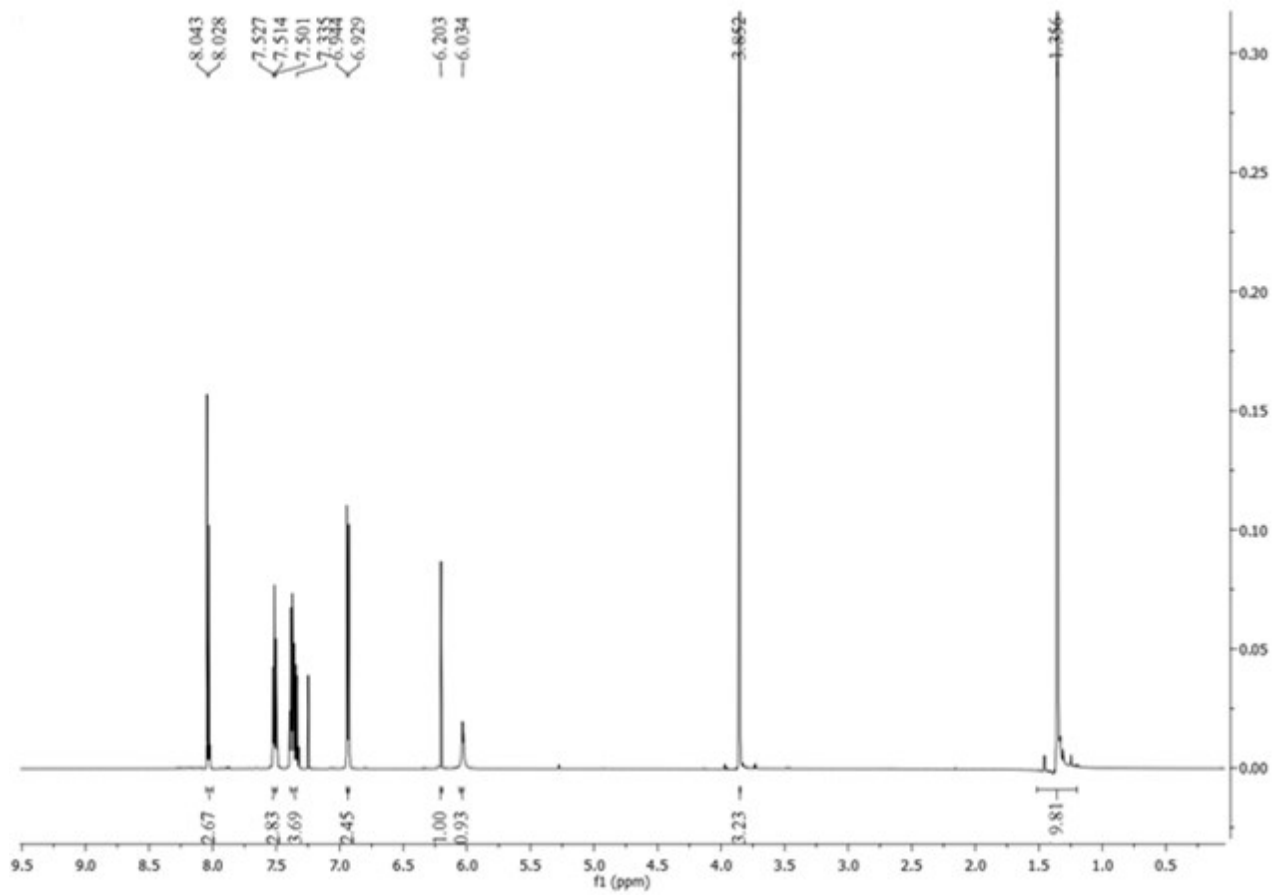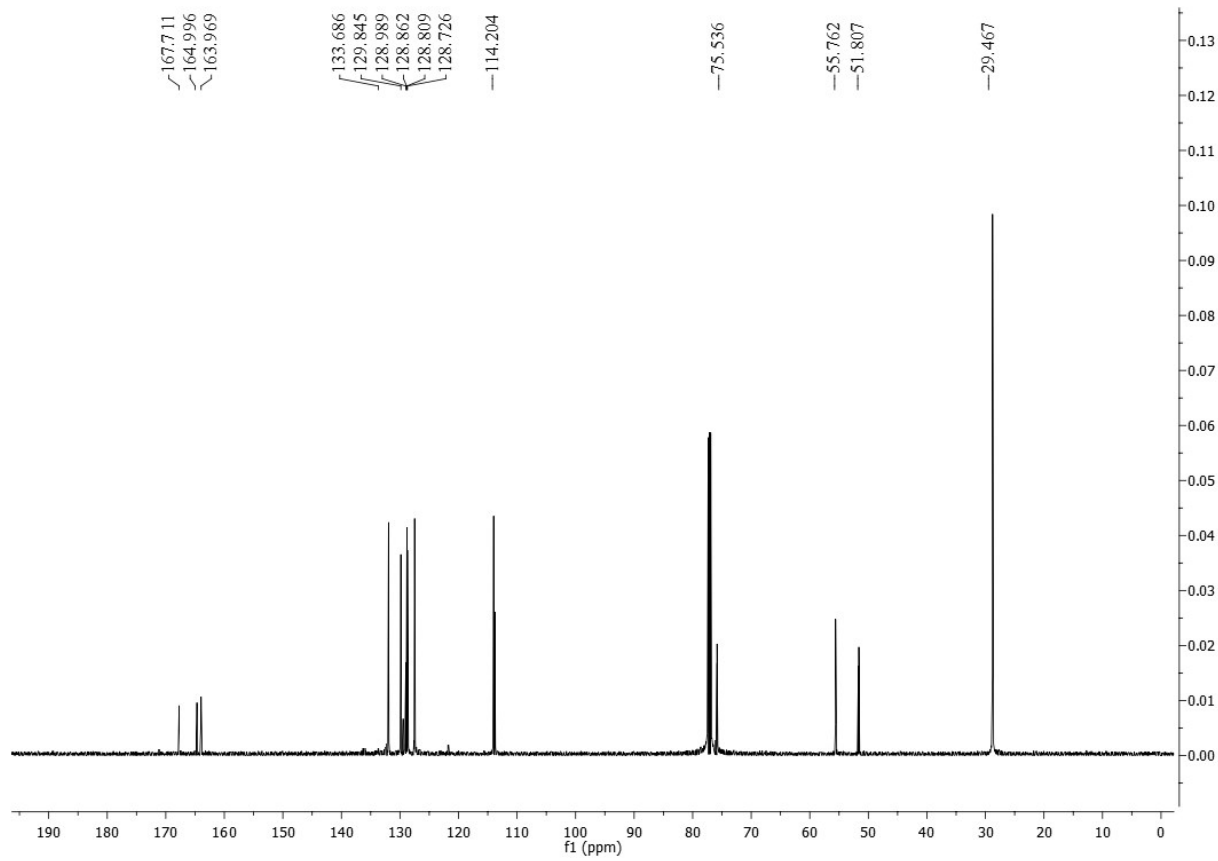

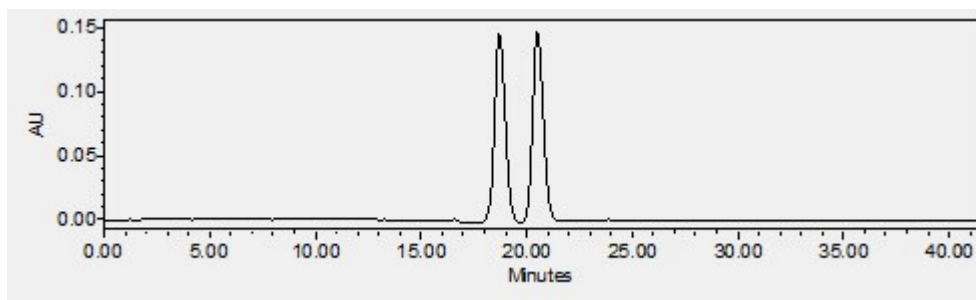

|   | Name | Retention Time | Area     | % Area | Height | Int Type | Amount | Units | Peak Type | Peak Codes |
|---|------|----------------|----------|--------|--------|----------|--------|-------|-----------|------------|
| 1 |      | 18.521         | 22884556 | 49.92  | 316771 | bb       |        |       | Unknown   |            |
| 2 |      | 20.994         | 22958899 | 50.08  | 317841 | bb       |        |       | Unknown   |            |

**2-(*tert*-butylamino)-2-oxo-1-phenylethyl 4-methoxybenzoate (15i): racemate**

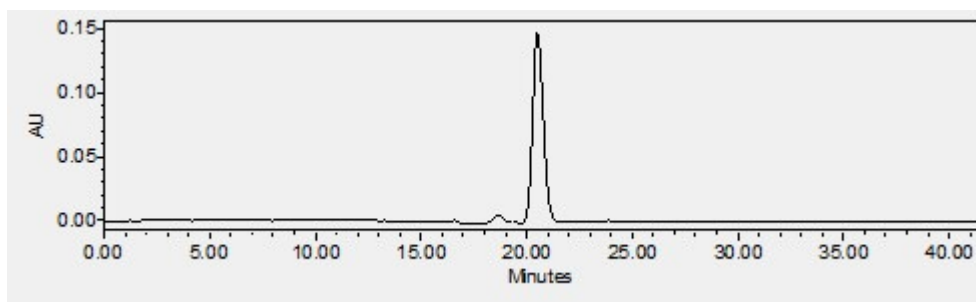

|   | Name | Retention Time | Area     | % Area | Height | Int Type | Amount | Units | Peak Type | Peak Codes |
|---|------|----------------|----------|--------|--------|----------|--------|-------|-----------|------------|
| 1 |      | 18.774         | 270012   | 2.07   | 550    | bb       |        |       | Unknown   |            |
| 2 |      | 20.845         | 12768735 | 97.93  | 318913 | bb       |        |       | Unknown   |            |

**2-(*tert*-butylamino)-2-oxo-1-phenylethyl 4-methoxybenzoate (15i): in the presence of chiral catalyst 11.**

**2-(*tert*-butylamino)-2-oxo-1-phenylethyl 4-chlorobenzoate (15j):**

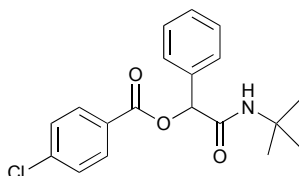

White solid (312 mg, 90% yield); mp 139–140°C (from EtOH; lit. 142–143 °C). 96.8% ee, determined by chiral stationary phase HPLC analysis (Daicel Chiralpack IG-SFC) isopropanol/hexane = 10/90, 1.0 mL/min,  $\lambda = 230$  nm,  $t_R$  (minor) = 18.9 min,  $t_R$  (major) = 19.9 min.  $\nu_{\max}/\text{cm}^{-1}$  3281 (NH), 1729, 1654 (CO).  $\delta_H$  (600 MHz,  $\text{CDCl}_3$ ) 8.01 (d,  $J = 9.0$  Hz, 2H), 7.51–7.49 (m, 2H), 7.42 (d,  $J = 9.0$  Hz, 2H), 7.39–7.35 (m, 3H), 6.17 (s, 1H), 5.84 (br s, 1H), 1.34 (s, 9H).  $\delta_C$  (150 MHz,  $\text{CDCl}_3$ ) 167.2, 164.3, 140.2, 135.8, 131.2, 129.1, 129.0, 128.9, 127.9, 127.6, 76.3, 51.7, 28.9.  $m/z$ : 345 ( $M^+$ , 1%), 246 (35), 139 (100). HRMS (ESI,  $m/z$ ): 346.13 ( $M+H^+$ ).

L. A. Polindara-Garcia and E. Juaristi, *Eur. J. Org. Chem.*, 2016, 1095–1102.

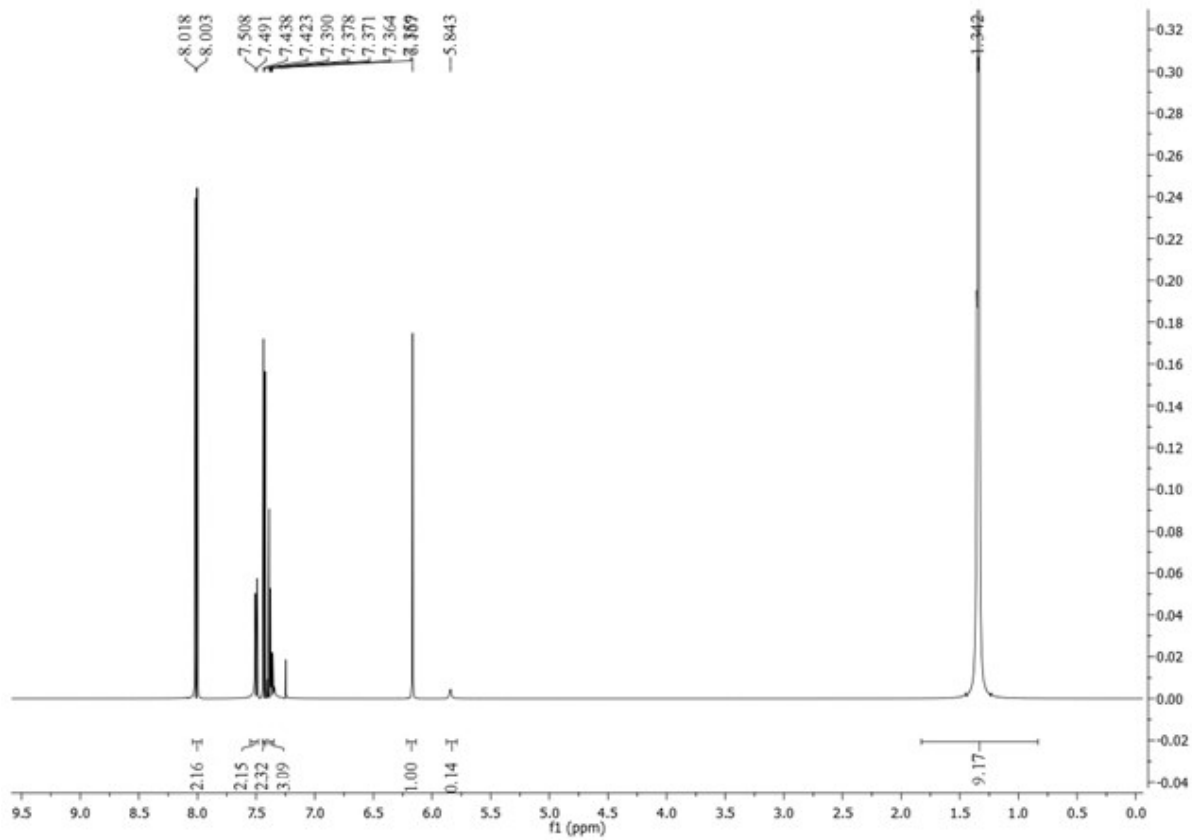

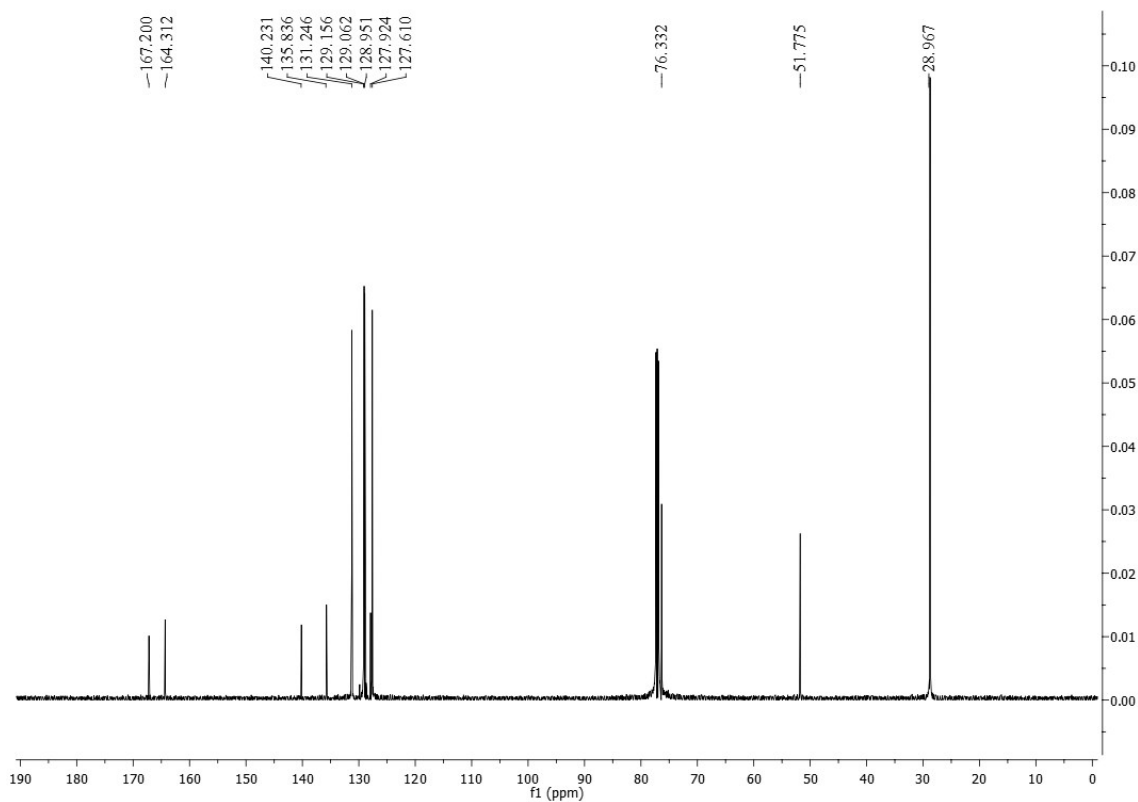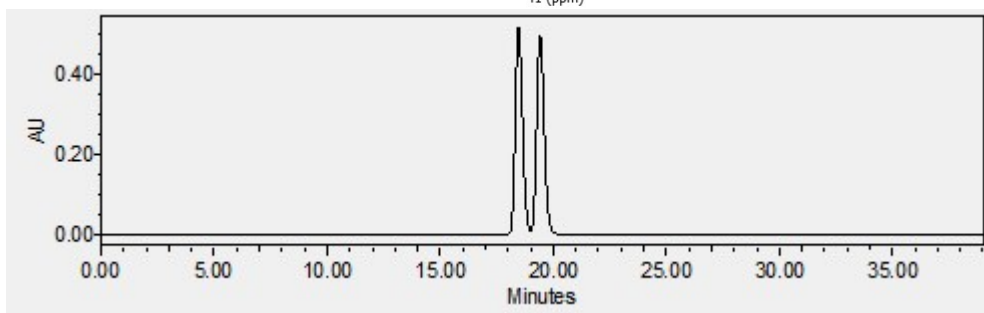

| Name | Retention Time | Area     | % Area | Height | Int Type | Amount | Units | Peak Type | Peak Codes |
|------|----------------|----------|--------|--------|----------|--------|-------|-----------|------------|
| 1    | 18.364         | 14969151 | 49.89  | 699175 | bb       |        |       | Unknown   |            |
| 2    | 19.556         | 15034694 | 50.11  | 669843 | bb       |        |       | Unknown   |            |

**2-(*tert*-butylamino)-2-oxo-1-phenylethyl 4-chlorobenzoate (15j): racemate.**

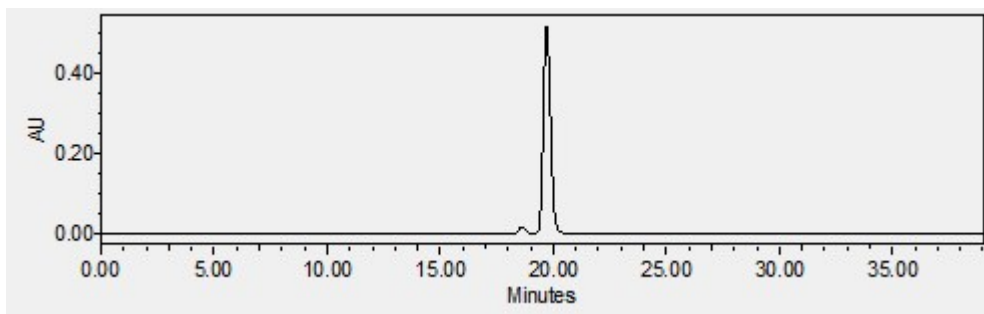

| Name | Retention Time | Area     | % Area | Height | Int Type | Amount | Units | Peak Type | Peak Codes |
|------|----------------|----------|--------|--------|----------|--------|-------|-----------|------------|
| 1    | 18.869         | 329151   | 1.62   | 305    | bb       |        |       | Unknown   |            |
| 2    | 19.995         | 20039595 | 98.38  | 626555 | bb       |        |       | Unknown   |            |

**2-(*tert*-butylamino)-2-oxo-1-phenylethyl 4-chlorobenzoate (15j):** in the presence of chiral catalyst 11.

**2-(*tert*-butylamino)-2-oxo-1-phenylethyl acetate (15k):**

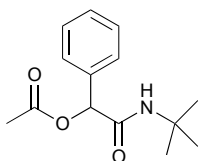

White solid (215 mg, 86% yield); mp 79–80°C (from EtOH; lit. 77 °C). 96.5% ee, determined by chiral stationary phase HPLC analysis (Daicel Chiralpack IG-SFC) isopropanol/hexane = 10/90, 1.0 mL/min,  $\lambda = 214$  nm,  $t_R$  (minor) = 11.1 min,  $t_R$  (major) = 12.9 min.  $\nu_{\max}/\text{cm}^{-1}$  3283 (NH), 1721, 1650 (CO).  $\delta_H$  (600 MHz,  $\text{CDCl}_3$ ) 7.49–7.31 (m, 5H), 5.94 (s, 1H), 5.87 (br s, 1H), 2.16 (s, 3H), 1.35 (s, 9H).  $\delta_C$  (150 MHz,  $\text{CDCl}_3$ ) 169.4, 167.4, 136.2, 128.9, 128.8, 127.5, 75.7, 51.6, 29.0, 21.3.  $m/z$ : 249 ( $M^+$ , 1%), 150 (70), 107 (100), 57 (35), 43 (35). HRMS (ESI,  $m/z$ ): 250.14 ( $M+H^+$ ).

T. Nguansavanah and J. Zhu, *Angew. Chem. Int. Ed.*, 2006, **45**, 3495–3497.

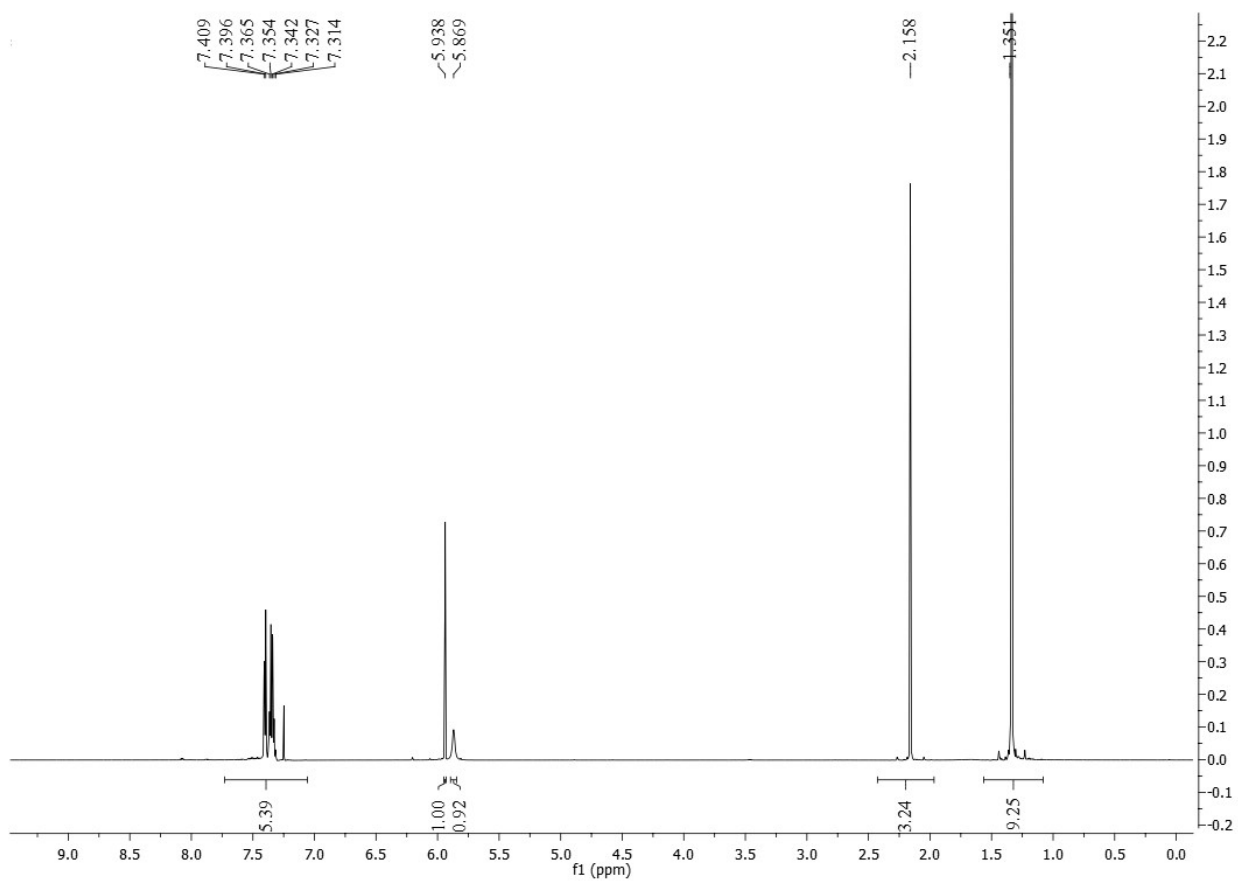

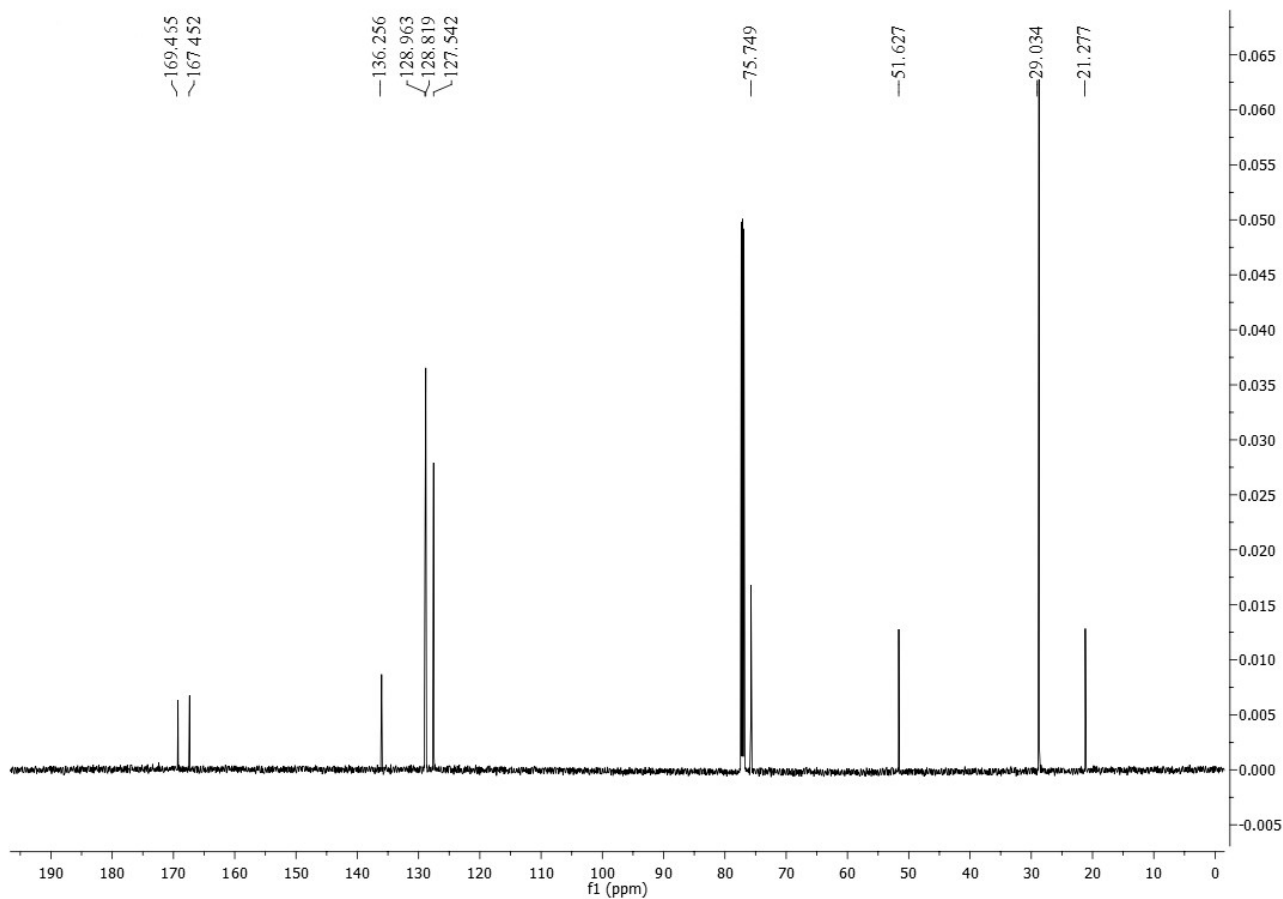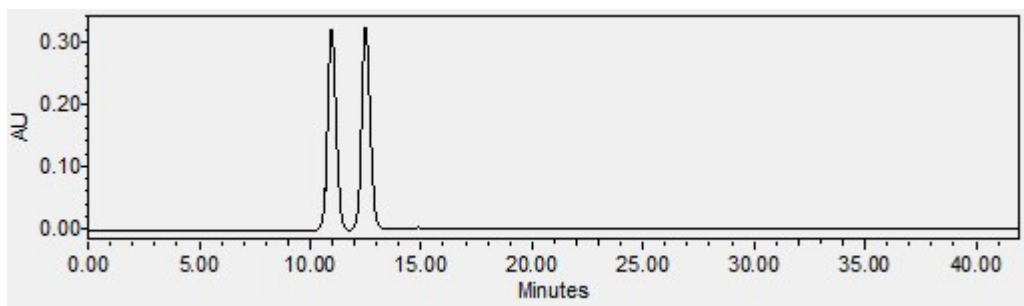

| Name | Retention Time | Area    | % Area | Height | Int Type | Amount | Units | Peak Type | Peak Codes |
|------|----------------|---------|--------|--------|----------|--------|-------|-----------|------------|
| 1    | 11.095         | 5371234 | 50.04  | 799158 | bb       |        |       | Unknown   |            |
| 2    | 12.976         | 5362908 | 49.96  | 800156 | bb       |        |       | Unknown   |            |

**2-(*tert*-butylamino)-2-oxo-1-phenylethyl acetate (15k): racemate**



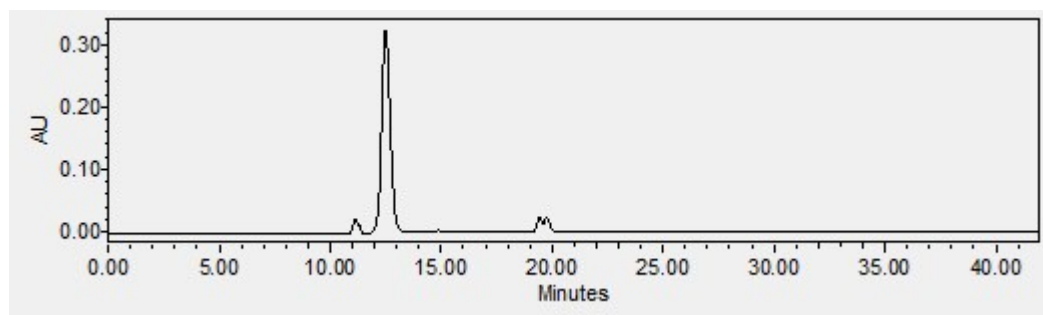

|   | Name | Retention Time | Area   | % Area | Height | Int Type | Amount | Units | Peak Type | Peak Codes |
|---|------|----------------|--------|--------|--------|----------|--------|-------|-----------|------------|
| 1 |      | 11.105         | 11125  | 1.75   | 497    | bb       |        |       | Unknown   |            |
| 2 |      | 12.987         | 623212 | 98.25  | 789157 | bb       |        |       | Unknown   |            |

**2-(*tert*-butylamino)-2-oxo-1-phenylethyl acetate (15k):** in the presence of chiral catalyst 11.

**2-(*tert*-butylamino)-2-oxo-1-phenylethyl 2-phenylacetate (15l):**

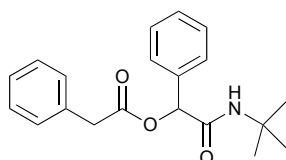

White solid (285 mg, 87% yield); mp 100–101°C (from EtOH). Found: C, 73.61; H, 7.40; N 4.35. Calc. for C<sub>20</sub>H<sub>23</sub>NO<sub>3</sub>: C, 73.82; H, 7.12; N, 4.30. 93.1% ee, determined by chiral stationary phase HPLC analysis (Daicel Chiralpack IG-SFC) isopropanol/hexane = 10/90, 1.0 mL/min, λ = 214 nm, t<sub>R</sub> (minor) = 16.4 min, t<sub>R</sub> (major) = 17.6 min. ν<sub>max</sub>/cm<sup>-1</sup> 3277 (NH), 1719, 1650 (CO). δ<sub>H</sub> (600 MHz, CDCl<sub>3</sub>) 7.37–7.30 (m, 10H), 5.97 (s, 1H), 5.68 (br s, 1H), 3.72 (s, 2H), 1.19 (s, 9H). δ<sub>C</sub> (150 MHz, CDCl<sub>3</sub>) 169.3,

167.3, 135.9, 133.5, 129.3, 129.0, 128.9, 128.7, 127.6, 127.4, 75.8, 51.4, 41.7, 28.7.  $m/z$ : 325 ( $M^+$ , 1%), 226 (40), 91 (100). HRMS (ESI,  $m/z$ ): 326.18 ( $M+H^+$ ).

**15I** is known in the literature, however no physical and spectral data are reported.

T. Bousquet, M. Jida, M. Soueidan, R. Deprez-Poulain, F. Agbossou-Niedercorn and L. Pelinski, *Tetrahedron Lett.*, 2012, **53**, 306–308.

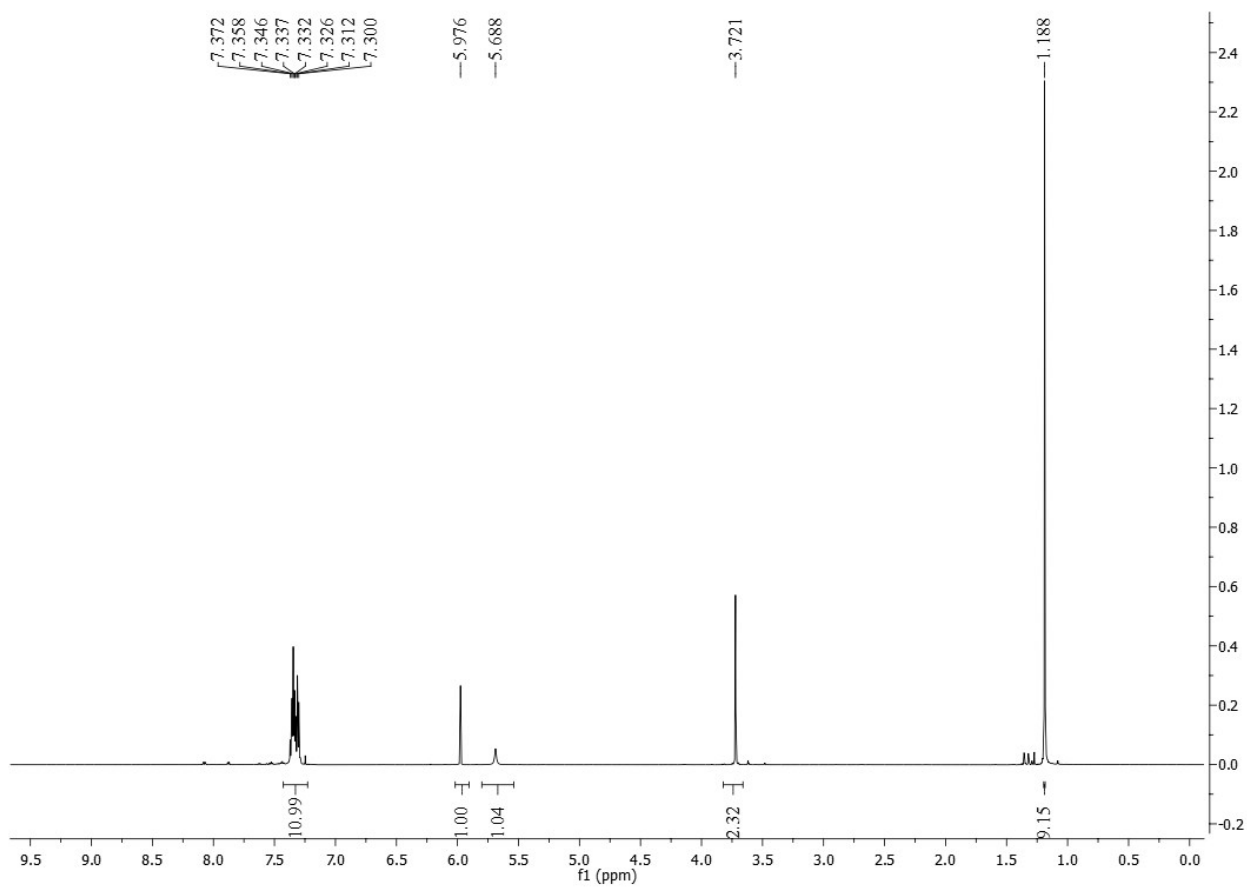

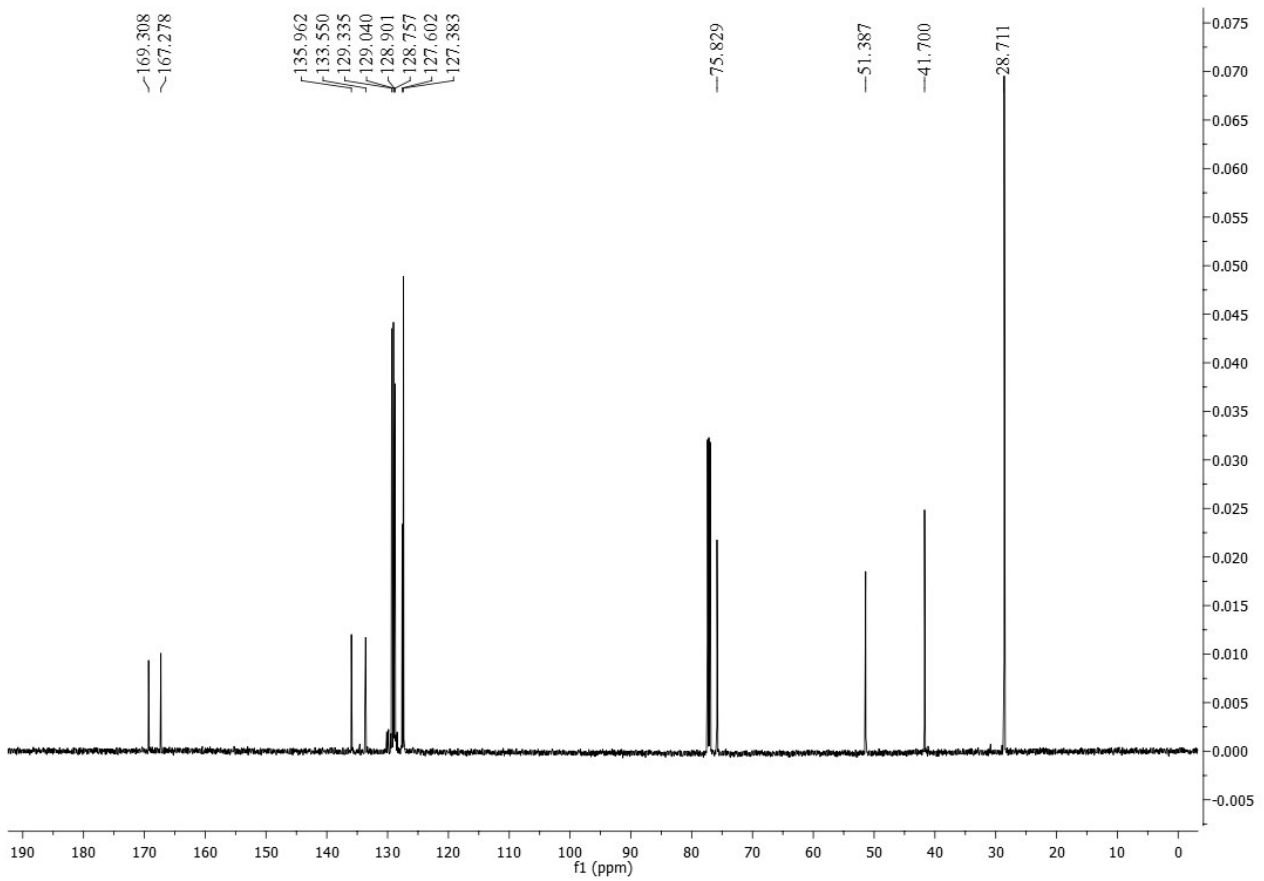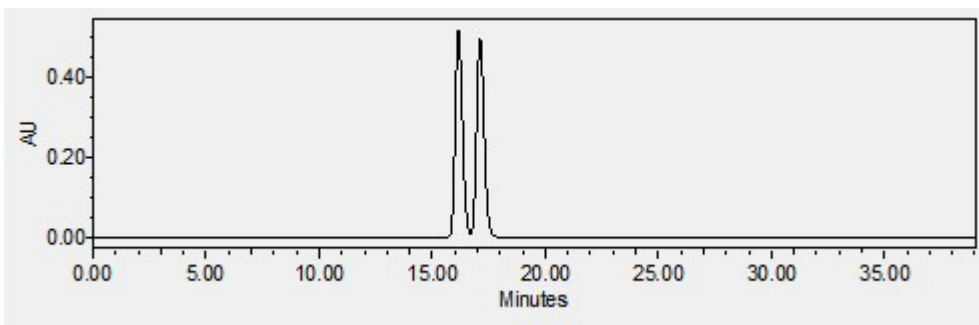

| Name | Retention Time | Area     | % Area | Height | Int Type | Amount | Units | Peak Type | Peak Codes |
|------|----------------|----------|--------|--------|----------|--------|-------|-----------|------------|
| 1    | 16.124         | 15768161 | 50.05  | 599145 | bb       |        |       | Unknown   |            |
| 2    | 17.116         | 15734127 | 49.95  | 598875 | bb       |        |       | Unknown   |            |

**2-(*tert*-butylamino)-2-oxo-1-phenylethyl phenylacetate (15l): racemate**

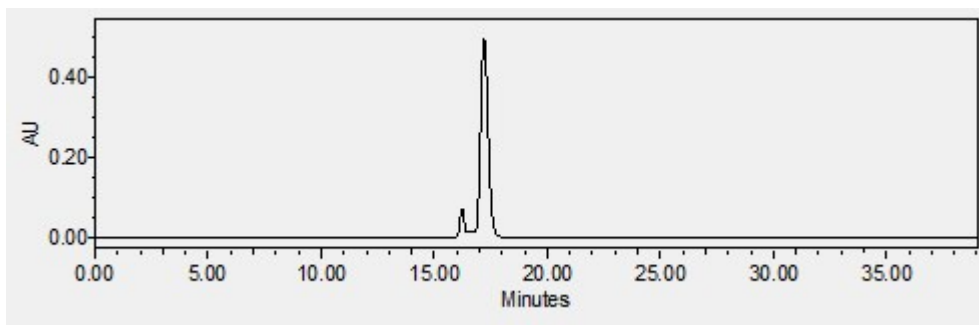

|   | Name | Retention Time | Area     | % Area | Height | Int Type | Amount | Units | Peak Type | Peak Codes |
|---|------|----------------|----------|--------|--------|----------|--------|-------|-----------|------------|
| 1 |      | 16.378         | 901121   | 3.47   | 775    | bb       |        |       | Unknown   |            |
| 2 |      | 17.556         | 25037695 | 96.53  | 589843 | bb       |        |       | Unknown   |            |

**2-(*tert*-butylamino)-2-oxo-1-phenylethyl phenylacetate (15l):** in the presence of chiral catalyst **11**.

**2-(*tert*-butylamino)-1-(4-chlorophenyl)-2-oxoethyl pyridin-3-carboxylate (15m):**

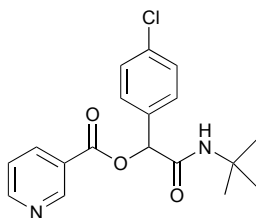

White solid (270 mg, 78% yield); mp 169–170°C (from EtOH). Found: C, 62.59; H, 5.48; N 8.15. Calc. for  $C_{18}H_{19}ClN_2O_3$ : C, 62.34; H, 5.52; N, 8.08. 96.5% ee, determined by chiral stationary phase HPLC analysis (Daicel Chiralpack IG-SFC) isopropanol/hexane = 10/90, 1.0 mL/min,  $\lambda$  = 230 nm,  $t_R$  (minor) = 17.9 min,  $t_R$  (major) = 19.1 min.  $\nu_{max}/cm^{-1}$  3278 (NH), 1719, 1650 (CO).  $\delta_H$  (600 MHz,  $CDCl_3$ ) 9.26 (s, 1H), 8.80 (d,  $J$  = 4.2 Hz, 1H), 8.32–8.30 (m, 1H), 7.44 (d,  $J$  = 8.4 Hz, 2H), 7.42–7.41 (m, 1H), 7.35 (d,  $J$  = 8.4 Hz, 2H), 6.14 (s, 1H), 5.92 (br s, 1H), 1.34 (s, 9H).  $\delta_C$  (150 MHz,  $CDCl_3$ ) 167.7, 165.1, 164.7,

160.1, 133.6, 132.1, 129.8, 129.1, 128.7, 128.2, 114.4, 75.8, 55.7, 28.7.  $m/z$ : 346 ( $M^+$ , 1%), 247 (50), 106 (100). HRMS (ESI,  $m/z$ ): 347.11 ( $M+H^+$ ).

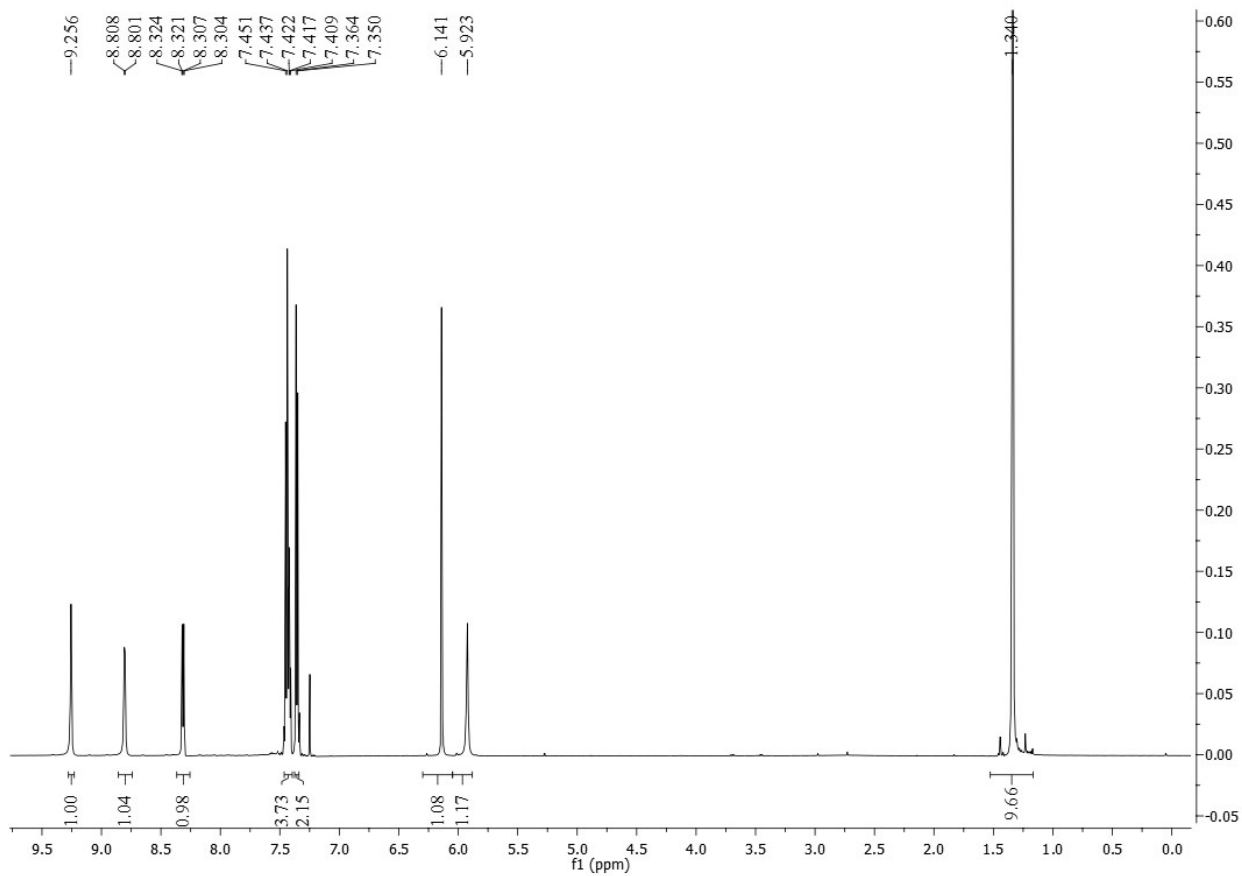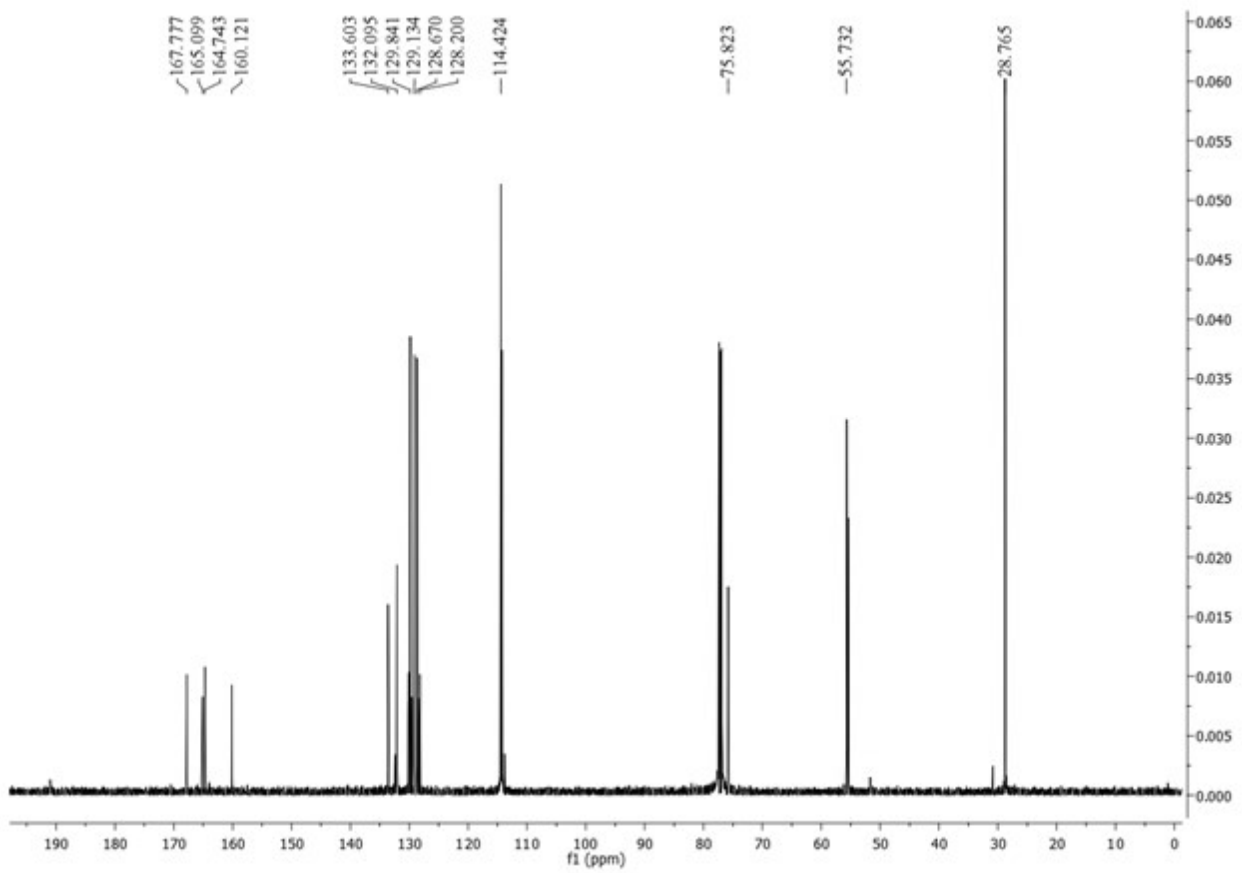

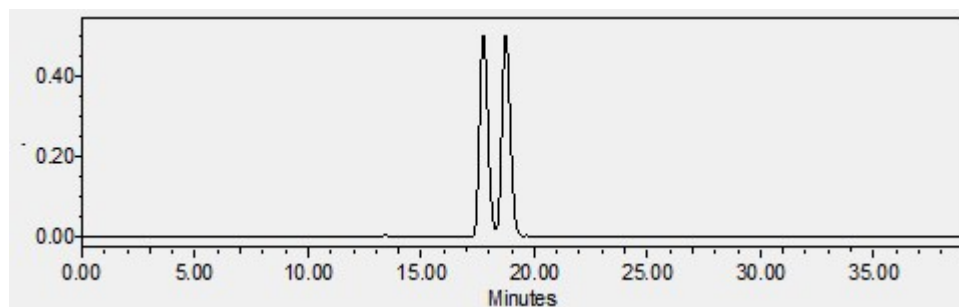

|   | Name | Retention Time | Area    | % Area | Height | Int Type | Amount | Units | Peak Type | Peak Codes |
|---|------|----------------|---------|--------|--------|----------|--------|-------|-----------|------------|
| 1 |      | 17.995         | 9328774 | 49.99  | 419451 | bb       |        |       | Unknown   |            |
| 2 |      | 19.003         | 9330125 | 50.01  | 419577 | bb       |        |       | Unknown   |            |

**2-(*tert*-butylamino)-1-(4-chlorophenyl)-2-oxoethyl pyridin-3-carboxylate (15m): racemate**

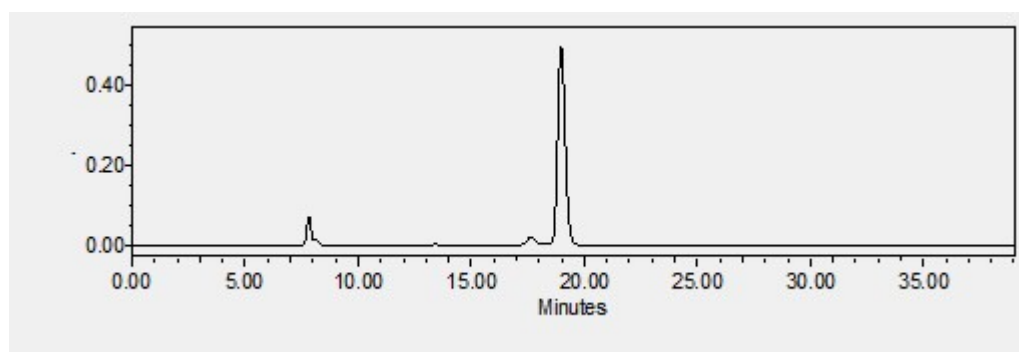

|   | Name | Retention Time | Area     | % Area | Height | Int Type | Amount | Units | Peak Type | Peak Codes |
|---|------|----------------|----------|--------|--------|----------|--------|-------|-----------|------------|
| 1 |      | 17.986         | 461121   | 1.74   | 305    | bb       |        |       | Unknown   |            |
| 2 |      | 19.118         | 26037695 | 98.26  | 423567 | bb       |        |       | Unknown   |            |

**2-(*tert*-butylamino)-1-(4-chlorophenyl)-2-oxoethyl pyridin-3-carboxylate (15m): in the presence of chiral catalyst 11.**



**2-(2-naphthylamino)-2-oxo-1-phenylethyl benzoate (15n):**

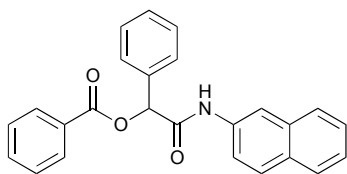

White waxy solid (330 mg, 87% yield). Found: C, 79.01; H, 4.38; N 3.49. Calc. for  $C_{25}H_{19}NO_3$ : C, 78.72; H, 5.02; N, 3.67. 98.4% ee, determined by chiral stationary phase HPLC analysis (Daicel Chiralpack IG-SFC) isopropanol/hexane = 20/80, 1.0 mL/min,  $\lambda = 230$  nm,  $t_R$  (minor) = 30.6 min,  $t_R$  (major) = 32.3 min.  $\nu_{max}/cm^{-1}$  3274 (NH), 1739, 1651 (CO).  $\delta H$  (600 MHz,  $CDCl_3$ ) 8.193–8.191 (m, 2H), 7.84–7.83 (m, 3H), 7.75–7.74 (m, 2H), 7.67–7.55 (m, 4H), 7.48–7.32 (m, 6H), 6.58 (s, 1H).  $\delta C$  (150 MHz,  $CDCl_3$ ) 167.3, 165.8, 136.4, 135.3, 134.6, 133.8, 130.1, 129.8, 129.4, 129.3, 129.1, 129.0, 128.7, 127.8, 127.7, 127.6, 126.5, 125.4, 120.2, 117.8, 76.6.  $m/z$ : 381 ( $M^+$ , 1%), 142 (60), 105 (100). HRMS (ESI,  $m/z$ ): 382.14 ( $M+H^+$ ).

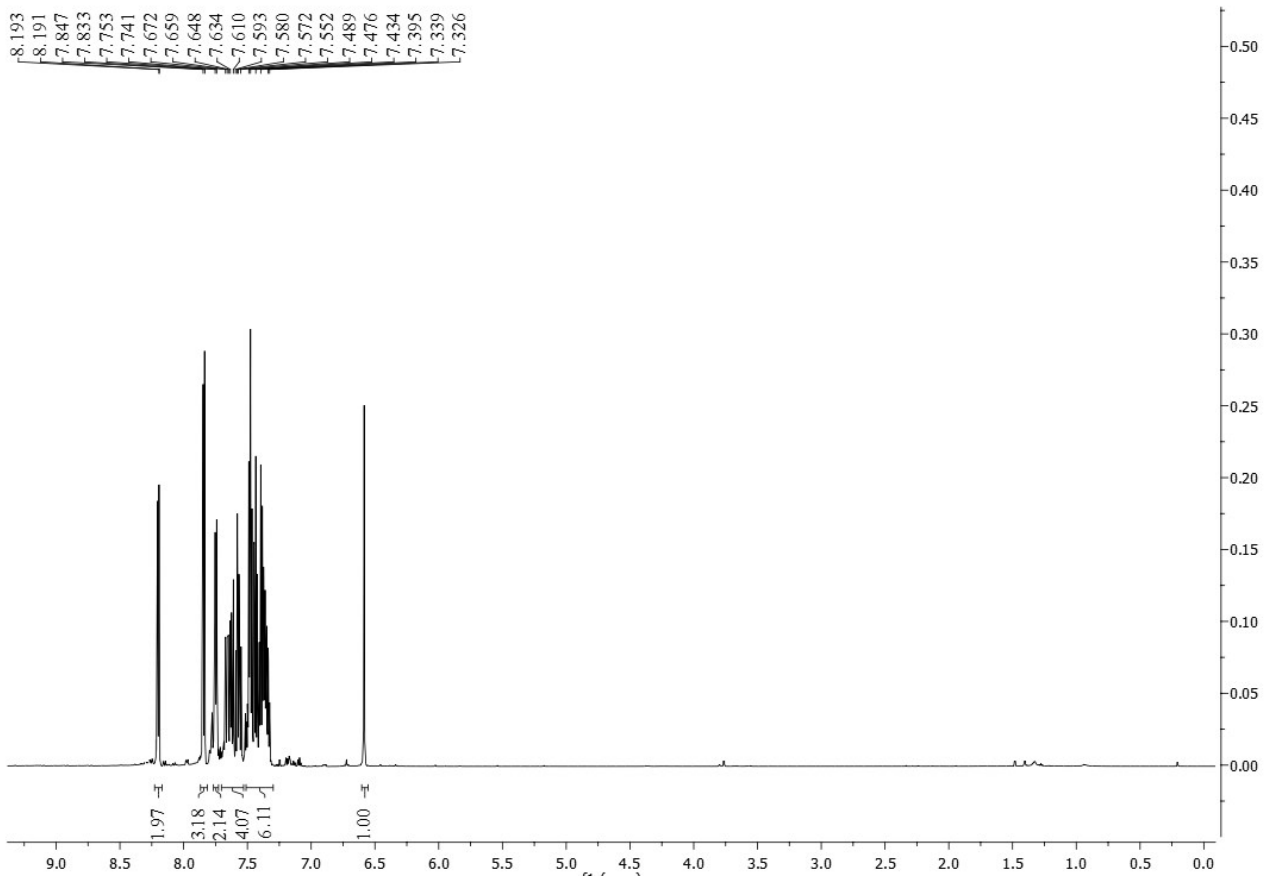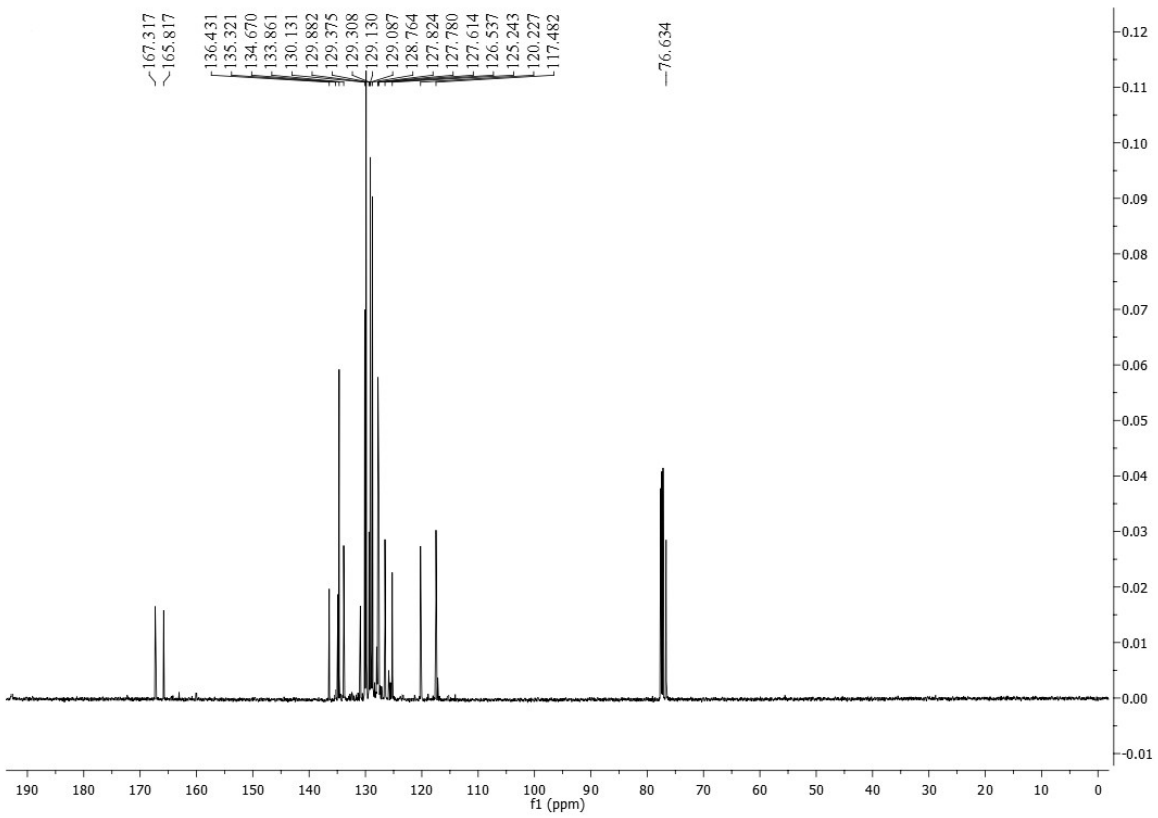

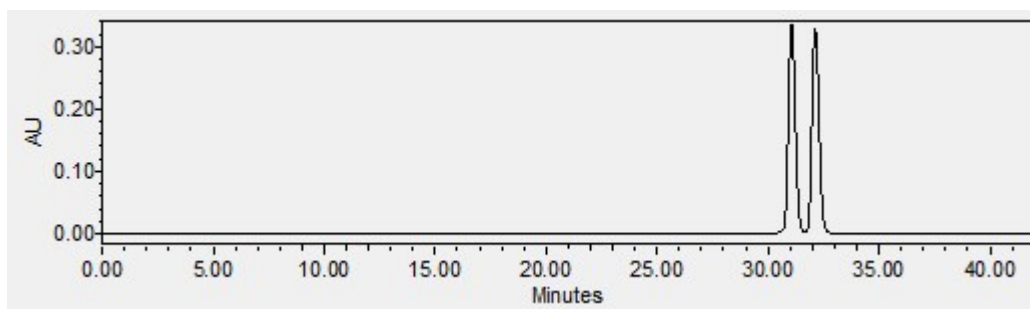

|   | Name | Retention Time | Area    | % Area | Height | Int Type | Amount | Units | Peak Type | Peak Codes |
|---|------|----------------|---------|--------|--------|----------|--------|-------|-----------|------------|
| 1 |      | 31.056         | 9293946 | 51.97  | 276287 | bb       |        |       | Unknown   |            |
| 2 |      | 32.688         | 8587991 | 48.03  | 260279 | bb       |        |       | Unknown   |            |

**2-(2-naphthylamino)-2-oxo-1-phenylethyl benzoate (15n): racemate**

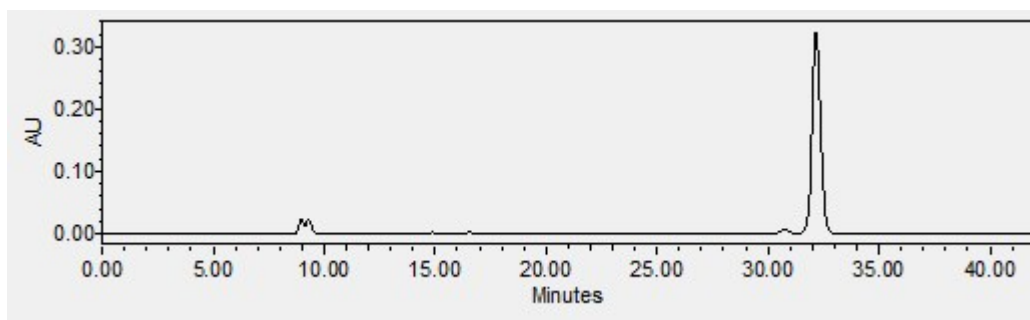

|   | Name | Retention Time | Area    | % Area | Height | Int Type | Amount | Units | Peak Type | Peak Codes |
|---|------|----------------|---------|--------|--------|----------|--------|-------|-----------|------------|
| 1 |      | 30.665         | 67775   | 0.82   | 251    | bb       |        |       | Unknown   |            |
| 2 |      | 32.375         | 8238128 | 99.18  | 264334 | bb       |        |       | Unknown   |            |

**2-(2-naphthylamino)-2-oxo-1-phenylethyl benzoate (15n): in the presence of chiral catalyst 11.**

**1-(4-chlorophenyl)-2-(2-naphthylamino)-2-oxoethyl benzoate (15o):**

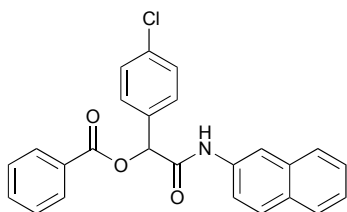

White waxy solid (345 mg, 83% yield). Found: C, 72.34; H, 4.27; N 3.31. Calc. for  $C_{25}H_{18}ClNO_3$ : C, 72.20; H, 4.36; N, 3.37. 95.3% ee, determined by chiral stationary phase HPLC analysis (Daicel Chiralpack IG-SFC) isopropanol/hexane = 20/80, 1.0 mL/min,  $\lambda$  = 254 nm,  $t_R$  (minor) = 35.6 min,  $t_R$  (major) = 37.3 min.  $\nu_{max}/cm^{-1}$  3268 (NH), 1719, 1654 (CO).  $\delta_H$  (600 MHz,  $CDCl_3$ ) 8.15–8.13 (m, 2H), 7.77 (d,  $J$  = 8.4 Hz, 2H), 7.73–7.71 (m, 2H), 7.60–7.57 (m, 2H), 7.48–7.44 (m, 6H), 7.34 (d,  $J$  = 8.4 Hz, 2H), 6.49 (s, 1H).  $\delta_C$  (150 MHz,  $CDCl_3$ ) 166.9, 165.5, 135.3, 134.7, 134.0, 133.5, 131.0, 130.2, 130.0, 129.5, 129.2, 129.0, 128.8, 128.5, 127.7, 127.6, 126.6, 125.4, 119.9, 117.4, 74.7.  $m/z$ : 415 ( $M^+$ , 1%), 142 (32), 105 (100). HRMS (ESI,  $m/z$ ): 416.11( $M+H^+$ ).

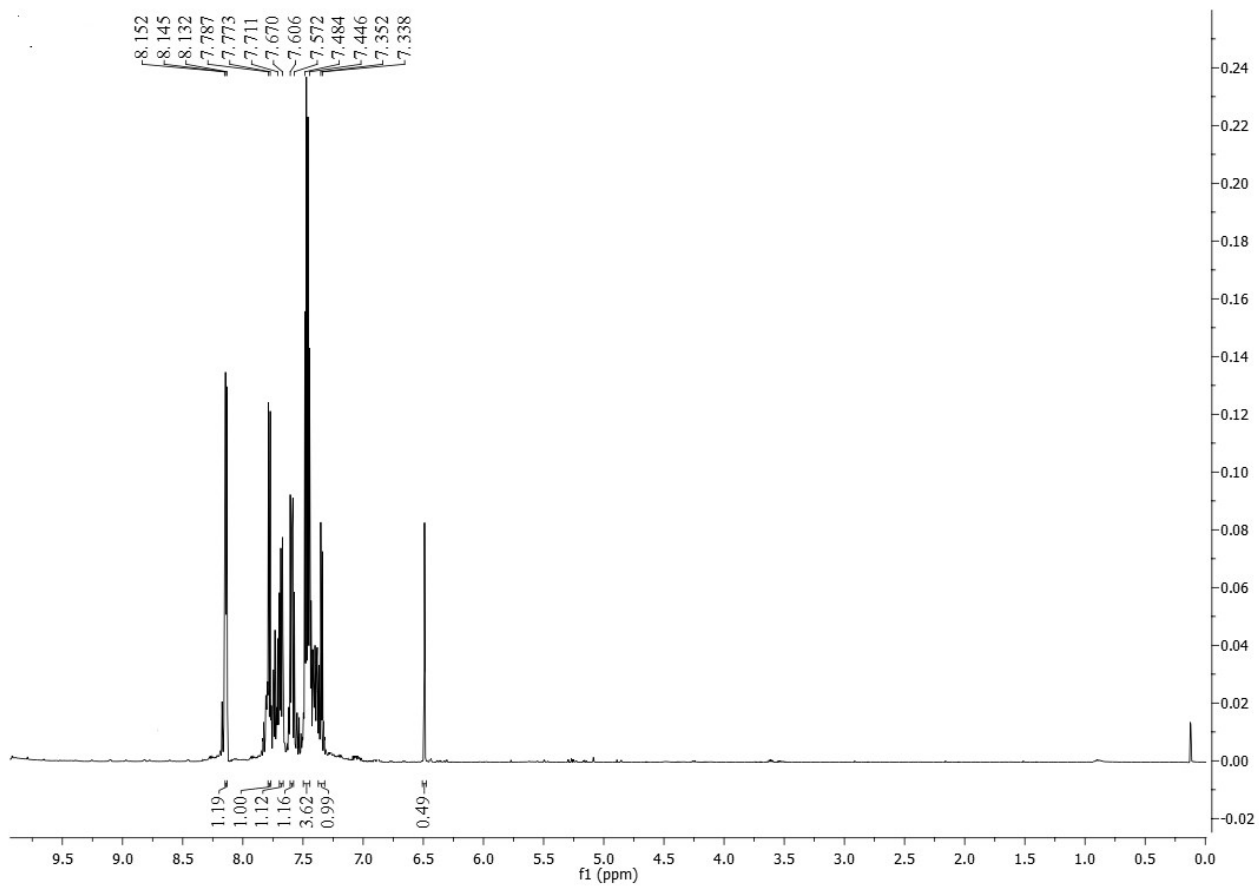

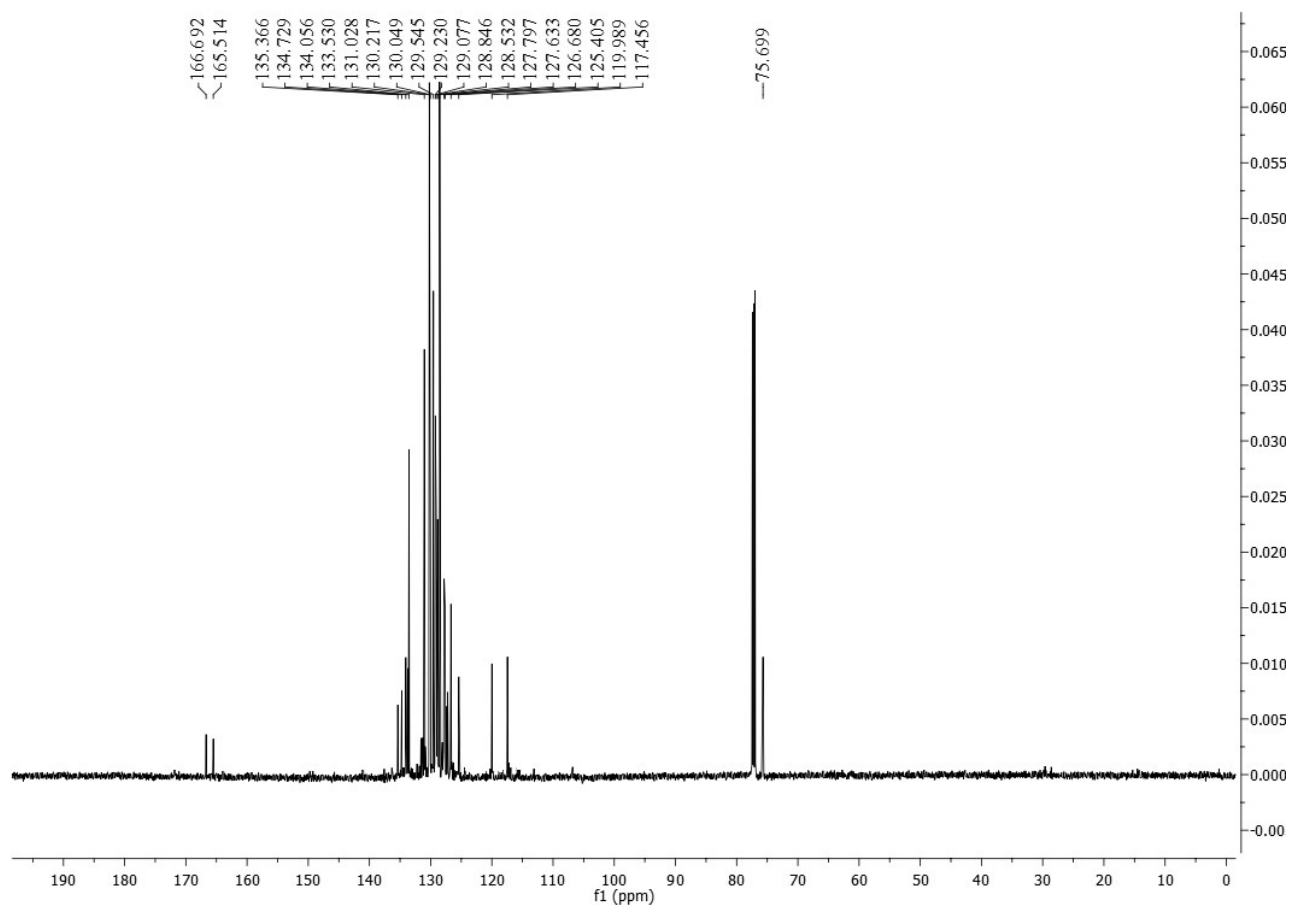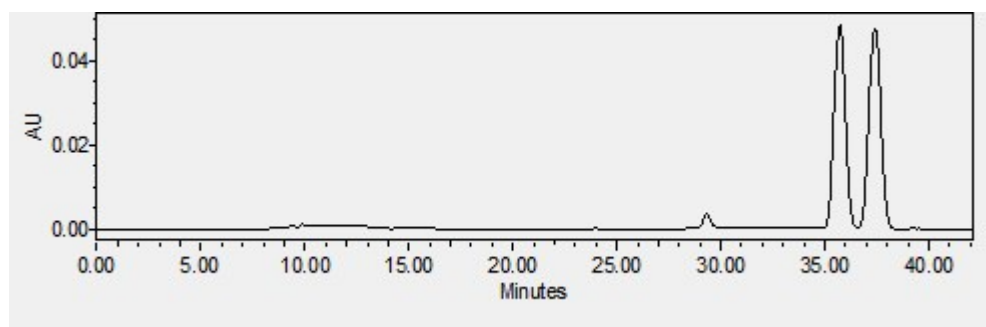

| Name | Retention Time | Area    | % Area | Height | Int Type | Amount | Units | Peak Type | Peak Codes |
|------|----------------|---------|--------|--------|----------|--------|-------|-----------|------------|
| 1    | 35.996         | 4045807 | 48.96  | 218871 | bb       |        |       | Unknown   |            |
| 2    | 37.992         | 4217634 | 51.04  | 216640 | bb       |        |       | Unknown   |            |

**1-(4-chlorophenyl)-2-(2-naphthylamino)-2-oxoethyl benzoate (15o): racemate**

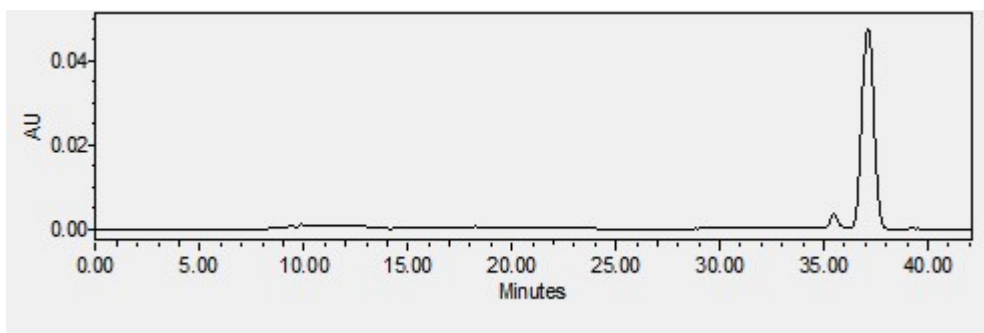

| Name | Retention Time | Area    | % Area | Height | Int Type | Amount | Units | Peak Type | Peak Codes |
|------|----------------|---------|--------|--------|----------|--------|-------|-----------|------------|
| 1    | 35.627         | 199775  | 2.36   | 388    | bb       |        |       | Unknown   |            |
| 2    | 37.273         | 8263441 | 97.64  | 234638 | bb       |        |       | Unknown   |            |

**1-(4-chlorophenyl)-2-(2-naphthylamino)-2-oxoethyl benzoate (15o): in the presence of chiral catalyst 11.**

**2-(2-naphthylamino)-1-(3-nitrophenyl)-2-oxoethyl acetate (15p):**

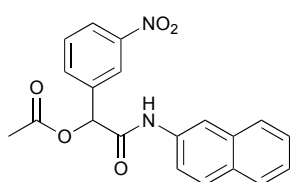

White waxy solid (305 mg, 84% yield). Found: C, 66.12; H, 4.28; N 8.00. Calc. for  $C_{20}H_{16}N_2O_5$ : C, 65.93; H, 4.43; N, 7.69. 97.6% ee, determined by chiral stationary phase HPLC analysis (Daicel Chiralpack IG-SFC) isopropanol/hexane = 20/80, 1.0 mL/min,  $\lambda = 230$  nm,  $t_R$  (minor) = 37.1 min,  $t_R$  (major) = 39.1 min.  $\nu_{max}/cm^{-1}$  3274 (NH), 1739, 1651 (CO).  $\delta H$  (600 MHz,  $CDCl_3$ ) 8.58–8.56 (m, 1H), 8.40–8.37 (m, 1H), 8.36–8.35 (m, 2H), 7.66–7.63 (m, 4H), 7.35–7.345 (m, 1H), 7.342–7.340 (m, 2H), 6.31 (s, 1H) 5.31 (br s, 1H), 2.28 (s, 3H).  $\delta C$  (150 MHz,  $CDCl_3$ ) 169.5, 166.1, 148.3, 141.5, 137.3, 134.8, 130.5, 129.9, 128.9, 128.6, 127.7, 127.6, 126.7, 125.5, 124.3, 124.0, 122.2, 117.6, 74.7, 21.5.  $m/z$ : 364 ( $M^+$ , 10%), 142 (100), 43 (80). HRMS (ESI,  $m/z$ ): 365.10 ( $M+H^+$ ).





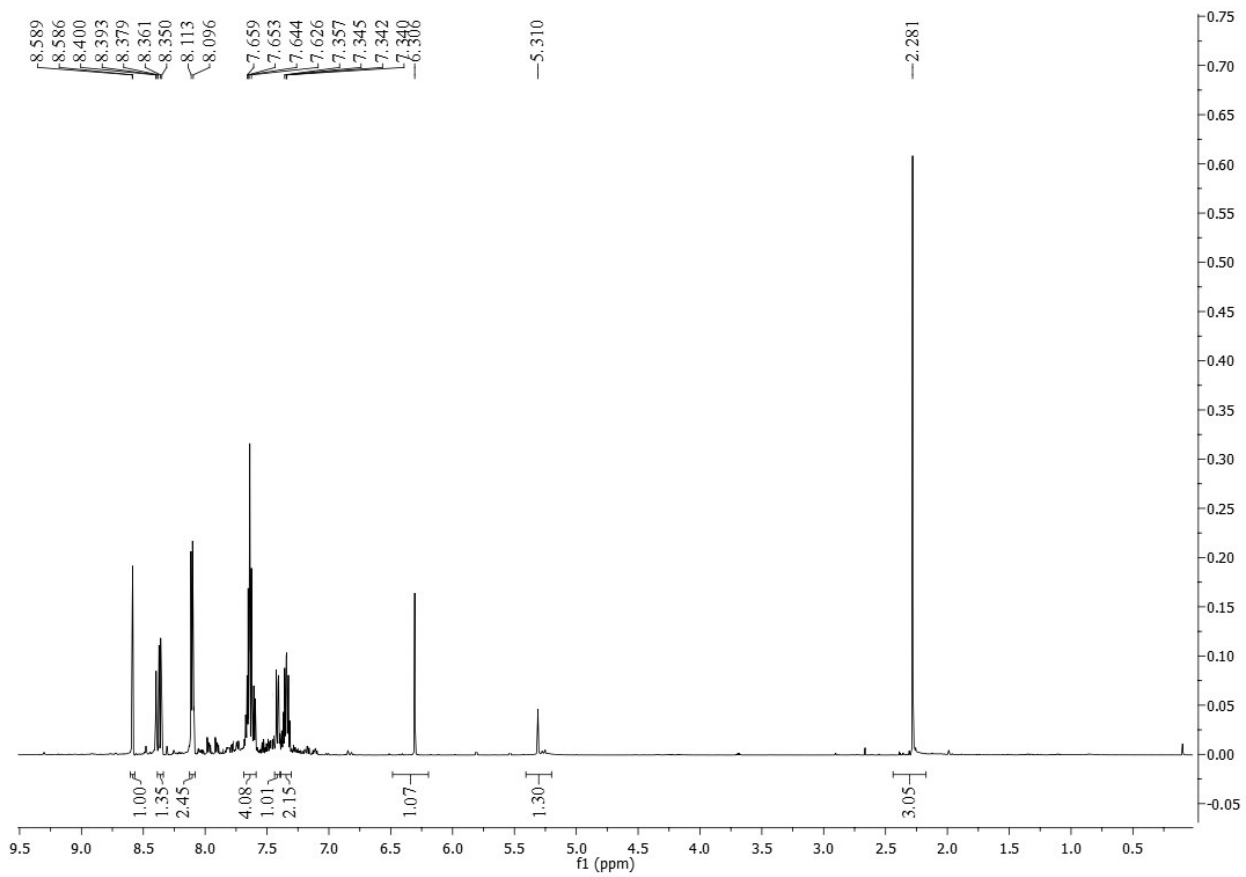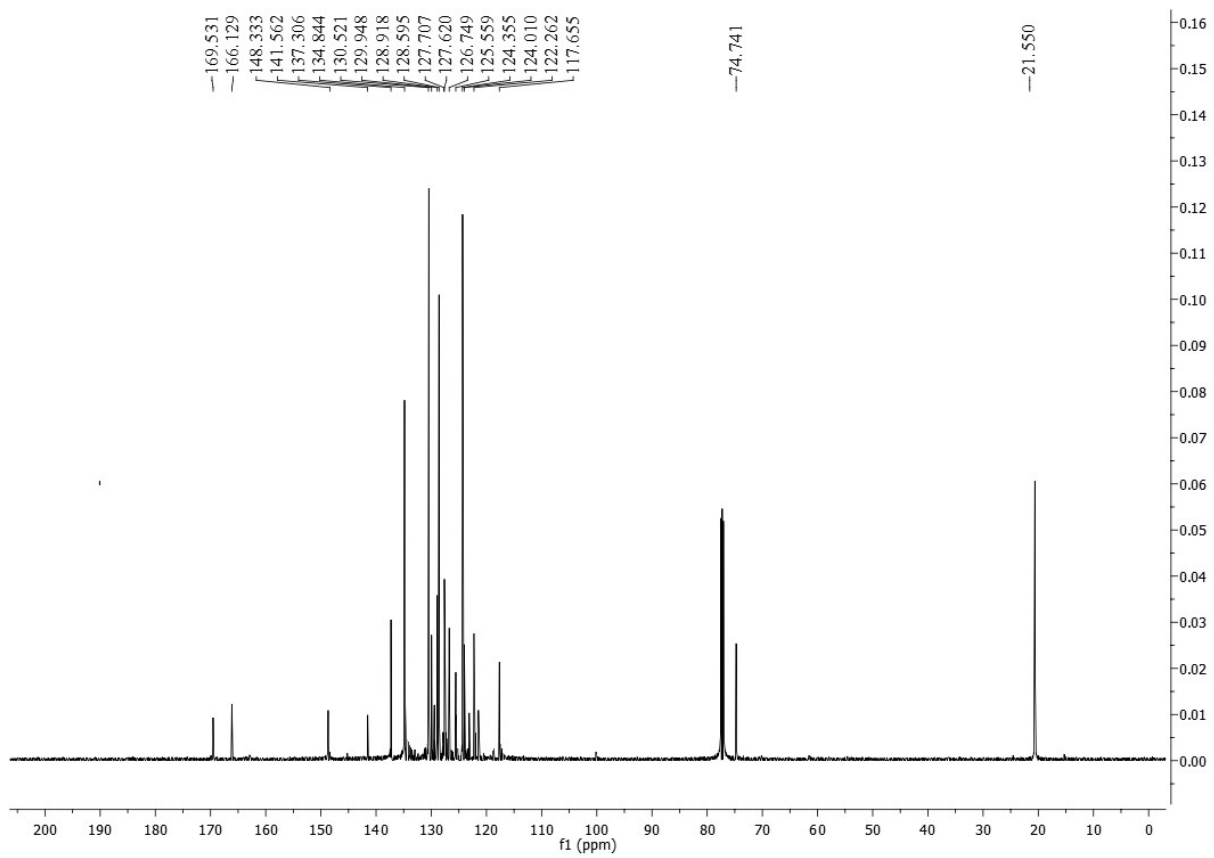

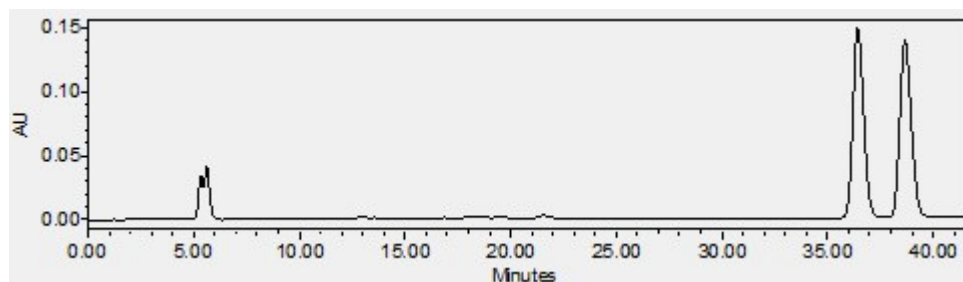

| Name | Retention Time | Area     | % Area | Height | Int Type | Amount | Units | Peak Type | Peak Codes |
|------|----------------|----------|--------|--------|----------|--------|-------|-----------|------------|
| 1    | 36.525         | 22287677 | 49.67  | 785949 | bb       |        |       | Unknown   |            |
| 2    | 39.010         | 22579835 | 50.33  | 727913 | bb       |        |       | Unknown   |            |

**2-(2-naphthylamino)-1-(3-nitrophenyl)-2-oxoethyl acetate (15p): racemate**

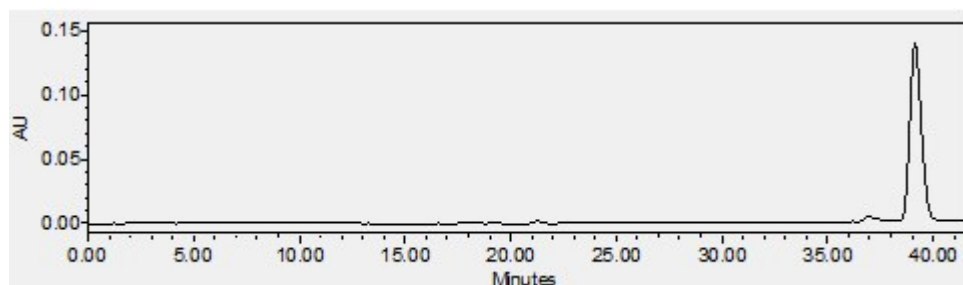

| Name | Retention Time | Area     | % Area | Height | Int Type | Amount | Units | Peak Type | Peak Codes |
|------|----------------|----------|--------|--------|----------|--------|-------|-----------|------------|
| 1    | 37.125         | 176566   | 1.21   | 250    | bb       |        |       | Unknown   |            |
| 2    | 39.018         | 14466813 | 98.79  | 716952 | bb       |        |       | Unknown   |            |

**2-(2-naphthylamino)-1-(3-nitrophenyl)-2-oxoethyl acetate (15p): in the presence of chiral catalyst 11.**

**3-methyl-1-(2-naphthylamino)-1-oxobut-2-yl acetate (15q):**

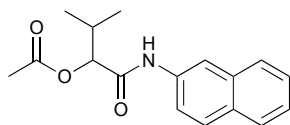

White waxy solid (245 mg, 86% yield). Found: C, 72.00; H, 6.62; N 4.97. Calc. for  $C_{17}H_{19}NO_3$ : C, 71.56; H, 6.71; N, 4.91. 96.1% ee, determined by chiral stationary phase HPLC analysis (Daicel Chiralpack IG-SFC) isopropanol/hexane = 20/80, 1.0 mL/min,  $\lambda = 214$  nm,  $t_R$  (minor) = 24.8 min,  $t_R$  (major) = 25.1 min.  $\nu_{max}/cm^{-1}$  3281 (NH), 1716, 1655 (CO).  $\delta_H$  (600 MHz,  $CDCl_3$ ) 7.90–7.88 (m, 2H), 7.37–7.36 (m, 1H), 7.26–7.23 (m, 2H), 7.01–7.00 (m, 2H), 6.054 (d,  $J = 3.6$ , 1H), 6.050 (br s, 1H), 2.19 (s, 4H), 1.22–1.17 (m, 6H).  $\delta_C$  (150 MHz,  $CDCl_3$ ) 170.2, 160.0, 134.6, 133.4, 133.1, 130.4, 130.1, 129.8, 129.7, 128.9, 128.4, 128.2, 69.8, 51.7, 30.4, 28.4, 13.8.  $m/z$ : 285 ( $M^+$ , 30%), 142 (100), 43 (20). HRMS (ESI,  $m/z$ ): 286.14 ( $M+H^+$ ).

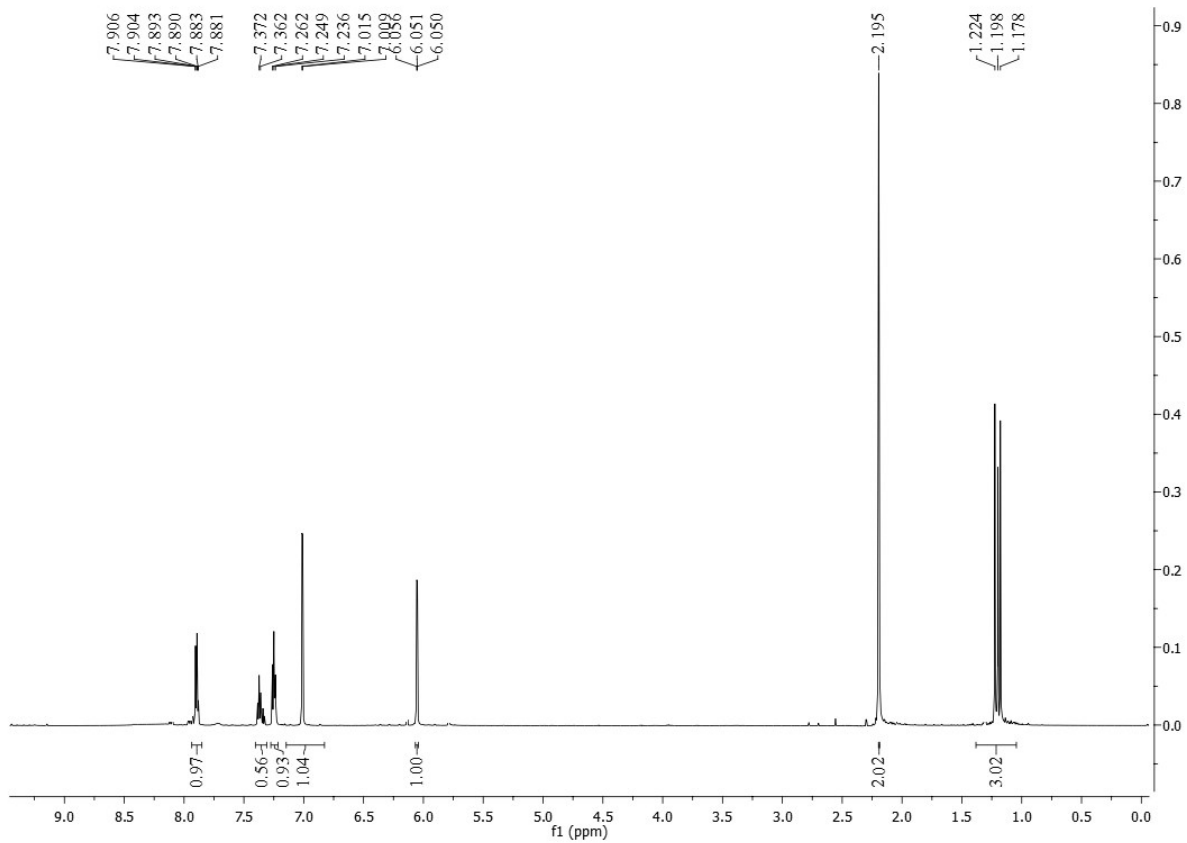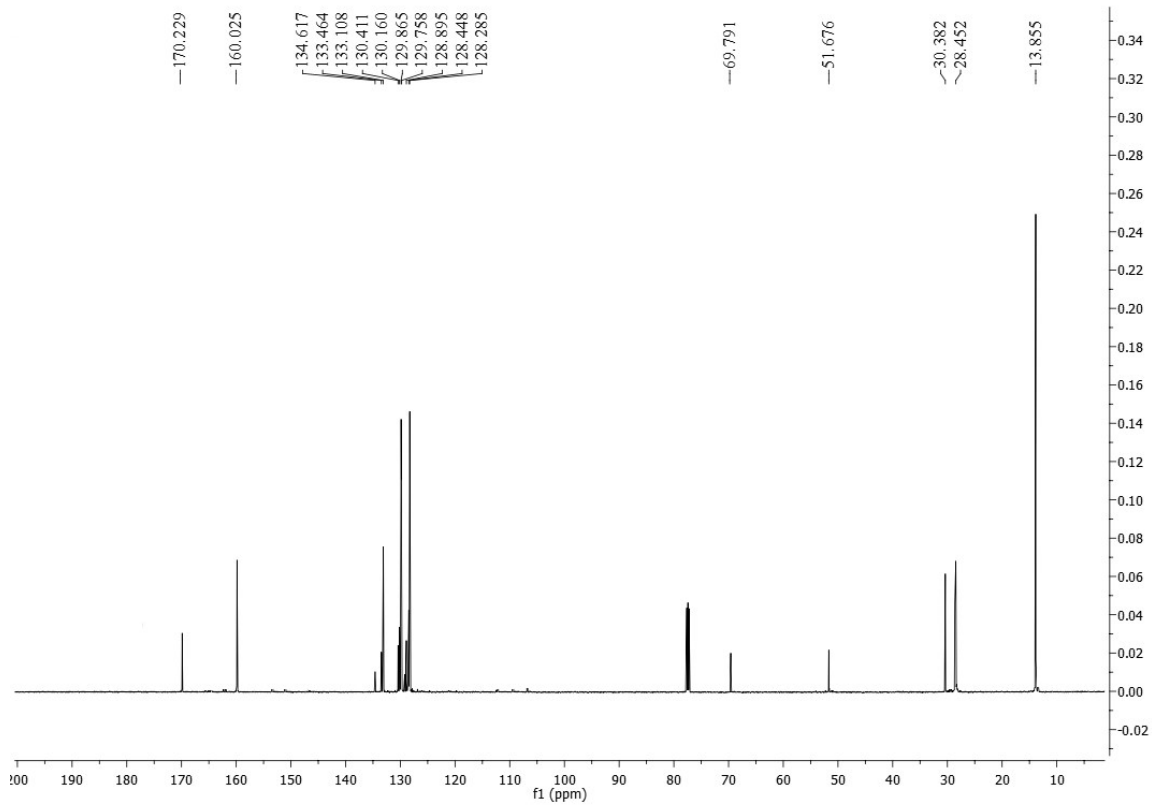

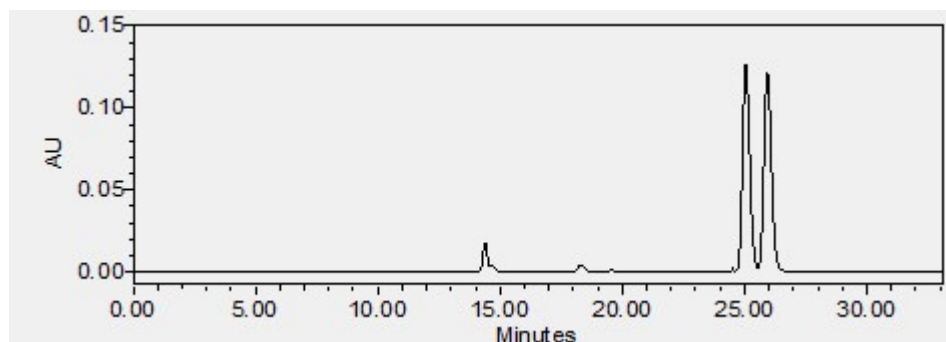

|   | Name | Retention Time | Area    | % Area | Height | Int Type | Amount | Units | Peak Type | Peak Codes |
|---|------|----------------|---------|--------|--------|----------|--------|-------|-----------|------------|
| 1 |      | 25.008         | 6080262 | 50.14  | 288825 | bb       |        |       | Unknown   |            |
| 2 |      | 26.121         | 6045805 | 49.86  | 279754 | bb       |        |       | Unknown   |            |

**3-methyl-1-(2-naphthylamino)-1-oxobut-2-yl acetate (15q): racemate**

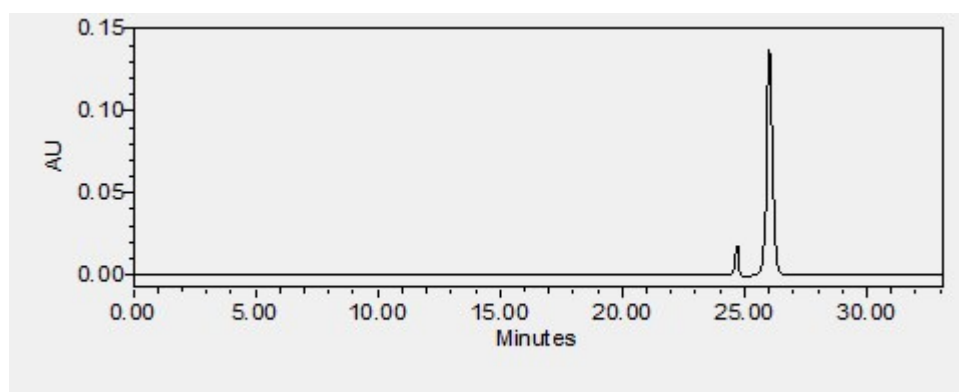

|   | Name | Retention Time | Area    | % Area | Height | Int Type | Amount | Units | Peak Type | Peak Codes |
|---|------|----------------|---------|--------|--------|----------|--------|-------|-----------|------------|
| 1 |      | 24.475         | 185555  | 1.97   | 951    | bb       |        |       | Unknown   |            |
| 2 |      | 25.107         | 9237137 | 98.03  | 290582 | bb       |        |       | Unknown   |            |

**3-methyl-1-(2-naphthylamino)-1-oxobut-2-yl acetate (15q): in the presence of chiral catalyst 11.**

# Starting urea/choline chloride DES

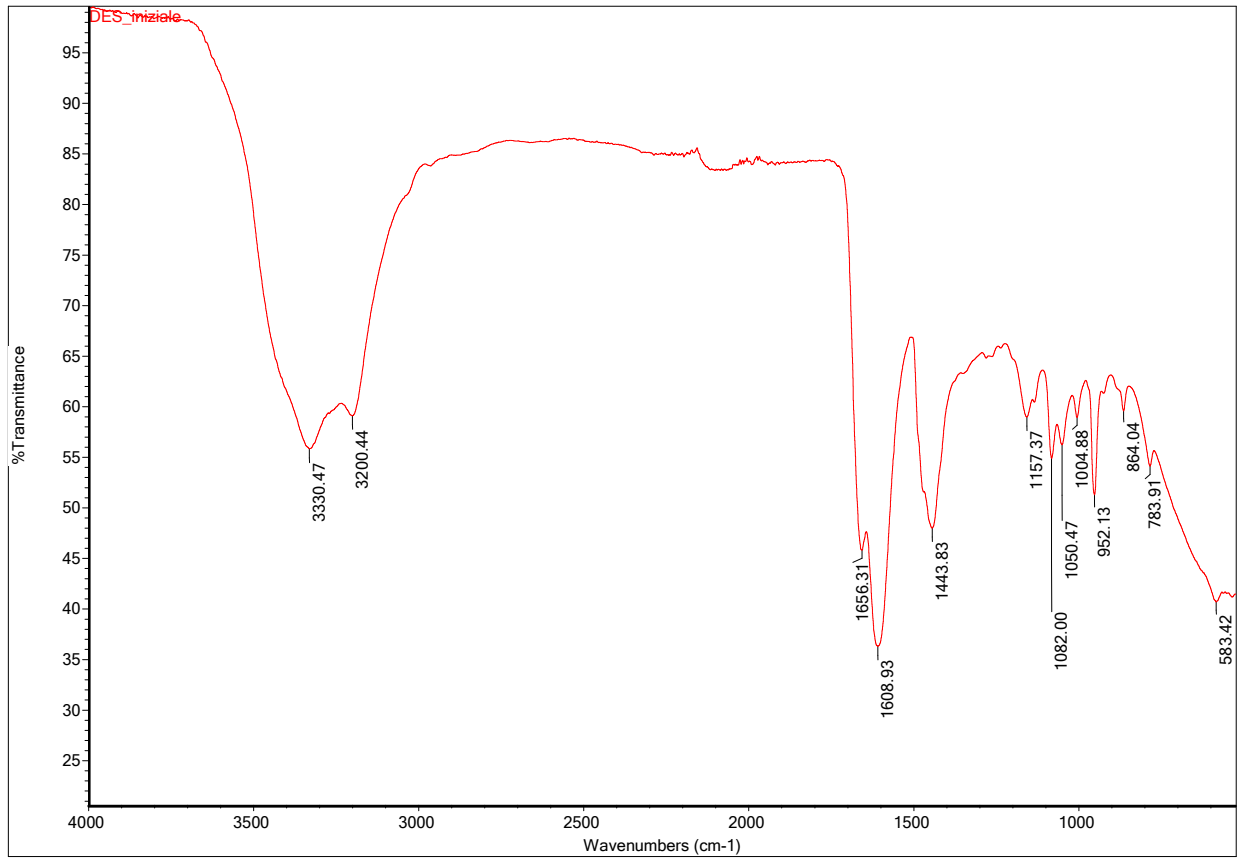

# Recovered urea/choline chloride DES

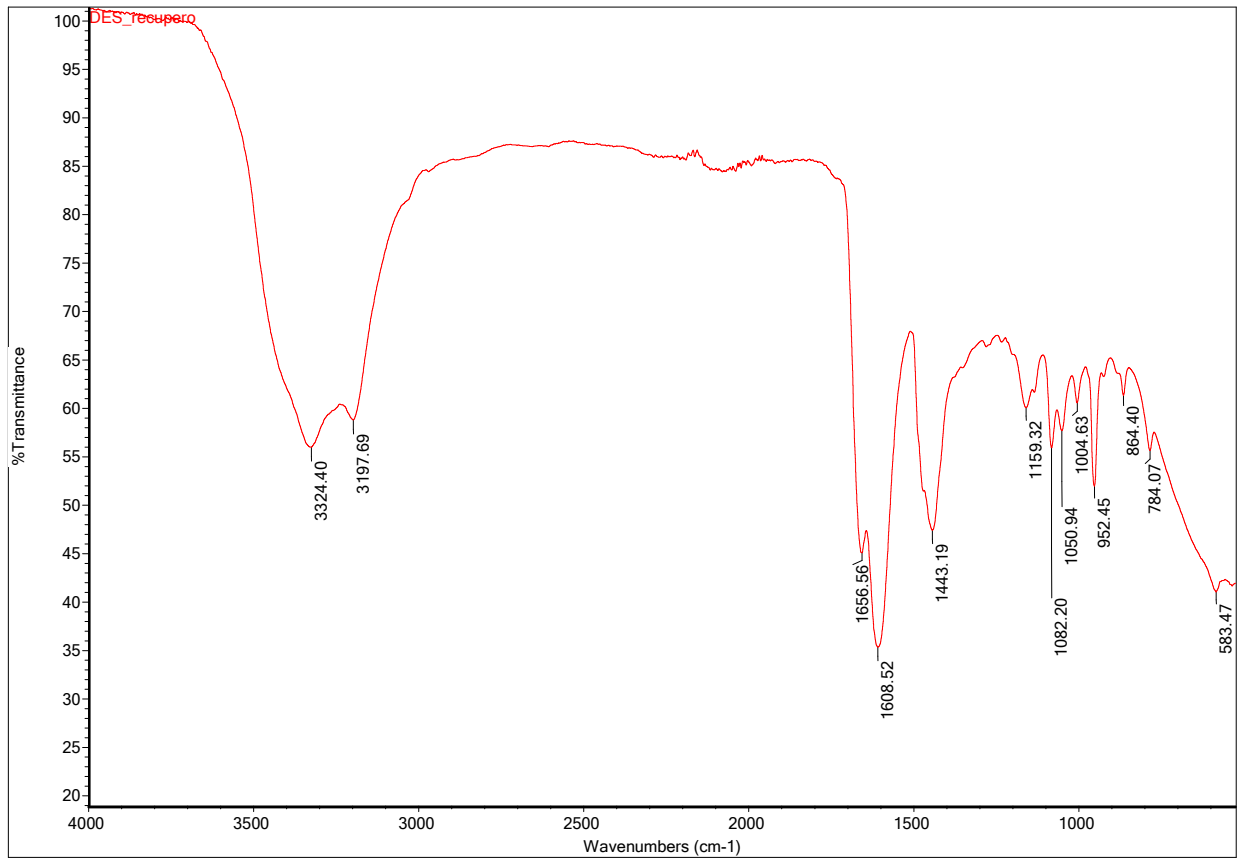

Starting urea/choline Chloride DES; spectra recorded in D<sub>2</sub>O

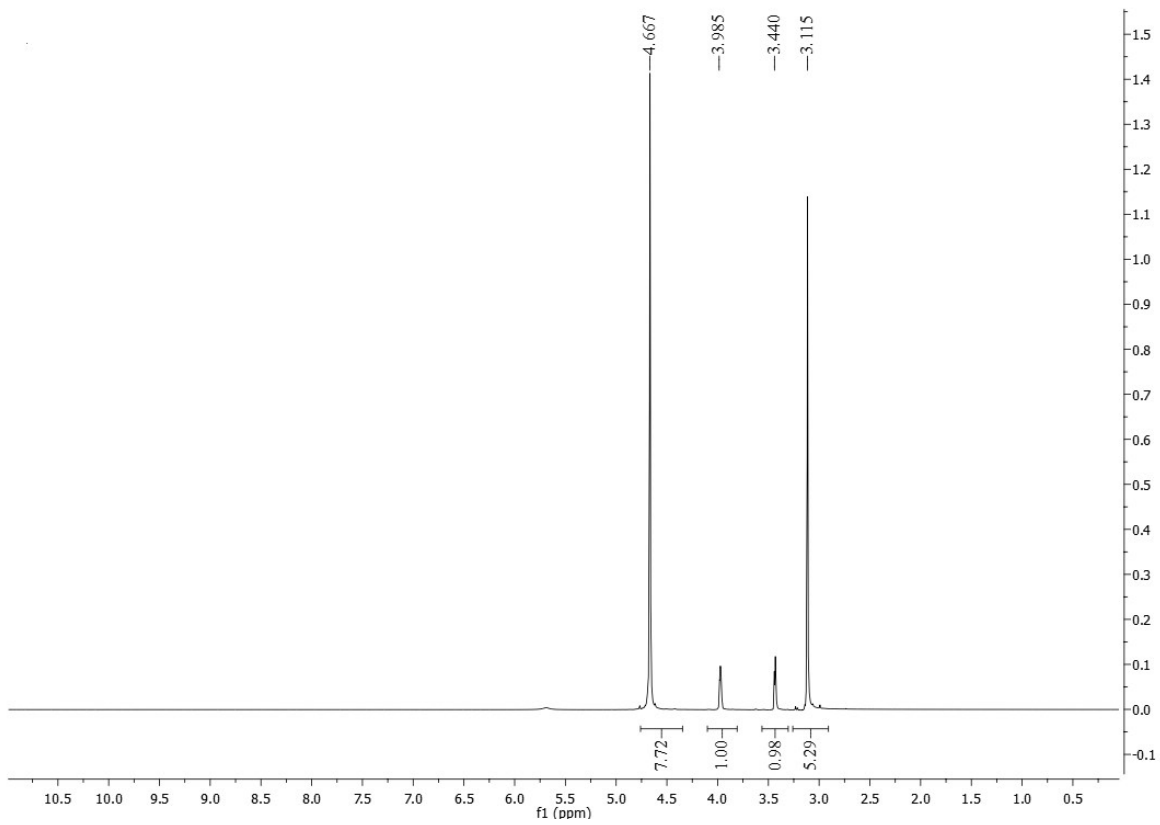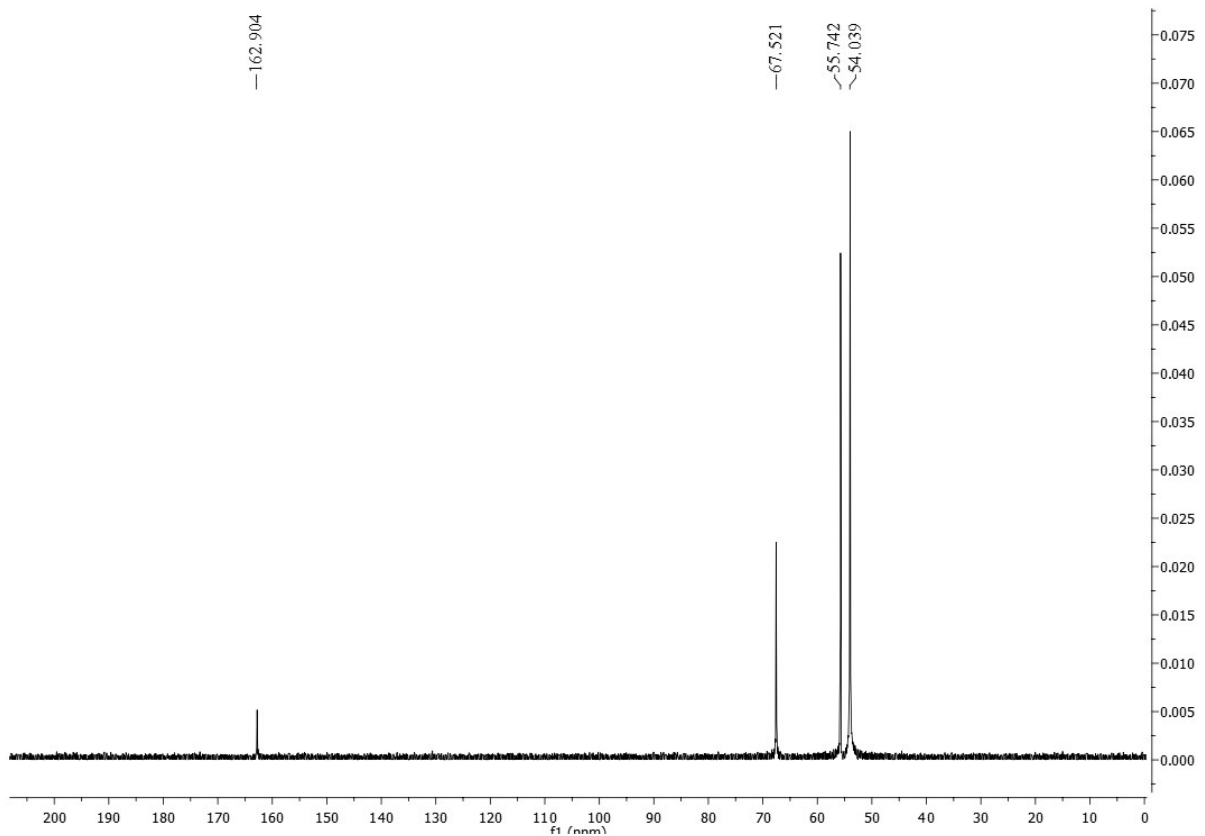



Recovered urea/choline chloride DES. Spectra recorded in D<sub>2</sub>O

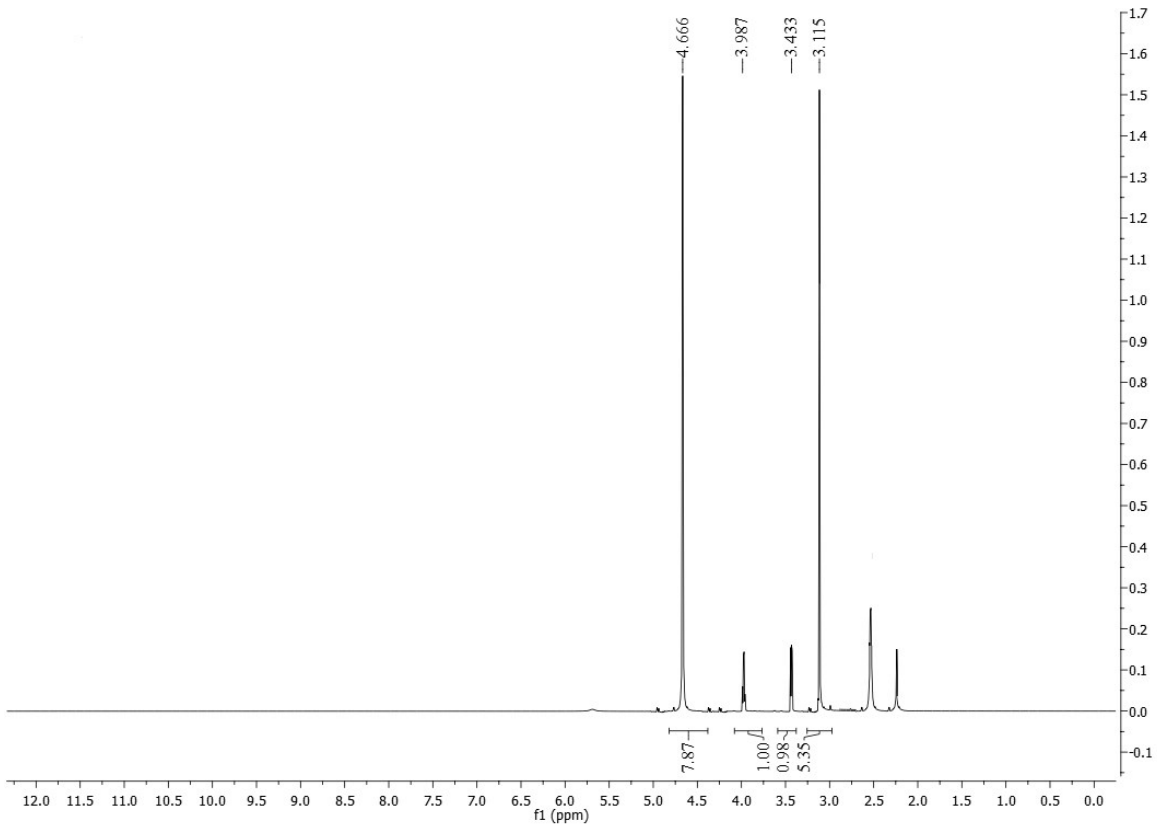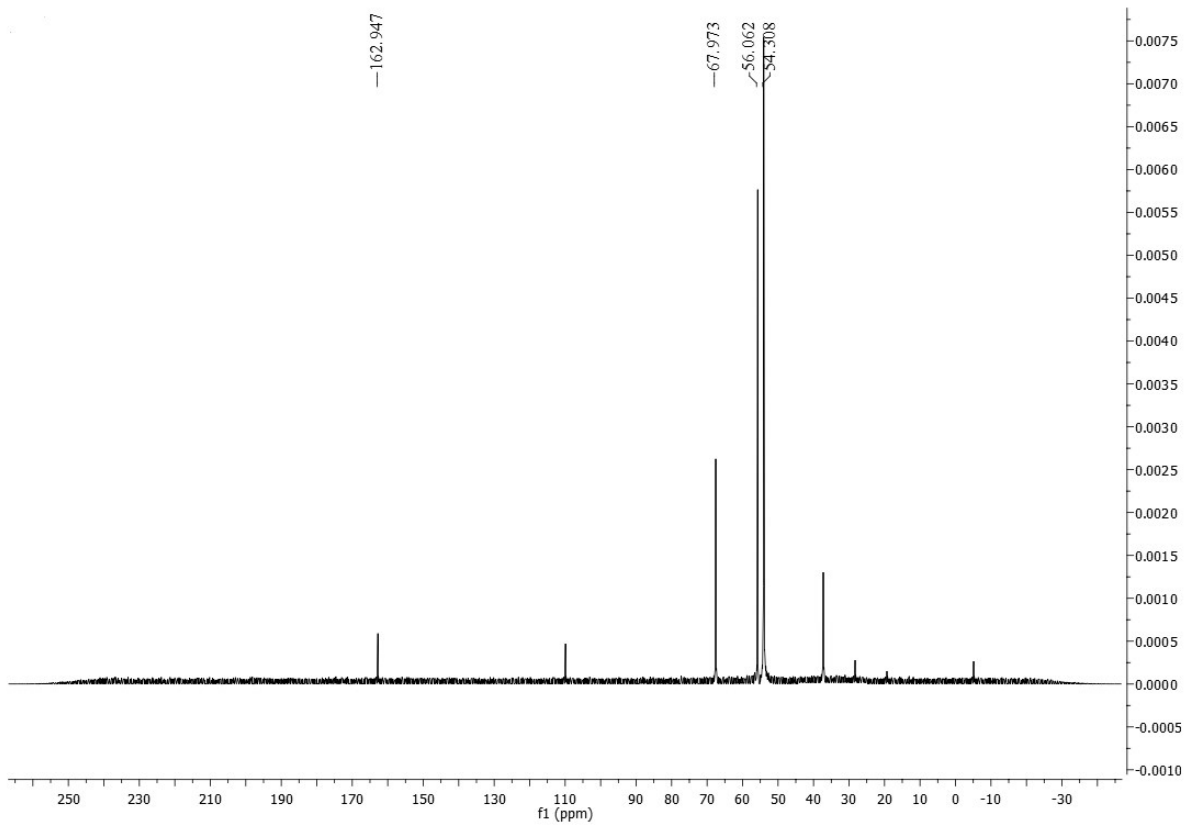

Supplement: d1ra05297g1.pdf [file d1ra05297g1.pdf]
